Rainer Waadt et al. – Coordination of signaling compound fluxes in roots

1 **AUTHOR NAMES AND AFFILIATIONS**

2 **Rainer Waadt,<sup>a,1</sup> Philipp Köster,<sup>b,d</sup> Zaida Andrés,<sup>a</sup> Christian Waadt,<sup>c</sup> Gabriele**  
3 **Bradamante,<sup>a,e</sup> Konstantinos Lampou,<sup>a,f</sup> Jörg Kudla,<sup>b</sup> and Karin Schumacher<sup>a</sup>**

4 <sup>a</sup> Entwicklungsbiologie der Pflanzen, Centre for Organismal Studies, Ruprecht-Karls-  
5 Universität Heidelberg, Heidelberg, Germany.

6 <sup>b</sup> Molekulare Genetik und Zellbiologie der Pflanzen, Institut für Biologie und  
7 Biotechnologie der Pflanzen, Westfälische Wilhelms-Universität Münster, Münster  
8 Germany.

9 <sup>c</sup> Not affiliated to a Research Institution.

10 <sup>d</sup> Present address: Molecular and Cellular Plant Physiology, Department of Plant and  
11 Microbial Biology, University of Zurich, Zurich, Switzerland.

12 <sup>e</sup> Present address: Epigenetic Changes in Plants, Gregor Mendel Institute of Molecular  
13 Plant Biology, Vienna, Austria.

14 <sup>f</sup> Present address: Entwicklungsbiologie, Institut für Pflanzenwissenschaften und  
15 Mikrobiologie, Universität Hamburg, Germany.

16 <sup>1</sup> Address correspondence to [rainer.waadt@gmail.com](mailto:rainer.waadt@gmail.com).

17 The authors responsible for distribution of materials integral to the findings presented in  
18 this article in accordance with policy described in the Instructions for Authors  
19 ([www.plantcell.org](http://www.plantcell.org)) are: Rainer Waadt ([rainer.waadt@gmail.com](mailto:rainer.waadt@gmail.com)) and Karin  
20 Schumacher ([karin.schumacher@cos.uni-heidelberg.de](mailto:karin.schumacher@cos.uni-heidelberg.de)).

21 **TITLE**

22 **Dual-sensing genetically encoded fluorescent indicators resolve the**  
23 **spatiotemporal coordination of cytosolic abscisic acid and second messenger**  
24 **dynamics in Arabidopsis**

25 **SHORT TITLE**

26 **Coordination of signaling compound fluxes in roots**

27

## 28 **ABSTRACT**

29 **Deciphering signal transduction processes is crucial for understanding**  
30 **how plants sense and respond to environmental changes. Various chemical**  
31 **compounds function as central messengers within deeply intertwined signaling**  
32 **networks. How such compounds act in concert remains to be elucidated. We**  
33 **have developed dual-sensing genetically encoded fluorescent indicators (2-In-1-**  
34 **GEFIs) for multiparametric in vivo analyses of the phytohormone abscisic acid**  
35 **(ABA), Ca<sup>2+</sup>, protons (H<sup>+</sup>), chloride (anions), the glutathione redox potential ( $E_{\text{GSH}}$ )**  
36 **and hydrogen peroxide (H<sub>2</sub>O<sub>2</sub>). Simultaneous analyses of two signaling**  
37 **compounds in *Arabidopsis* (*Arabidopsis thaliana*) roots revealed that ABA**  
38 **treatment and uptake did not trigger rapid cytosolic Ca<sup>2+</sup> or H<sup>+</sup> fluxes. Glutamate,**  
39 **ATP, Arabidopsis PLANT ELICITOR PEPTIDE (AtPEP1) and glutathione disulfide**  
40 **(GSSG) treatments induced rapid spatiotemporally overlapping cytosolic Ca<sup>2+</sup>, H<sup>+</sup>**  
41 **and anion fluxes, but except for GSSG only weakly affected the cytosolic redox**  
42 **state. Overall, 2-In-1-GEFIs enable complementary high-resolution in vivo**  
43 **analyses of signaling compound dynamics and facilitate an advanced**  
44 **understanding of the spatiotemporal coordination of signal transduction**  
45 **processes in Arabidopsis.**

46

## 47 **INTRODUCTION**

48 Understanding how plants sense and respond to environmental and extracellular  
49 fluctuations is key for our strategic progressions to limit the consequences of climate  
50 change on plant growth and crop productivity. Plants have evolved complex signal  
51 transduction networks that enable the sensing and integration of extracellular signals,  
52 and the processing and transduction of the underlying information into physiological-,  
53 growth- and developmental responses. Within such signaling networks, spatiotemporal  
54 concentration changes of hormones, the divalent cation Ca<sup>2+</sup> and reactive oxygen

55 species (ROS) mediate various downstream responses (Dodd et al., 2010; Kudla et al.,  
56 2010; Shan et al., 2012; Vanstraelen and Benková, 2012; Mittler et al., 2017; Waszczak  
57 et al., 2018; Smirnov and Arnaud, 2019). Among the plant hormones, abscisic acid  
58 (ABA) functions as a central regulator of the plant water status (Cutler et al., 2010;  
59 Finkelstein et al., 2013; Yoshida et al., 2019). Dynamic concentration changes of  
60 signaling compounds require inter- and intracellular transport, including long-distance  
61 transport and signaling, that often depend on proton ( $H^+$ ) and electrochemical gradients  
62 across membranes (Schumacher, 2014; Choi et al., 2016; Sze and Chanroj, 2018). In  
63 addition, environmental and cellular  $H^+$  concentration (pH) can affect plant growth,  
64 development and molecular properties (Shavrukov and Hirai, 2016). Therefore,  $H^+$  may  
65 also function in signaling (Sze and Chanroj, 2018).

66 In plants, hormonal,  $Ca^{2+}$ , ROS and pH signaling processes are intertwined on  
67 several levels (Hauser et al., 2011; Vanstraelen and Benková, 2012; Gilroy et al., 2014;  
68 Steinhorst and Kudla, 2014; Edel and Kudla, 2016), for example to regulate stomatal  
69 movements or root hair and pollen tube growth (Munemasa et al., 2015; Mangano et al.,  
70 2016; Hauser et al., 2017; Michard et al., 2017). In response to the growth hormone  
71 auxin, extracellular ATP, touch or wounding,  $Ca^{2+}$  signals are accompanied by an  
72 apoplastic alkalization and/or cytosolic acidification (Monshausen et al., 2009, 2011;  
73 Behera et al., 2018). However, except for the auxin response (Shih et al., 2015; Dindas  
74 et al., 2018), the underlying mechanisms are not well understood. Current models  
75 suggest that cytosolic  $Ca^{2+}$  and extracellular ROS signals are important for cell-to-cell  
76 communication and long-distance signaling (Gilroy et al., 2014; Steinhorst and Kudla,  
77 2014). Although some components, such as the ROS producing Arabidopsis  
78 (*Arabidopsis thaliana*) RESPIRATORY BURST OXIDASE HOMOLOG D (AtRBOHD),  
79 the ion channel TWO PORE CHANNEL1 (TPC1), GLUTAMATE RECEPTOR-LIKE  
80 CHANNELS (GLRs),  $Ca^{2+}$ -DEPENDENT PROTEIN KINASES (CDPKs/CPKs) and  
81 CALCINEURIN B-LIKE (CBL) proteins together with CBL-INTERACTING PROTEIN  
82 KINASES (CIPKs) have been linked to such processes (Choi et al., 2016; Waszczak et  
83 al., 2018), the underlying mechanisms remain unclear.

84 In order to decipher the coordination and interdependence of signaling  
85 processes, it is important to monitor the spatiotemporal dynamics of signaling

Rainer Waadt et al. – Coordination of signaling compound fluxes in roots

86 compounds. Genetically encoded fluorescent indicators (GEFIs) are currently the state-  
87 of-the-art technology for high resolution in vivo monitoring of biological processes  
88 (Grossmann et al., 2018; Hilleary et al., 2018; Walia et al., 2018). Although the number  
89 of GEFIs is steadily increasing, only a fraction has been introduced into plants, and less  
90 have been used in simultaneous multiparametric analyses (Okumoto et al., 2012;  
91 Kostyuk et al., 2018; Walia et al., 2018). To facilitate the use of GEFIs in  
92 multiparametric analyses, we introduce here the concept of dual-sensing genetically  
93 encoded fluorescent indicators (2-In-1-GEFIs) that enable the in vivo monitoring of at  
94 least two signaling compounds simultaneously. Through the genetic fusion of two  
95 distinct indicators, seven 2-In-1-GEFIs were generated that enable time-efficient and  
96 complementary in vivo analyses of ABA,  $\text{Ca}^{2+}$ ,  $\text{H}^+$ ,  $\text{Cl}^-$ ,  $\text{H}_2\text{O}_2$  and the glutathione redox  
97 potential ( $E_{\text{GSH}}$ ) at unprecedented spatiotemporal resolution. Microscopic analyses of these  
98 2-In-1-GEFIs in Arabidopsis roots confirmed their functionality and revealed that  
99 extracellularly applied ABA was rapidly taken up, but without discernible effect on  
100 cytosolic  $\text{Ca}^{2+}$  and pH levels. In contrast, treatments with glutamate, ATP, AtPEP1 and  
101 GSSG induced spatiotemporally overlapping fluxes of  $\text{Ca}^{2+}$ ,  $\text{H}^+$  and  $\text{Cl}^-$ , without  
102 noticeable rapid effect on the cytosolic redox state.

103

## 104 RESULTS

### 105 Approaches to optimize FRET-based ABA indicators

106 Currently available ABA indicators are ABACUS and ABAleon (Jones et al.,  
107 2014; Waadt et al., 2014). Because their expression in plants has an impact on ABA  
108 signaling and because they exhibit a relatively small signal-to-noise ratio (Waadt et al.,  
109 2015), we aimed to optimize these indicators before utilizing them for multiparametric  
110 analyses. As testing system, we chose human embryonic kidney (HEK293T) cells that  
111 allow for efficient medium throughput plate reader-based screens. Compared to  
112 ABAleon2.15 and ABACUS1-2 $\mu$  used as positive control and non-responsive  
113 ABAleon2.15nr as negative control, the initial screening aimed to evaluate deletion  
114 variants of ABAleon2.15 and various combinations of five fluorescent protein Förster



Rainer Waadt et al. – Coordination of signaling compound fluxes in roots

115 Resonance Energy Transfer (FRET)-pairs and three sensory domains (SDs; Figure 1A,  
116 Supplemental Figures 1A to 1D). 60 min after application of 0 or 100  $\mu$ M ABA,  
117 ABALeon2.15 deletion variants (d1-d3), as well as ABACUS1-2 $\mu$  and SD2 variants  
118 exhibited emission ratio changes even in control conditions. When compared to  
119 ABALeon2.15, two indicators (PmTurquoise-SD1-Venus and PmTurquoise-SD1-  
120 cpVenus173) exhibited neglectable responses to control treatments, but increased  
121 negative emission ratio changes in response to ABA (Figure 1A). Because  
122 PmTurquoise-SD1-cpVenus173 (ABALeonSD1-3) differed from ABALeon2.15 only in the  
123 sequences that link the sensory domain with the attached fluorescent proteins  
124 (Supplemental Figures 1A and 1D), an additional ABALeonSD1-3 linker screening was  
125 performed (Figure 1B). This led to the identification of ABALeonSD1-3L21 (linkers LD  
126 and T; Supplemental Figure 1E) with similar properties as ABALeonSD1-3 (Figure 1B).

127 To corroborate these findings, ABALeon2.15, ABALeonSD1-3 and ABALeonSD1-  
128 3L21 proteins were purified from *Escherichia coli* (*E. coli*) and characterized in vitro.  
129 Although all three ABALeons were functional (Figures 1C to 1G), their properties in vitro  
130 were markedly different from results obtained in HEK293T cells (Figures 1G to 1I).  
131 Basal emission ratios (at 0  $\mu$ M ABA) were not the same in both assay systems (Figures  
132 1G to 1H). ABALeon2.15 exhibited a higher ABA-induced emission ratio change in vitro,  
133 while ABALeonSD1-3 responses were larger in the HEK293T cell system (Figure 1I).  
134 ABALeonSD1-3L21 responded similar in vitro and in HEK293T cells (Figure 1I). In vitro  
135 calibrations revealed that ABALeonSD1-3 responded much weaker to ABA (maximum  
136 emission ratio change  $\Delta R_{(\max)}/R_0 = -0.141$ ) compared to ABALeon2.15 and  
137 ABALeonSD1-3L21 ( $\Delta R_{(\max)}/R_0 = -0.185$  and  $-0.167$ ) (Figures 1C to 1E). Apparent ABA  
138 affinities of ABALeonSD1-3 (954 nM) and ABALeonSD1-3L21 (938 nM) were slightly  
139 lower compared to ABALeon2.15 (817 nM) (Figure 1F). Altogether, the ABA indicator  
140 screening led to the identification of ABALeonSD1-3L21. Its advanced properties in  
141 HEK293T cells requires therefore further validation in planta.

## 142 Evaluation of FRET-based ABA indicators in Arabidopsis

143 5-day-old Arabidopsis seedlings expressing ABALeon2.15, ABALeonSD1-3L21 or  
144 ABACUS1-2 $\mu$  in the cytosol and nucleus were compared for their ABA responses in

145 roots. Therefore, spatiotemporal vertical response profiles of emission ratios (R; Figure  
146 2 top) or emission ratio changes normalized to 4 min average baseline recordings  
147 ( $\Delta R/R_0$ ; Figure 2 middle) and overall emission ratio changes (Figure 2 bottom) were  
148 acquired in response to 10  $\mu$ M ABA treatments. ABAleon2.15 and ABAleonSD1-3L21  
149 responded similar to ABA with a sigmoidal emission ratio decrease at a half response  
150 time of  $t_{1/2} \sim 15$  min (Figures 2A and 2B). Note that the calyptra exhibited a much  
151 weaker response to ABA compared to the other tissues, likely because of the high  
152 cytosolic ABA concentration ( $[ABA]_{\text{cyt}}$ ) there (depicted in dark blue; Figures 2A top and  
153 2B top). The root elongation zone however, exhibited the lowest  $[ABA]_{\text{cyt}}$  (depicted in  
154 white). ABACUS1-2 $\mu$  did not resolve this ABA concentration gradient, and responded  
155 slower ( $t_{1/2} \sim 29$  min), but with larger increasing emission ratio changes that were more  
156 pronounced in the meristematic- and early elongation zone (Figure 2C, Supplemental  
157 Movie 1). None of the indicators exhibited emission ratio changes in response to control  
158 treatments (Supplemental Figure 2). Altogether, we conclude that ABAleons are more  
159 suitable for ABA analyses in tissues with low  $[ABA]_{\text{cyt}}$ , whereas ABACUS1-2 $\mu$  should be  
160 preferably used in tissues with high  $[ABA]_{\text{cyt}}$ . Because both ABAleons exhibited similar  
161 ABA response patterns, we decided to employ the latest version ABAleonSD1-3L21 for  
162 our multiparameter imaging approach.

## 163 **Concept and design of dual-sensing genetically encoded fluorescent indicators** 164 **(2-In-1-GEFIs)**

165 Multiparametric analyses of signaling compounds requires the generation of  
166 transgenic plants that express several GEFIs simultaneously. Because the generation  
167 of transgenic plants is time-consuming and the insertion of multiple transgenes into the  
168 Arabidopsis genome often results in epigenetic silencing effects, we aimed to express  
169 two GEFIs from one mRNA. Therefore, GEFIs were genetically fused via sequences  
170 encoding for a 14 amino acid ASGGSGGTSGGGGS-linker (GSL), or the self-cleaving  
171 22 amino acid P2A linker that enables the expression of two separate polypeptides (Kim  
172 et al., 2011). Six GEFIs: ABAleonSD1-3L21 (ABA), R-GECO1 ( $\text{Ca}^{2+}$ ; Zhao et al., 2011),  
173 Arabidopsis codon optimized red-fluorescing (P)A-17 ( $\text{H}^+$ ; Shen et al., 2014),  $\text{E}^2\text{GFP}$  ( $\text{H}^+$   
174 and  $\text{Cl}^-$ ; Bizzarri et al., 2006), Grx1-roGFP2 ( $\text{E}_{\text{GSH}}$ ; Gutscher et al., 2008) and roGFP2-

Rainer Waadt et al. – Coordination of signaling compound fluxes in roots

175 Orp1 (H<sub>2</sub>O<sub>2</sub>; Gutscher et al., 2009) were combined for the generation of seven 2-In-1-  
176 GEFIs: ABAleonSD1-3L21-P2A-R-GECO1 (ABA and Ca<sup>2+</sup>), PA-17-P2A-ABALEonSD1-  
177 3L21 (H<sup>+</sup> and ABA), R-GECO1-GSL-E<sup>2</sup>GFP (Ca<sup>2+</sup>, H<sup>+</sup> and Cl<sup>-</sup>), PA-17-P2A-Grx1-  
178 roGFP2 (H<sup>+</sup> and E<sub>GSH</sub>), PA-17-P2A-roGFP2-Orp1 (H<sup>+</sup> and H<sub>2</sub>O<sub>2</sub>), R-GECO1-P2A-Grx1-  
179 roGFP2 (Ca<sup>2+</sup> and E<sub>GSH</sub>) and R-GECO1-P2A-roGFP2-Orp1 (Ca<sup>2+</sup> and H<sub>2</sub>O<sub>2</sub>). See  
180 Supplemental Data Sets 1B and 1C for information about constructs and transgenic  
181 Arabidopsis plants. In the following, we will describe the application of these 2-In-1-  
182 GEFIs in Arabidopsis and highlight the resulting biological findings.

### 183 **ABA does not trigger rapid Ca<sup>2+</sup> or pH changes in roots**

184 To test the functionality of the 2-In-1-GEFIs, we first studied the interrelation of  
185 ABA with Ca<sup>2+</sup> in roots. Therefore, ABAleonSD1-3L21-P2A-R-GECO1 seedlings were  
186 monitored in response to 10 μM ABA, which induced a typical ABAleonSD1-3L21  
187 emission ratio decrease (Figure 3A left). The Ca<sup>2+</sup> indicator R-GECO1 did not respond  
188 to this treatment (Figure 3A right). However, subsequent 1 μM indole-3-acetic-acid (IAA;  
189 auxin) treatment at 30 min induced a biphasic Ca<sup>2+</sup> signal that initiated in the root  
190 elongation zone and spread from there to neighboring regions (Figure 3A right,  
191 Supplemental Movie 2), as observed before (Waadt et al., 2017).

192 To investigate the effect of ABA on cytosolic pH, PA-17-P2A-ABALEonSD1-3L21  
193 seedlings were treated with 10 μM ABA. From 0-30 min after ABA treatment PA-17  
194 fluorescence remained unchanged (Figure 3B left). However, in response to 1 mM ATP  
195 PA-17 fluorescence emission decreased, indicating a rapid and transient cytosolic  
196 acidification with a maximum pH drop in the root meristematic zone that also spread to  
197 the elongation zone (Figure 3B left). In this experiment, ABAleonSD1-3L21 exhibited a  
198 typical ABA response pattern that was not affected by ATP (Figure 3B right,  
199 Supplemental Movie 3). These experiments established the functionality of both 2-In-1-  
200 GEFIs and revealed that ABA does not trigger rapid cytosolic Ca<sup>2+</sup> or pH changes in  
201 roots.

### 202 **Auxin, ATP and glutamate treatments trigger spatiotemporally overlapping fluxes** 203 **of Ca<sup>2+</sup>, H<sup>+</sup> and Cl<sup>-</sup>**

204           Next, we used R-GECO1-GSL-E<sup>2</sup>GFP to simultaneously monitor Ca<sup>2+</sup>, H<sup>+</sup> and Cl<sup>-</sup>  
205 fluxes. Because anions, such as Cl<sup>-</sup>, quench the fluorescence of E<sup>2</sup>GFP and because its  
206 excitation ratiometric pH readout is Cl<sup>-</sup> independent, E<sup>2</sup>GFP provides a means to  
207 simultaneously assess cytosolic H<sup>+</sup> and Cl<sup>-</sup> changes (Bizzarri et al., 2006; Arosio et al.,  
208 2010). In response to 1 μM IAA, R-GECO1 reported biphasic Ca<sup>2+</sup> signals in the root  
209 elongation zone that travelled to neighboring regions. Subsequent 1 mM ATP  
210 treatments triggered Ca<sup>2+</sup> signals in the calyptra and meristematic zone that proceeded  
211 shootward (Figure 4A left). Interestingly, both Ca<sup>2+</sup> signals coincided with a cytosolic  
212 acidification reported by E<sup>2</sup>GFP (Figure 4A middle, Supplemental Movie 4). IAA also  
213 induced a Cl<sup>-</sup> influx, indicated by a E<sup>2</sup>GFP fluorescence emission decrease in the entire  
214 imaged root, with a maximum decrease in the meristematic zone (Figure 4A right). ATP  
215 however induced Cl<sup>-</sup> influx in the upper elongation zone and above, but Cl<sup>-</sup> efflux in the  
216 lower elongation- and meristematic zone (Figure 4A right). Correlation analyses of the  
217 initial 15 min during the IAA response indicated a remarkable spatiotemporal overlap of  
218 Ca<sup>2+</sup>, H<sup>+</sup> and Cl<sup>-</sup> influx in the meristematic and elongation zone (Figure 4B).

219           In additional experiments, the effect of 1 mM glutamate was assessed.  
220 Compared to IAA, glutamate treatments triggered a more expanded and rapid Ca<sup>2+</sup>  
221 transient that arrived in a wave-like shape from upper root regions (Figure 5A left,  
222 Supplemental Movie 5). H<sup>+</sup> and Cl<sup>-</sup> also displayed a rapid and transient initial influx with  
223 a maximum acidification in the meristematic zone, followed by a weak transient  
224 alkalization in the early elongation zone and a prolonged H<sup>+</sup> and Cl<sup>-</sup> influx (Figure 5A  
225 left, Supplemental Movie 5). During the initial 10 min of the glutamate response, Ca<sup>2+</sup>  
226 and H<sup>+</sup> influx exhibited a noticeable spatiotemporal overlap/correlation in the  
227 meristematic- and early elongation zone (Figure 5B left). Subsequent responses to  
228 ATP, used as positive control, were as observed before (Figures 4A and 5A).  
229 Correlation analyses indicated a remarkable coincidence of Ca<sup>2+</sup> and H<sup>+</sup> influx and Cl<sup>-</sup>  
230 efflux in the meristematic zone (Figure 5B right).

231           In order to increase the spatial resolution for pH measurements, R-GECO1-P2A-  
232 E<sup>2</sup>GFP was fused to the N-terminus of LOW TEMPERATURE INDUCED PROTEIN 6B  
233 (LTI6b) or VESICLE TRANSPORT V-SNARE 11 (VTI11). This enabled the targeting of  
234 E<sup>2</sup>GFP to the cytosolic side of the plasma membrane (LTI6b; Cutler et al., 2000) or the

Rainer Waadt et al. – Coordination of signaling compound fluxes in roots

235 tonoplast (VTI11; Takemoto et al., 2018), while R-GECO1 remained in the cytosol and  
236 the nucleus (Supplemental Figures 3A and 4A). Compared to previous analyses (Figure  
237 5), these indicators reported very similar  $\text{Ca}^{2+}$  and pH response patterns, irrespective of  
238 the subcellular localization of  $\text{E}^2\text{GFP}$ . However, it appeared that  $\text{Cl}^-$  responses were  
239 more variable with noticeably higher  $\text{Cl}^-$  fluxes at the tonoplast (Supplemental Figures  
240 3B and 4B). Note that R-GECO1-P2A- $\text{E}^2\text{GFP}$ -LTI6b expression induced more severe  
241 growth defects in Arabidopsis compared to the other GEFI lines (Supplemental Figure  
242 5). Therefore, results obtained with this GEFI should be interpreted with caution. Taken  
243 together, R-GECO1-GSL- $\text{E}^2\text{GFP}$  enables the simultaneous monitoring of  $\text{Ca}^{2+}$ ,  $\text{H}^+$  and  
244  $\text{Cl}^-$  fluxes, that in response to IAA, ATP and glutamate exhibited a remarkably high  
245 spatiotemporal overlap.

#### 246 **Glutamate treatment induces cytosolic acidification without noticeable impact on** 247 **the cytosolic redox state**

248 To test whether glutamate has an impact on the cytosolic redox state,  
249 Arabidopsis seedlings expressing PA-17-P2A-Grx1-roGFP2 (pH and  $E_{\text{GSH}}$ ) or PA-17-  
250 P2A-roGFP2-Orp1 (pH and  $\text{H}_2\text{O}_2$ ) were exposed to 1 mM glutamate and 100  $\mu\text{M}$   $\text{H}_2\text{O}_2$   
251 treatments as positive control. As observed before, glutamate triggered a biphasic  
252 cytosolic acidification, that prolonged during the 100  $\mu\text{M}$   $\text{H}_2\text{O}_2$  response (Figures 6A left  
253 and 6B left, Supplemental Movies 6 and 7). Application of glutamate did not induce  
254 cytosolic redox changes. Whereas, 100  $\mu\text{M}$   $\text{H}_2\text{O}_2$  treatments triggered a steep cytosolic  
255 oxidation that remained high for longer than 30 min (Figures 6A right and 6B right).  
256 During this response, the roGFPs indicated a cytosolic oxidation predominantly in  
257 epidermis and cortex cells of the elongation zone and above, with faster responses in  
258 upper root regions. Except of the epidermis, cells of the meristematic zone only slightly  
259 increased their redox state in response to  $\text{H}_2\text{O}_2$  (Supplemental Movies 6 and 7).  
260 Altogether, these data indicate that 100  $\mu\text{M}$   $\text{H}_2\text{O}_2$  treatments rapidly induce cytosolic  
261 oxidation, and that the root meristematic zone is less sensitive to this oxidative stress.

#### 262 **$\text{H}_2\text{O}_2$ treatment triggers spatiotemporally overlapping but also distinct patterns of** 263 **cytosolic oxidation and $\text{Ca}^{2+}$ fluxes**

264 Current models propose an interdependence of  $\text{Ca}^{2+}$ - and ROS signaling (Gilroy  
265 et al., 2014; Steinhorst and Kudla, 2014). To investigate the spatiotemporal  
266 relationships of cytosolic  $\text{Ca}^{2+}$  and ROS signals, we first treated Arabidopsis seedlings  
267 expressing R-GECO1-P2A-Grx1-roGFP2 ( $\text{Ca}^{2+}$  and  $E_{\text{GSH}}$ ) or R-GECO1-P2A-roGFP2-  
268 Orp1 ( $\text{Ca}^{2+}$  and  $\text{H}_2\text{O}_2$ ) with 20 and 100  $\mu\text{M}$   $\text{H}_2\text{O}_2$ . The  $E_{\text{GSH}}$  and  $\text{H}_2\text{O}_2$  indicators  
269 responded to both treatments with similar patterns, albeit with increased signal changes  
270 in response to 100  $\mu\text{M}$   $\text{H}_2\text{O}_2$  (Figures 7A right and 7B right, Supplemental Movies 8 and  
271 9). Although 20  $\mu\text{M}$   $\text{H}_2\text{O}_2$  treatments induced a detectable cytosolic oxidation,  
272 discernible  $\text{Ca}^{2+}$  signals were not observed (Figure 7, Supplemental Movies 8 and 9). In  
273 response to 100  $\mu\text{M}$   $\text{H}_2\text{O}_2$  treatments, cytosolic oxidation preceded detectable  $\text{Ca}^{2+}$   
274 signals. Although, both signals appeared to arrive from upper root regions,  $\text{Ca}^{2+}$  signals  
275 in the elongation zone exhibited a maximum response in the vasculature, whereas  
276 cytosolic oxidation was more pronounced in epidermis and cortex cells. Both signals  
277 exhibited a minimum response in the meristematic zone (Figure 7, Supplemental  
278 Movies 8 and 9). We conclude that these 2-In-1-GEFIs exhibit sufficient sensitivity for  
279 resolving the interrelation of cytosolic  $\text{Ca}^{2+}$  and ROS signals, which, in response to 100  
280  $\mu\text{M}$   $\text{H}_2\text{O}_2$  treatments, exhibit overlapping but not similar spatiotemporal response  
281 patterns. In addition, the roGFPs facilitate the detection of cytosolic oxidation in  
282 response to  $\text{H}_2\text{O}_2$  below the threshold of  $\text{Ca}^{2+}$  channel activation.

### 283 **ATP and AtPEP1 treatments trigger $\text{Ca}^{2+}$ , $\text{H}^+$ and $\text{Cl}^-$ fluxes, and a weak cytosolic** 284 **oxidation**

285 Extracellular ATP and the signaling peptide AtPEP1 function as damage-  
286 associated elicitors that trigger  $\text{Ca}^{2+}$  signals and ROS production (Song et al., 2006;  
287 Demidchik et al., 2009; Ma et al., 2014). To investigate the spatiotemporal relationships  
288 of these processes, Arabidopsis seedlings expressing R-GECO1 and roGFP2-Orp1 or  
289 Grx1-roGFP2 from individual expression cassettes located on one T-DNA, were  
290 subjected to 1 mM ATP and consecutive 100  $\mu\text{M}$   $\text{H}_2\text{O}_2$  treatments as positive control.  
291 ATP triggered typical  $\text{Ca}^{2+}$  responses, but its effect on the cytosolic redox state was  
292 rather weak (Figure 8A, Supplemental Figure 6A). 100  $\mu\text{M}$   $\text{H}_2\text{O}_2$  treatments induced  
293  $\text{Ca}^{2+}$  fluxes and cytosolic oxidation as observed before (Supplemental Movies 10 and



294 12). Experiments using R-GECO1-P2A-roGFP2-Orp1 and R-GECO1-P2A-Grx1-  
295 roGFP2 revealed that 1  $\mu\text{M}$  (At)PEP1 treatments induced  $\text{Ca}^{2+}$  signals that initiated in  
296 epidermis cells, followed by an overall  $\text{Ca}^{2+}$  burst, after which  $\text{Ca}^{2+}$  oscillations in the  
297 meristem appeared that proceeded to the vasculature and further shootward. However,  
298 PEP1 treatments had only weak effects on the cytosolic redox state (Figure 8B,  
299 Supplemental Figure 6B, Supplemental Movies 11 and 13). To better resolve the roGFP  
300 responses, the initial 30 min signal change response profiles were extracted from  
301 original data sets and calibrated to the same color scale. The data indicate a detectable  
302 cytosolic oxidation in response to glutamate, ATP and PEP1 that was however low  
303 compared to the 20  $\mu\text{M}$   $\text{H}_2\text{O}_2$  response (Supplemental Figure 7). We also investigated  
304 the effect of PEP1 using R-GECO1-GSL-E<sup>2</sup>GFP. 1  $\mu\text{M}$  PEP1 triggered a transient  $\text{Ca}^{2+}$ ,  
305  $\text{H}^+$  and  $\text{Cl}^-$  influx that, during the initial 20 min of the response, exhibited a  
306 spatiotemporal overlap/correlation mainly in the meristematic- and elongation zone  
307 (Figures 9A and 9B, Supplemental Movie 14). Altogether, these experiments  
308 established that PEP1 triggers spatiotemporally overlapping  $\text{Ca}^{2+}$ ,  $\text{H}^+$  and  $\text{Cl}^-$  fluxes in  
309 roots. Whereas, the effect of PEP1 and ATP on the cytosolic redox state was below the  
310 threshold of ROS-induced  $\text{Ca}^{2+}$  signaling (Supplemental Figure 7).

311 **Glutathione disulfide (GSSG) treatments trigger rapid  $\text{Ca}^{2+}$ ,  $\text{H}^+$  and  $\text{Cl}^-$  fluxes that**  
312 **precede a slow-progressing cytosolic oxidation**

313 GSSG is known to trigger cytosolic  $\text{Ca}^{2+}$  signals (Gomez et al., 2004) and to  
314 directly oxidize Grx1-roGFP2 (Gutscher et al., 2008). We sought to resolve the  
315 spatiotemporal relations of these responses in Arabidopsis seedlings expressing R-  
316 GECO1-P2A-Grx1-roGFP2. Although 1 mM GSSG-induced  $\text{Ca}^{2+}$  signals were variable,  
317 they appeared to arrive from upper root regions and travelled towards the root tip,  
318 followed by a second  $\text{Ca}^{2+}$  burst in the vasculature and oscillations in the meristematic-  
319 and elongation zone (Figure 10A left, Supplemental Movie 15). After the initial  $\text{Ca}^{2+}$   
320 signal reached the root tip, in this region a cytosolic oxidation was observed that slowly  
321 progressed towards the elongation zone, where oscillation became visible (Figure 10A  
322 right, Supplemental Movie 15). Note that the  $\text{Ca}^{2+}$  and  $E_{\text{GSH}}$  oscillations were shifted in  
323 phase (Supplemental Movie 15). Additional experiments using R-GECO1-GSL-E<sup>2</sup>GFP



Rainer Waadt et al. – Coordination of signaling compound fluxes in roots

324 revealed that GSSG treatments also induced H<sup>+</sup> and Cl<sup>-</sup> influx, exhibiting the most  
325 noticeable spatiotemporal overlap with Ca<sup>2+</sup> signals in the meristematic- and early  
326 elongation zone during the initial 20 min of the GSSG response (Figures 10B and 10C,  
327 Supplemental Movie 16). In summary, GSSG treatments trigger Ca<sup>2+</sup> signals, cytosolic  
328 acidification and Cl<sup>-</sup> influx that precede a cytosolic oxidation.

329

## 330 **DISCUSSION**

### 331 **Optimization of ABA indicators in HEK293T cells**

332 Optimization procedures of FRET-based indicators usually comprise the testing  
333 of FRET-pair-, sensory domain- and linker variants (Okumoto et al., 2012; Hochreiter et  
334 al., 2015). Although such testing has been performed on ABACUS, the linkers between  
335 the sensory domain and attached fluorescent proteins remained invariant (Jones et al.,  
336 2014). Early optimizations of ABAleon focused on sensory domain modifications that led  
337 to the development of ABAleon2.15 with improved stereospecificity for (+)-ABA (Waadt  
338 et al., 2014). Using the HEK293T cell system, we have developed ABAleonSD1-3L21  
339 that exhibits an improved signal-to-noise ratio compared to ABAleon2.15 (Figure 1B).  
340 HEK293T cells are a convenient system for GEFI screenings, because they can be  
341 easily transfected, cultivated and analyzed in a plate reader (Tian et al., 2009).  
342 HEK293T cells contain neglectable ABA levels, and are therefore well suited for ABA  
343 indicator screenings with a potential to facilitate the heterologous characterization of  
344 ABA transporters using ABA indicators. Successful characterizations of plasma  
345 membrane proteins in HEK293T cells has been demonstrated for RBOHs and CYCLIC  
346 NUCLEOTIDE-GATED ION CHANNEL (CNGC)-type Ca<sup>2+</sup> channels (Gao et al., 2016;  
347 Han et al., 2019). The differences of ABAleon characteristics between HEK293T cell  
348 and in vitro analyses might be due to a lower stability of ABAleon2.15 in HEK293T cells.  
349 Similar issues have been reported for Ca<sup>2+</sup> indicators (Tian et al., 2009). However, in  
350 vitro characterizations of ABA indicators are time-consuming, and screenings using *E.*  
351 *coli* are not practical due to a likely even lower protein stability in this system (Jones et  
352 al., 2014; Waadt et al., 2014). Note that previously measured properties of ABAleon2.15

Rainer Waadt et al. – Coordination of signaling compound fluxes in roots

353 ( $\Delta R_{(\max)}/R_0 \sim -0.10$  and  $k'_d \sim 500$  nM; Waadt et al., 2014) were different compared to  
354 results in Figures 1C and 1F. Here we used a faster sandwich-tag purification procedure  
355 with subsequent characterization of freshly purified proteins that might give more  
356 reliable results.

357 ABAleon2.15 and ABAleonSD1-3L21 exhibited similar ABA responses in  
358 Arabidopsis. ABACUS1-2 $\mu$  responded slower to ABA and did not resolve the ABA  
359 gradient in roots (Figure 2, Supplemental Figure 2), probably due to the lower ABA  
360 affinity (Jones et al., 2014). However, this indicator might have advantages for the  
361 analyses of ABA dynamics in the root tip, the root-hypocotyl junction and in guard cells,  
362 where ABAleons are close to saturation (Figure 2; Waadt et al., 2015). In the future,  
363 optimization of ABA indicators will require the development of alternative sensory  
364 domains and the investigation of alternative biosensor designs.

## 365 **2-In-1-GEFIs facilitate simultaneous multiparametric analyses**

366 Multiplexed live imaging in plants has been performed via the combination of  
367 GEFIs with fluorescent dyes, the use of GEFIs in parallel experiments, or through dual-  
368 expression of Ca<sup>2+</sup> indicators (Monshausen et al., 2007, 2009, 2011; Loro et al., 2012;  
369 Schwarzländer et al., 2012; Ngo et al., 2014; Keinath et al., 2015; Behera et al., 2018;  
370 Kelner et al., 2018; Wagner et al., 2019). However, GEFI-based simultaneous analyses  
371 of two signaling compounds has been established in Arabidopsis only for Ca<sup>2+</sup> and ABA  
372 (Waadt et al., 2017). Because most GEFIs are FRET- or green fluorescent protein-  
373 based, simultaneous multiparametric analyses have become possible through the  
374 development of red fluorescent protein-based indicators for Ca<sup>2+</sup>, redox/H<sub>2</sub>O<sub>2</sub> and pH  
375 (Bilan and Belousov, 2017; Martynov et al., 2018; Walia et al., 2018). Yet, except for R-  
376 GECO1, their application in plants is rare. Here, we introduced the intensimetric red  
377 fluorescing pH indicator (P)A-17 (Shen et al., 2014), which is well suited for pH analyses  
378 in Arabidopsis with similar responsiveness compared to the ratiometric E<sup>2</sup>GFP (Figures  
379 3B left, 4A middle and 5A middle).

380 As the generation of stable transgenic organisms is time-consuming,  
381 simultaneous expression of GEFIs, or the generation of dual-sensing GEFIs, is  
382 advantageous. Moreover, the latter approach minimizes epigenetic silencing effects,

383 often observed in lines carrying multiple transgenes. Dual-sensing GEFIs have been  
384 developed for pH and Cl<sup>-</sup> (ClopHensor; Arosio et al., 2010) and for phosphatidylinositol  
385 3,4,5-trisphosphate localization and H<sub>2</sub>O<sub>2</sub> concentration (PIP-SHOW; Mishina et al.,  
386 2012). For the generation of our 2-In-1-GEFIs we were inspired by ClopHensor and the  
387 incorporated E<sup>2</sup>GFP that we fused with R-GECO1 in analogy to R-GECO1-GSL-  
388 mTurquoise (Waadt et al., 2017). Note that recent studies indicated that  
389 ClopHensor/E<sup>2</sup>GFP might also respond to NO<sub>3</sub><sup>-</sup> (<https://doi.org/10.1101/716050>).  
390 Because our imaging buffer contained 5 mM Cl<sup>-</sup> and the microscope-dish agarose  
391 media contained 4 mM NO<sub>3</sub><sup>-</sup>, the observed E<sup>2</sup>GFP responses likely depended on both  
392 anion species. In contrast to R-GECO1-GSL-E<sup>2</sup>GFP, the other 2-In-1-GEFIs have been  
393 linked via the self-cleaving P2A-peptide, which enables efficient cleavage in Arabidopsis  
394 (Burén et al., 2012; Supplemental Figures 3 and 4). In addition, P2A-based 2-In-1-  
395 GEFIs exhibit similar responses compared to indicators expressed from separate  
396 expression cassettes (Figure 8, Supplemental Figure 6). Because only one expression  
397 cassette is used, P2A-linked GEFIs can be more easily screened at the microscope and  
398 are less prone to unwanted silencing effects. Our work established several 2-In-1-GEFIs  
399 based on the P2A-linkage, which is applicable to any eukaryotic system (Kim et al.,  
400 2011).

#### 401 **Ca<sup>2+</sup>, H<sup>+</sup> and anion fluxes exhibit a high spatiotemporal overlap**

402 Previous work established that mechanical stimulation, wounding, ATP and auxin  
403 simultaneously induce Ca<sup>2+</sup> and H<sup>+</sup> fluxes (Monshausen et al., 2009, 2011; Behera et  
404 al., 2018). We found that, in addition to auxin and ATP, also glutamate, PEP1 and  
405 GSSG trigger Ca<sup>2+</sup>, H<sup>+</sup> and anion fluxes with high spatiotemporal overlap (Figures 4, 5,  
406 9 and 10). The linkage of Ca<sup>2+</sup> and H<sup>+</sup> fluxes may depend on H<sup>+</sup> pumps and Ca<sup>2+</sup>/H<sup>+</sup>-  
407 coupled transport via CATION/PROTON EXCHANGERS (CAXs) or Ca<sup>2+</sup>-ATPases  
408 (Bonza and De Michelis, 2011; Pittman and Hirschi, 2016). However, knowledge about  
409 their role in Ca<sup>2+</sup> signaling is fragmentary, probably due to functional overlap of gene  
410 family members (Behera et al., 2018). Simultaneous Ca<sup>2+</sup> and H<sup>+</sup> fluxes in response to  
411 auxin are mediated by the auxin/H<sup>+</sup>-symporter AUXIN RESISTANT 1 (AUX1) and the  
412 Ca<sup>2+</sup> channel CNGC14 that are functionally coupled (Shih et al., 2015; Dindas et al.,

413 2018). Since the activation of plasma membrane H<sup>+</sup>-ATPases is coupled to AUX1  
414 (Inoue et al., 2016), this could explain the subsequent H<sup>+</sup>-efflux.

415 Mechanical stimulation-induced Ca<sup>2+</sup> and H<sup>+</sup> fluxes depend on the RECEPTOR-  
416 LIKE KINASE (RLK) FERONIA, which acts as a receptor for RAPID ALKALIZATION  
417 FACTOR (RALF) peptides (Haruta et al., 2014; Shih et al., 2014; Stegmann et al.,  
418 2017). Several RLKs, including the ATP receptor DOES NOT RESPOND TO  
419 NUCLEOTIDES 1 (DORN1) and PEP RECEPTORS (PEPRs), can induce Ca<sup>2+</sup> signals,  
420 apoplastic alkalization (coupled to cytosolic acidification), and ROS production (Qi et al.,  
421 2010; Choi et al., 2014; Ma et al., 2014; Seybold et al., 2014; Haruta et al., 2015; Chen  
422 et al., 2017; Kimura et al., 2017). The effect of DORN1 and PEPRs on anion efflux was  
423 observed in guard cells during stomatal closure (Chen et al., 2017; Zheng et al., 2018).  
424 Our analyses revealed that PEP1 induced a transient anion influx along the entire  
425 imaged root axis. Extracellular ATP triggered anion influx in the differentiation- and  
426 elongation zone, but efflux in the meristematic zone (Figure 9). Early research revealed  
427 that cytosolic but not extracellular ATP is required for adenine nucleotide activation of  
428 R-type anion channels (Hedrich et al., 1990) and protein kinase-mediated activation of  
429 S-type anion channels (Schmidt et al., 1995). It is likely that ATP-triggered Ca<sup>2+</sup> signals  
430 activate Ca<sup>2+</sup>-dependent protein kinases required for the activation of anion channels  
431 (Mori et al., 2006). The differences in PEP1- and ATP-induced anion fluxes in roots  
432 might be due to the distinct Ca<sup>2+</sup> signatures observed in the meristematic zone (Figure  
433 9). In the future, it will be interesting to discriminate the differences in anion-flux  
434 regulation between roots and guard cells.

### 435 **On the interdependence of Ca<sup>2+</sup> and ROS signaling**

436 The interdependence of Ca<sup>2+</sup> and ROS signaling has been extensively discussed  
437 (Gilroy et al., 2014; Steinhorst and Kudla, 2014). In the context of long-distance and  
438 systemic signaling, current models propose that Ca<sup>2+</sup> signals trigger the ion channel  
439 TPC1 for signal amplification. Ca<sup>2+</sup> signal propagation occurs via plasmodesmata or  
440 Ca<sup>2+</sup>-dependent activation of RBOHs. RBOH-derived extracellular ROS propagate to  
441 adjacent cells to activate plasma membrane localized Ca<sup>2+</sup> channels (Evans et al.,  
442 2016; Choi et al., 2016). Ca<sup>2+</sup>-dependent activation of RBOHs is well established

Rainer Waadt et al. – Coordination of signaling compound fluxes in roots

443 (Kadota et al., 2015; Han et al., 2019). However, whether RBOH-dependent ROS  
444 contribute to Ca<sup>2+</sup> channel activation, has only been inferred from pharmacological- and  
445 genetic analyses (Kwak et al., 2003; Evans et al., 2016). In *Arabidopsis* guard cells,  
446 hyperpolarization-activated Ca<sup>2+</sup>-permeable channels can be activated by 50 μM H<sub>2</sub>O<sub>2</sub>  
447 (Pei et al., 2000). In *Vicia faba* guard cells such channels exhibit a half response at 76  
448 μM H<sub>2</sub>O<sub>2</sub> (Köhler et al., 2003). Analyses in root epidermis cells revealed a Ca<sup>2+</sup> channel  
449 activation by 10 μM H<sub>2</sub>O<sub>2</sub> in the elongation zone and by 1 mM H<sub>2</sub>O<sub>2</sub> in the maturation  
450 zone (Demidchik et al., 2007). The threshold concentrations of ROS required to activate  
451 Ca<sup>2+</sup> channels may depend on the cell type, the location (apoplast or cytosol) and the  
452 chemical nature of ROS (Demidchik et al., 2007).

453 Our analyses revealed that in *Arabidopsis* roots 20 μM extracellular H<sub>2</sub>O<sub>2</sub>  
454 triggered a detectable cytosolic oxidation, but no considerable Ca<sup>2+</sup> signals (Figure 7).  
455 On the other hand, glutamate, ATP and PEP1, which efficiently trigger Ca<sup>2+</sup> signals,  
456 induced a cytosolic oxidation rather below this threshold (Supplemental Figure 7).  
457 These data are consistent with a slow progressing cytosolic oxidation in response to the  
458 pathogen-associated molecular pattern flagellin fragment flg22 (Nietzel et al., 2019).  
459 Whether such cytosolic oxidation is Ca<sup>2+</sup> dependent, requires further experimentation.  
460 However, compared to 20 μM H<sub>2</sub>O<sub>2</sub> responses, our data suggest that glutamate-, ATP-  
461 and PEP1-induced cytosolic oxidation is not sufficient to trigger root Ca<sup>2+</sup> channels  
462 (Supplemental Figure 7). We hypothesize that the observed ROS dependence of Ca<sup>2+</sup>  
463 signaling may be indirectly linked to the impact of ROS on the cell wall, which binds  
464 considerable amounts of Ca<sup>2+</sup> in Ca<sup>2+</sup>-pectate cross-linked complexes (Hepler et al.,  
465 2010; Peaucelle et al., 2012; Kärkönen and Kuchitsu, 2015). Such a model would be  
466 consistent with a rather slow H<sub>2</sub>O<sub>2</sub> activation of Ca<sup>2+</sup> channels in patch clamp analyses  
467 (20-60 min; Demidchik et al., 2007). Another possibility would be that a signaling  
468 component triggers both, Ca<sup>2+</sup> and ROS signaling. The BOTRYTIS-INDUCED KINASE  
469 1 (BIK1) could be a good candidate for such a mechanism (Kadota et al., 2014; Li et al.,  
470 2014; Kimura et al., 2017; Tian et al., 2019).

## 471 **Conclusions**

Rainer Waadt et al. – Coordination of signaling compound fluxes in roots

472 Our work established 2-In-1-GEFI-based simultaneous multiparametric in vivo  
473 analyses of signaling compounds in Arabidopsis. Using the 2-In-1-GEFIs, we observed  
474 that in roots ABA does not trigger rapid  $\text{Ca}^{2+}$  or pH changes. Whereas, auxin,  
475 glutamate, ATP, PEP1 and GSSG induce  $\text{Ca}^{2+}$ ,  $\text{H}^+$  and anion fluxes with high  
476 spatiotemporal overlap (Figure 11, Supplemental Figure 8). These results suggest an  
477 interdependence and coordination of ion fluxes that need to be dissected in future  
478 research. Findings that glutamate-, ATP- and PEP1-induced cytosolic oxidation is below  
479 the threshold required for triggering  $\text{Ca}^{2+}$  channels argue against the current model of a  
480 ROS-assisted  $\text{Ca}^{2+}$  signal propagation mechanism (Evans et al., 2016). We hypothesize  
481 that ROS may have an indirect effect on  $\text{Ca}^{2+}$  signaling. Overall, 2-In-1-GEFI-based  
482 imaging will allow for high resolution in vivo analyses of signaling processes beyond the  
483 model plant Arabidopsis.

484

## 485 **METHODS**

### 486 **Generation of plasmids**

487 Oligonucleotides used for cloning procedures (Supplemental Data Set 1A) were  
488 obtained from Eurofinsgenomics. Plasmids (Supplemental Data Set 1B) were  
489 constructed using classical cloning procedures and the GreenGate system  
490 (Lampropoulos et al., 2013) utilizing enzymes from Thermo Fisher Scientific.  
491 Arabidopsis codon-optimized DNA fragments of PmTurquoise and PA-17 were  
492 designed using GeneArt™ gene synthesis (Thermo Fisher Scientific). Expression of  
493 GEFIs in *Arabidopsis thaliana* Col-0 was carried out utilizing the promoter of a  
494 ubiquitous and highly expressed reference gene *ASPARTIC PROTEASE A1* (*APA1*,  
495 AT1G11910) that was chosen based on searches using Genevestigator (Hruz et al.,  
496 2008). The expression cassette also included the terminator of the *HEAT SHOCK*  
497 *PROTEIN 18.2* (*HSP18.2*) gene (AT5G59720; Nagaya et al., 2010; Waadt et al., 2014).

### 498 **Optimization of ABA indicators in HEK293T cells**



Rainer Waadt et al. – Coordination of signaling compound fluxes in roots

499 Transformation and cultivation of HEK293T cells was performed as described  
500 previously (Ogasawara et al., 2008; Zhang et al., 2018). Spectral characteristics of ABA  
501 indicators were recorded in Greiner flat bottom 96-well plates (Greiner BIO-ONE) using  
502 a TECAN Safire plate reader (TECAN) operated by the XFLUOR4.51 software with the  
503 following parameters: fluorescence emission scan bottom mode; excitation wavelength  
504 440 nm, bandwidth 12.5 nm; emission wavelength scan from 460-600 nm, bandwidth 10  
505 nm; gain 100-115; flashes 10; integration time 40-60  $\mu$ s; temperature 37 °C. HEK293T  
506 cells were kept in Hanks Balanced Salt Solution (HBSS; Thermo Fisher Scientific) and  
507 fluorescence emission spectra were recorded before ( $t_0$ ) and 60 min ( $t_{60}$ ) after exchange  
508 of solution to either HBSS with 100  $\mu$ M ( $\pm$ )-ABA (Merck) and 0.1 % EtOH (treatment) or  
509 HBSS with 0.1 % EtOH (solvent control). ABA indicator emission ratios (R) were  
510 calculated as average emission at 518-538 nm divided by average emission at 470-490  
511 nm after subtraction of the non-transfected HEK293T cell background emission  
512 spectrum. Emission ratio change ( $\Delta R/R_0$ ) was calculated as  $[R(t_{60})-R(t_0)]/R(t_0)$ .  
513 Experiments were performed in triplicates.

#### 514 **Purification and in vitro characterization of ABAleons**

515 BL21-CodonPlus (DE3)-RIL cells transformed with pET28-6xHis-ABAlleon-  
516 (P)StrepII constructs were shaken at 150 rpm and 37 °C in 2x 1 L Luria Broth (LB)  
517 media supplemented with 50  $\mu$ g mL<sup>-1</sup> kanamycin and 30  $\mu$ g mL<sup>-1</sup> chloramphenicol. At an  
518 optical density (OD<sub>600</sub>) of 0.5, 1 mM Isopropyl  $\beta$ -D-1-thiogalactopyranoside (IPTG; Carl  
519 Roth) was added and protein expression was conducted in a shaking incubator at 24 °C  
520 for 6 h. Cultured cells were harvested by several centrifugation steps at 4 °C and 4000  
521 rpm and bacterial pellet was flash frozen in liquid N<sub>2</sub> and stored at - 80 °C.

522 The bacterial pellet was thawed on ice and resuspended in 30 mL lysis buffer (1x  
523 PBS [137 mM NaCl, 2.7 mM KCl, 10 mM Na<sub>2</sub>HPO<sub>4</sub>, 1.8 mM KH<sub>2</sub>PO<sub>4</sub>], 10 mM imidazole  
524 [Merck], 1x Roche protease inhibitor EDTA-free, 1 mM Phenylmethylsulfonyl fluoride  
525 [PMSF; Carl Roth] and 1 mg mL<sup>-1</sup> lysozym [VWR], pH 7.4). After 40-60 min incubation  
526 on ice, cells were disrupted through microtip-based sonication (25 % amplitude, 21x 20  
527 s) and cell debris were removed by centrifugation (2x 30 min, 20000 g, 4 °C) and  
528 filtering through 0.45  $\mu$ m syringe filters (Merck).



Rainer Waadt et al. – Coordination of signaling compound fluxes in roots

529           6x-His purification was conducted in 20 mL gravity columns (VWR) loaded with 4  
530 mL HisPur™ Ni-NTA resin (Thermo Fisher Scientific). After binding of proteins to the Ni-  
531 NTA resin, columns were washed 5x with 10 mL His-wash buffer (1x PBS, 25 mM  
532 imidazole, pH 7.4) and proteins were eluted in 3x 2 mL His-elution buffer (1x PBS, 250  
533 mM imidazole, pH 7.4). Purified proteins were then loaded onto a 20 mL gravity column  
534 supplemented with 3 mL 50 % Strep Tactin Superflow (IBA). After 4x washing with 7.5  
535 mL SII-wash buffer 1 (30 mM Tris/HCl pH 7.4, 250 mM NaCl) and 3x washing with 7.5  
536 mL SII-wash buffer 2 (30 mM Tris/HCl pH 7.4, 250 mM NaCl, 10 mM MgCl<sub>2</sub>, 1 mM  
537 MnCl<sub>2</sub>), proteins were eluted in 3x 1.5 mL SII-elution buffer (30 mM Tris/HCl pH 7.4, 250  
538 mM NaCl, 10 mM MgCl<sub>2</sub>, 1 mM MnCl<sub>2</sub>, 2.5 mM desthiobiotin [IBA]) and concentrated to  
539 a final volume of about 1 mL using Amicon Ultra-4 30 K filters (Merck). Purity of proteins  
540 was analyzed by SDS-PAGE using 10 % Mini-PROTEAN® TGX™ Precast Gels  
541 (BioRad) and InstantBlue staining (Expedeon). In a similar procedure, protein yield was  
542 calculated according to a bovine serum albumin standard curve.

543           For vitro calibration, a 100 mM (+)-ABA (TCI) stock solution dissolved in 100 %  
544 EtOH was used for an ABA dilution series in SII-wash buffer 2 and 0.2 % EtOH. 10 µL  
545 of each ABA dilution were added to 3 wells of black flat bottom µclear® 96-well plates  
546 (Greiner BIO-ONE) containing 90 µL of ~ 1.1 µM ABALeon protein, diluted in SII-wash  
547 buffer 2, or to 90 µL SII-wash buffer 2 alone as background control. Fluorescence  
548 emission spectra were recorded after 20 min incubation at room temperature in the dark  
549 using a TECAN Infinite M1000 plate reader (TECAN) operated by the i-control 1.10.4.0  
550 software with the following parameters: fluorescence emission scan bottom mode;  
551 excitation wavelength 440 nm, bandwidth 10 nm; emission wavelength scan from 460-  
552 650 nm, bandwidth 10 nm; gain 98-104, flashes 10 at 100 Hz, integration time 60 µs,  
553 temperature 21-22 °C. ABA-dependent ABALeon emission ratios (R) were calculated as  
554 described above. Maximum emission ratio change ( $\Delta R_{(max)}/R_0$ ) was calculated as [R(at  
555 20 µM ABA)-R(at 0 µM ABA)]/R(at 0 µM ABA). Apparent ABA affinities ( $k'_d$ ; EC50) of  
556 ABALeons were calculated by fitting the emission ratio values of all three replicates to a  
557 4-parameter logistic function using OriginPro 2018 (OriginLab Corporation).

## 558 **Generation of transgenic Arabidopsis plants expressing GEFIs**

Rainer Waadt et al. – Coordination of signaling compound fluxes in roots

559 *Agrobacterium* strain ASE containing the pSOUP helper plasmid and the  
560 respective plant expression vectors (Supplemental Data Set 1B) were used for  
561 transformation of *Arabidopsis thaliana* ecotype Col-0 by floral dip (Clough & Bent, 1998)  
562 to generate the transgenic lines listed in Supplemental Data Set 1C. Seeds of  
563 transformed plants were surface sterilized for 10-15 min in 70 % EtOH, washed three  
564 times with 100 % EtOH and sowed on half-strength Murashige & Skoog (0.5 MS) media  
565 (Duchefa) supplemented with 5 mM MES-KOH pH 5.8, 0.8 % phytoagar (Duchefa) and  
566 10  $\mu\text{g mL}^{-1}$  Glufosinate-ammonium or 25  $\mu\text{g mL}^{-1}$  hygromycin B (Merck) for herbicide  
567 selection. After 3-6 days of stratification in the dark at 4 °C, transgenic plants were  
568 grown for six-days in a growth room (16 h day/8 h night, 22 °C, 65 % relative humidity,  
569 photon fluence rate 100  $\mu\text{mol m}^{-2} \text{s}^{-1}$ ). Positive transformants were then transferred to  
570 herbicide-free 0.5 MS media-containing petri dishes. After one day recovery, GEFI  
571 expression was confirmed by visual inspection at a Zeiss Discovery.V20 fluorescence  
572 stereo microscope equipped with GFP, YFP and RFP filters and a Plan S 1.0x FWD 81  
573 mm lens. Approximately 40 herbicide resistant and fluorescing seedlings were then  
574 transferred to round 7 cm pots containing classic soil (Einheitserde) and grown until  
575 seed ripening in the growth room. ABAleon expressing plants were covered with a  
576 plastic lid and grown in a Conviron CMP6010 growth chamber (16 h day/8 h night, 20  
577 °C, 65 % relative humidity, photon fluence rate 150  $\mu\text{mol m}^{-2} \text{s}^{-1}$ ). To confirm proper  
578 GEFI expression, compare GEFI fluorescence emissions and avoid silencing effects in  
579 next generations, one leaf of each individual about three-week-old plant was examined  
580 at a confocal laser scanning microscope Leica SP5 II equipped with a HCX PL APO CS  
581 20.0 x 0.7 IMM UV objective (Leica Microsystems) using emission and excitation  
582 settings listed in Supplemental Data Set 1D. For each construct, at least two transgenic  
583 lines with highest GEFI expression, proper 3:1 segregation in the 2<sup>nd</sup> generation and  
584 least silencing were selected for further propagation. One line, indicated with  
585 (microscope) in Supplemental Data Set 1C, was used for microscopic experiments.

## 586 **Phenotypic characterization of GEFI lines**

587 Seeds were surface sterilized and sown on 0.5 MS media supplemented with 5  
588 mM MES-KOH pH 5.8 and 0.8 % phytoagar. Seven-day-old seedlings grown in the

589 growth room (16 h day/8 h night, 22 °C, 65 % relative humidity, photon fluence rate 100  
590  $\mu\text{mol m}^{-2} \text{s}^{-1}$ ) were transferred to soil in single pots and further grown until 28-days-old.  
591 Pictures from 9-12 plants per genotype were acquired from the top and rosette area  
592 values were obtained using the Rosette Tracker Fiji plugin (De Vylder et al., 2012).

### 593 **Microscopic analyses**

594 Seeds of GEFI expressing lines were surface sterilized and sown in four  
595 horizontal rows on square petri dishes containing LAK media (Barragán et al., 2012; 1  
596 mM  $\text{KH}_2\text{PO}_4$ , 2 mM  $\text{Ca}(\text{NO}_3)_2$ , 1 mM  $\text{MgSO}_4$ , 30  $\mu\text{M}$   $\text{H}_3\text{BO}_3$ , 10  $\mu\text{M}$   $\text{MnSO}_4$ , 1  $\mu\text{M}$   
597  $\text{ZnSO}_4$ , 1  $\mu\text{M}$   $\text{CuSO}_4$ , 0.03  $\mu\text{M}$   $(\text{NH}_4)_6\text{Mo}_7\text{O}_{24}$ , 50  $\mu\text{M}$   $\text{FeNaEDTA}$ ) supplemented with 10  
598 mM MES-Tris pH 5.6 and 0.8 % phytoagar. After six days of stratification in the dark at  
599 4 °C, seedlings were grown vertically in a Conviron CMP 6010 growth chamber (16 h  
600 day/8 h night, 22 °C, 65 % relative humidity, photon fluence rate 150  $\mu\text{mol m}^{-2} \text{s}^{-1}$ ). After  
601 four days, seedlings were transferred to microscope dishes (MatTek) containing 200  $\mu\text{L}$   
602 polymerized LAK media supplemented with 10 mM MES-Tris pH 5.6 and 0.7 % low  
603 melting point (LMP) agarose (Carl Roth). Seedlings were incubated vertically overnight  
604 in the growth chamber until the microscopic experiments were conducted.

605 Before microscopic analyses, seedlings on microscope dishes were placed  
606 horizontally and topped with 90  $\mu\text{L}$  imaging buffer (Allen et al., 2001; 5 mM KCl, 50  $\mu\text{M}$   
607  $\text{CaCl}_2$ , 10 mM MES-Tris pH 5.6). Using a 200  $\mu\text{L}$  pipet tip, seedlings were gently  
608 attached back to the LAK media-LMP agarose bed and incubated for 10-50 min for  
609 recovery until the GEFI fluorescence emission baseline was stable. Microscopic  
610 analyses were performed at Leica SP5 II and Leica SP8 confocal laser scanning  
611 microscopes using a 10x air objective and photomultiplier tube detectors (Leica  
612 Microsystems). Microscope settings were as follows: image format 1024x178 pixels  
613 (1536x256 pixels for RW300 experiment); bidirectional scanning at 400 Hz; zoom 0.75  
614 (SP8) or 1 (SP5 II and RW300 experiment at SP8); pinhole 5 AU; line accumulation 2  
615 (SP5 II) and 1 (SP8); line average 1 (SP5 II) and 2 (SP8); offset -0.4 % for blue, cyan,  
616 green and yellow emissions and -0.2 % for red emissions; frame rate 6 sec. Laser  
617 intensities and gain settings were optimized for each GEFI and kept stable for all  
618 experimental replicates. Emission and excitation settings for each GEFI are listed in

Rainer Waadt et al. – Coordination of signaling compound fluxes in roots

619 Supplemental Data Set 1D. After 4 min baseline recording, chemical treatments were  
620 performed by dropping 10  $\mu$ L of 10-fold concentrated stock solutions (Supplemental  
621 Data Set 1E) close to the imaged region.

622 Image processing and analyses were conducted using Fiji (Schindelin et al.,  
623 2012). Image processing included background subtraction (2-4), gaussian blur (1),  
624 median (1), 32-bit conversion, thresholding of background noise (2-5) and ratio image  
625 calculation for ratiometric GEFIs. Normalized fluorescence intensity ( $\Delta F/F_0$ ) and  
626 emission ratio ( $\Delta R/R_0$ ) analyses, and root tip localized time-dependent vertical response  
627 profiles were generated using a custom build Fiji plugin (will be uploaded to github after  
628 article acceptance) that utilizes additional plugins, such as VectorGraphics2D-0.13  
629 (<https://github.com/eseifert/vectorgraphics2d>) and xchart-3.5.2  
630 (<https://github.com/knowm/XChart>). Fluorescence emissions (F) and emission ratios (R)  
631 were measured as average values from each entire processed movie frame and signal  
632 changes ( $\Delta F/F_0$  and  $\Delta R/R_0$ ) were calculated relative to the average value of a 4 min  
633 baseline recording as  $[F(t)-F(\text{baseline})]/F(\text{baseline})$  and  $[R(t)-R(\text{baseline})]/R(\text{baseline})$ .  
634 Means and SD of experimental replicates were calculated using Excel (Microsoft). For  
635 time-dependent vertical response profiles, root tips were detected within each movie  
636 frame and regions of interest (ROIs) were drawn to cover the entire x-axis and a defined  
637 area above the root tip. Vertical response profiles were calculated from each movie  
638 frame ROI as average of all x-axis pixel values within each y-axis pixel line (similar to  
639 the Plot Profile command in Fiji) and plotted in a time-dependent manner. Time-  
640 dependent signal change vertical response profiles were calculated using the raw  
641 response profiles as a basis and applying the signal change formulas to each y-axis  
642 pixel line. Average time-dependent vertical response profiles of multiple experimental  
643 replicates were generated using the average Z projection command in Fiji.

## 644 **Statistical Analysis**

645 For phenotypic analyses presented in Supplemental Figure 5, Box plot- and  
646 statistical analyses using pairwise Tukey test comparisons relative to Col-0 wild type  
647 were conducted using OriginPro 2018 (OriginLab Corporation).

648 **Accession Numbers**

649 The Arabidopsis Genome Initiative locus numbers for the genes used in this  
650 article are as follows: *ABI1* (AT4G26080), *APA1* (AT1G11910), *AtPEP1* (AT5G64900),  
651 *HSP18.2* (AT5G59720), *LTI6b* (AT3G05890), *PYL1* (AT5G46790), *PYR1* (AT4G17870),  
652 *VTI11* (AT5G39510).

653 **Supplemental Data**

654 **Supplemental Figure 1.** Topologies of ABA indicators.

655 **Supplemental Figure 2.** Solvent control experiments of ABA indicators in  
656 Arabidopsis.

657 **Supplemental Figure 3.** Targeting of E<sup>2</sup>GFP to the plasma membrane.

658 **Supplemental Figure 4.** Targeting of E<sup>2</sup>GFP to the tonoplast.

659 **Supplemental Figure 5.** Targeting of E<sup>2</sup>GFP to the plasma membrane induces  
660 plant growth defects.

661 **Supplemental Figure 6.** Cytosolic  $E_{\text{GSH}}$  is only weakly affected by ATP and PEP1  
662 treatments.

663 **Supplemental Figure 7.** Glutamate-, ATP- and PEP1-dependent cytosolic  
664 oxidation is below the threshold of ROS-induced Ca<sup>2+</sup> signaling.

665 **Supplemental Figure 8.** Ca<sup>2+</sup>, H<sup>+</sup> and anion fluxes exhibit a high spatiotemporal  
666 overlap.

667 **Supplemental Data Set 1.** Lists of materials, imaging settings and chemicals used  
668 in this work.

669 **Supplemental Movie 1.** ABA indicator ABA responses in Arabidopsis.

670 **Supplemental Movie 2.** ABAleonSD1-3L21-P2A-R-GECO1 in response to ABA  
671 and IAA.

672 **Supplemental Movie 3.** PA-17-P2A-ABAlonSD1-3L21 in response to ABA and  
673 ATP.

674 **Supplemental Movie 4.** R-GECO1-GSL-E<sup>2</sup>GFP in response to IAA and ATP.

675 **Supplemental Movie 5.** R-GECO1-GSL-E<sup>2</sup>GFP in response to glutamate and ATP.

676 **Supplemental Movie 6.** PA-17-P2A-Grx1-roGFP2 in response to glutamate and  
677 H<sub>2</sub>O<sub>2</sub>.

678 **Supplemental Movie 7.** PA-17-P2A-roGFP2-Orp1 in response to glutamate and  
679 H<sub>2</sub>O<sub>2</sub>.

680 **Supplemental Movie 8.** R-GECO1-P2A-Grx1-roGFP2 in response to H<sub>2</sub>O<sub>2</sub>.

681 **Supplemental Movie 9.** R-GECO1-P2A-roGFP2-Orp1 in response to H<sub>2</sub>O<sub>2</sub>.

682 **Supplemental Movie 10.** R-GECO1 and roGFP2-Orp1 in response to ATP and  
683 H<sub>2</sub>O<sub>2</sub>.

684 **Supplemental Movie 11.** R-GECO1-P2A-roGFP2-Orp1 in response to PEP1 and  
685 H<sub>2</sub>O<sub>2</sub>.

686 **Supplemental Movie 12.** R-GECO1 and Grx1-roGFP2 in response to ATP and  
687 H<sub>2</sub>O<sub>2</sub>.

688 **Supplemental Movie 13.** R-GECO1-P2A-Grx1-roGFP2 in response to PEP1 and  
689 H<sub>2</sub>O<sub>2</sub>.

690 **Supplemental Movie 14.** R-GECO1-GSL-E<sup>2</sup>GFP in response to PEP1 and ATP.

691 **Supplemental Movie 15.** R-GECO1-P2A-Grx1-roGFP2 in response to GSSG.

692 **Supplemental Movie 16.** R-GECO1-GSL-E<sup>2</sup>GFP in response to GSSG.

693 **Supplemental Movie Legends**



694

## 695 **ACKNOWLEDGEMENTS**

696 We thank the groups at COS (Heidelberg) for generous access to equipment and  
697 GreenGate modules, Dr. Jana Hakenjos for initial help with ABAleon purifications, Dr.  
698 Andreas Meyer (University of Bonn) for roGFP2 PCR templates, Dr. Eugenia Russinova  
699 (VIB Gent) for providing the AtPEP1 peptide and Dr. Shintaro Munemasa (Okayama  
700 University) for helpful discussions. This work was supported by the Deutsche  
701 Forschungsgemeinschaft (DFG WA 3768/1-1) to R.W., (DFG AN 1323/1-1) to Z.A. and  
702 (DFG KU 931/14-1) to J.K..

703

## 704 **AUTHOR CONTRIBUTIONS**

705 R.W. conceived the project, generated most of the plasmids and transgenic plants,  
706 conducted the in vitro characterization of ABAleons, performed all microscopic analyses  
707 and wrote the manuscript. P.K. conducted the characterization of ABA indicators in  
708 HEK293T cells and revised the manuscript. Z.A. generated and characterized the  
709 transgenic lines RW307 and RW308 and revised the manuscript. C.W. developed the  
710 GEFI analyzer Fiji plugin and revised the manuscript. G.B. generated the plasmids  
711 indicated with GB and conducted preliminary ABA indicator characterizations. K.L.  
712 introduced A-17 and generated PA-17 GreenGate modules. J.K. supervised the ABA  
713 indicator characterization in HEK293T cells and revised the manuscript. K.S. supervised  
714 and hosted the project.

715

## 716 **REFERENCES**

717 **Allen, G.J., Chu, S.P., Harrington, C.L., Schumacher, K., Hoffmann, T., Tang, Y.Y.,**  
718 **Grill, E., and Schroeder, J.I.** (2001). A defined range of guard cell calcium  
719 oscillation parameters encodes stomatal movements. *Nature* **411**, 1053-1057.  
720 **Arosio, D., Ricci, F., Marchetti, L., Gualdani, R., Albertazzi, L., and Beltram, F.**



- 721 (2010). Simultaneous intracellular chloride and pH measurements using a GFP-  
722 based sensor. *Nat Methods* **7**, 516-518.
- 723 **Barragán, V., Leidi, E.O., Andrés, Z., Rubio, L., De Luca, A., Fernández, J.A.,**  
724 **Cubero, B., and Pardo, J.M.** (2012). Ion exchangers NHX1 and NHX2 mediate  
725 active potassium uptake into vacuoles to regulate cell turgor and stomatal function  
726 in *Arabidopsis*. *Plant Cell* **24**, 1127-1142.
- 727 **Behera, S., Zhaolong, X., Luoni, L., Bonza, M.C., Doccuola, F.G., De Michelis, M.I.,**  
728 **Morris, R.J., Schwarzländer, M., and Costa, A.** (2018). Cellular Ca<sup>2+</sup> Signals  
729 Generate Defined pH Signatures in Plants. *Plant Cell* **30**, 2704-2719.
- 730 **Bilan, D.S., and Belousov, V.V.** (2017). New tools for redox biology: From imaging to  
731 manipulation. *Free Radic Biol Med* **109**, 167-188.
- 732 **Bizzarri, R., Arcangeli, C., Arosio, D., Ricci, F., Faraci, P., Cardarelli, F., and**  
733 **Beltram, F.** (2006). Development of a novel GFP-based ratiometric excitation and  
734 emission pH indicator for intracellular studies. *Biophys J* **90**, 3300-3314.
- 735 **Bonza, M.C., and De Michelis, M.I.** (2011). The plant Ca<sup>2+</sup>-ATPase repertoire:  
736 biochemical features and physiological functions. *Plant Biol (Stuttg)* **13**, 421-430.
- 737 **Burén, S., Ortega-Villasante, C., Otvös, K., Samuelsson, G., Bakó, L., and Villarejo,**  
738 **A.** (2012). Use of the foot-and-mouth disease virus 2A peptide co-expression  
739 system to study intracellular protein trafficking in *Arabidopsis*. *PLoS One* **7**, e51973.
- 740 **Chen, D., Cao, Y., Li, H., Kim, D., Ahsan, N., Thelen, J., and Stacey, G.** (2017).  
741 Extracellular ATP elicits DORN1-mediated RBOHD phosphorylation to regulate  
742 stomatal aperture. *Nat Commun* **8**, 2265.
- 743 **Choi, J., Tanaka, K., Cao, Y., Qi, Y., Qiu, J., Liang, Y., Lee, S.Y., and Stacey, G.**  
744 (2014). Identification of a plant receptor for extracellular ATP. *Science* **343**, 290-  
745 294.
- 746 **Choi, W.G., Hilleary, R., Swanson, S.J., Kim, S.H., and Gilroy, S.** (2016). Rapid,  
747 Long-Distance Electrical and Calcium Signaling in Plants. *Annu Rev Plant Biol* **67**,  
748 287-307.
- 749 **Clough, S.J., and Bent, A.F.** (1998). Floral dip: a simplified method for *Agrobacterium*-  
750 mediated transformation of *Arabidopsis thaliana*. *Plant J* **16**, 735-743.
- 751 **Cutler, S.R., Rodriguez, P.L., Finkelstein, R.R., and Abrams, S.R.** (2010). Abscisic

- 752 acid: emergence of a core signaling network. *Annu Rev Plant Biol* **61**, 651-679.
- 753 **De Vylder, J., Vandenbussche, F., Hu, Y., Philips, W., and Van Der Straeten, D.**  
754 (2012). Rosette tracker: an open source image analysis tool for automatic  
755 quantification of genotype effects. *Plant Physiol* **160**, 1149-1159.
- 756 **Demidchik, V., Shabala, S.N., and Davies, J.M.** (2007). Spatial variation in H<sub>2</sub>O<sub>2</sub>  
757 response of *Arabidopsis thaliana* root epidermal Ca<sup>2+</sup> flux and plasma membrane  
758 Ca<sup>2+</sup> channels. *Plant J* **49**, 377-386.
- 759 **Demidchik, V., Shang, Z., Shin, R., Thompson, E., Rubio, L., Laohavisit, A.,**  
760 **Mortimer, J.C., Chivasa, S., Slabas, A.R., Glover, B.J., Schachtman, D.P.,**  
761 **Shabala, S.N., and Davies, J.M.** (2009). Plant extracellular ATP signalling by  
762 plasma membrane NADPH oxidase and Ca<sup>2+</sup> channels. *Plant J* **58**, 903-913.
- 763 **Dindas, J., Scherzer, S., Roelfsema, M.R.G., von Meyer, K., Müller, H.M., Al-**  
764 **Rasheid, K.A.S., Palme, K., Dietrich, P., Becker, D., Bennett, M.J., and Hedrich,**  
765 **R.** (2018). AUX1-mediated root hair auxin influx governs SCF<sup>TIR1/AFB</sup>-type Ca<sup>2+</sup>  
766 signaling. *Nat Commun* **9**, 1174.
- 767 **Dodd, A.N., Kudla, J., and Sanders, D.** (2010). The language of calcium signaling.  
768 *Annu Rev Plant Biol* **61**, 593-620.
- 769 **Edel, K.H., and Kudla, J.** (2016). Integration of calcium and ABA signaling. *Curr Opin*  
770 *Plant Biol* **33**, 83-91.
- 771 **Evans, M.J., Choi, W.G., Gilroy, S., and Morris, R.J.** (2016). A ROS-Assisted Calcium  
772 Wave Dependent on the AtRBOHD NADPH Oxidase and TPC1 Cation Channel  
773 Propagates the Systemic Response to Salt Stress. *Plant Physiol* **171**, 1771-1784.
- 774 **Fendrych, M., Leung, J., and Friml, J.** (2016). TIR1/AFB-Aux/IAA auxin perception  
775 mediates rapid cell wall acidification and growth of *Arabidopsis* hypocotyls. *Elife* **5**,  
776 e19048.
- 777 **Finkelstein, R.** (2013). Abscisic Acid synthesis and response. *Arabidopsis Book* **11**,  
778 e0166.
- 779 **Gao, Q.F., Gu, L.L., Wang, H.Q., Fei, C.F., Fang, X., Hussain, J., Sun, S.J., Dong,**  
780 **J.Y., Liu, H., and Wang, Y.F.** (2016). Cyclic nucleotide-gated channel 18 is an  
781 essential Ca<sup>2+</sup> channel in pollen tube tips for pollen tube guidance to ovules in  
782 *Arabidopsis*. *Proc Natl Acad Sci U S A* **113**, 3096-3101.

- 783 **Gilroy, S., Suzuki, N., Miller, G., Choi, W.G., Toyota, M., Devireddy, A.R., and**  
784 **Mittler, R.** (2014). A tidal wave of signals: calcium and ROS at the forefront of rapid  
785 systemic signaling. *Trends Plant Sci* **19**, 623-630.
- 786 **Gomez, L.D., Noctor, G., Knight, M.R., and Foyer, C.H.** (2004). Regulation of calcium  
787 signalling and gene expression by glutathione. *J Exp Bot* **55**, 1851-1859.
- 788 **Grossmann, G., Krebs, M., Maizel, A., Stahl, Y., Vermeer, J.E.M., and Ott, T.** (2018).  
789 Green light for quantitative live-cell imaging in plants. *J Cell Sci* **131**.
- 790 **Gutscher, M., Pauleau, A.L., Marty, L., Brach, T., Wabnitz, G.H., Samstag, Y.,**  
791 **Meyer, A.J., and Dick, T.P.** (2008). Real-time imaging of the intracellular  
792 glutathione redox potential. *Nat Methods* **5**, 553-559.
- 793 **Gutscher, M., Sobotta, M.C., Wabnitz, G.H., Ballikaya, S., Meyer, A.J., Samstag, Y.,**  
794 **and Dick, T.P.** (2009). Proximity-based protein thiol oxidation by H<sub>2</sub>O<sub>2</sub>-scavenging  
795 peroxidases. *J Biol Chem* **284**, 31532-31540.
- 796 **Han, J.P., Köster, P., Drerup, M.M., Scholz, M., Li, S., Edel, K.H., Hashimoto, K.,**  
797 **Kuchitsu, K., Hippler, M., and Kudla, J.** (2019). Fine tuning of RBOHF activity is  
798 achieved by differential phosphorylation and Ca<sup>2+</sup> binding. *New Phytol* **221**, 1935-  
799 1949.
- 800 **Haruta, M., Sabat, G., Stecker, K., Minkoff, B.B., and Sussman, M.R.** (2014). A  
801 peptide hormone and its receptor protein kinase regulate plant cell expansion.  
802 *Science* **343**, 408-411.
- 803 **Haruta, M., Gray, W.M., and Sussman, M.R.** (2015). Regulation of the plasma  
804 membrane proton pump (H(+)-ATPase) by phosphorylation. *Curr Opin Plant Biol* **28**,  
805 68-75.
- 806 **Hauser, F., Waadt, R., and Schroeder, J.I.** (2011). Evolution of abscisic acid synthesis  
807 and signaling mechanisms. *Curr Biol* **21**, R346-355.
- 808 **Hauser, F., Li, Z., Waadt, R., and Schroeder, J.I.** (2017). SnapShot: Abscisic Acid  
809 Signaling. *Cell* **171**, 1708-1708.e1700.
- 810 **Hedrich, R., Busch, H., and Raschke, K.** (1990). Ca<sup>2+</sup> and nucleotide dependent  
811 regulation of voltage dependent anion channels in the plasma membrane of guard  
812 cells. *EMBO J* **9**, 3889-3892.
- 813 **Hepler, P.K., and Winship, L.J.** (2010). Calcium at the cell wall-cytoplasm interface. *J*

- 814 Integr Plant Biol **52**, 147-160.
- 815 **Hilleary, R., Choi, W.G., Kim, S.H., Lim, S.D., and Gilroy, S.** (2018). Sense and  
816 sensibility: the use of fluorescent protein-based genetically encoded biosensors in  
817 plants. *Curr Opin Plant Biol* **46**, 32-38.
- 818 **Hochreiter, B., Garcia, A.P., and Schmid, J.A.** (2015). Fluorescent proteins as  
819 genetically encoded FRET biosensors in life sciences. *Sensors (Basel)* **15**, 26281-  
820 26314.
- 821 **Hruz, T., Laule, O., Szabo, G., Wessendorp, F., Bleuler, S., Oertle, L., Widmayer,  
822 P., Gruissem, W., and Zimmermann, P.** (2008). Genevestigator v3: a reference  
823 expression database for the meta-analysis of transcriptomes. *Adv Bioinformatics*  
824 **2008**, 420747.
- 825 **Inoue, S.I., Takahashi, K., Okumura-Noda, H., and Kinoshita, T.** (2016). Auxin Influx  
826 Carrier AUX1 Confers Acid Resistance for Arabidopsis Root Elongation Through the  
827 Regulation of Plasma Membrane H<sup>+</sup>-ATPase. *Plant Cell Physiol* **57**, 2194-2201.
- 828 **Jones, A.M., Danielson, J.A., Manojkumar, S.N., Lanquar, V., Grossmann, G., and  
829 Frommer, W.B.** (2014). Abscisic acid dynamics in roots detected with genetically  
830 encoded FRET sensors. *Elife* **3**, e01741.
- 831 **Kadota, Y., Sklenar, J., Derbyshire, P., Stransfeld, L., Asai, S., Ntoukakis, V.,  
832 Jones, J.D., Shirasu, K., Menke, F., Jones, A., and Zipfel, C.** (2014). Direct  
833 regulation of the NADPH oxidase RBOHD by the PRR-associated kinase BIK1  
834 during plant immunity. *Mol Cell* **54**, 43-55.
- 835 **Kadota, Y., Shirasu, K., and Zipfel, C.** (2015). Regulation of the NADPH Oxidase  
836 RBOHD During Plant Immunity. *Plant Cell Physiol* **56**, 1472-1480.
- 837 **Kärkönen, A., and Kuchitsu, K.** (2015). Reactive oxygen species in cell wall  
838 metabolism and development in plants. *Phytochemistry* **112**, 22-32.
- 839 **Keinath, N.F., Waadt, R., Brugman, R., Schroeder, J.I., Grossmann, G.,  
840 Schumacher, K., and Krebs, M.** (2015). Live Cell Imaging with R-GECO1 Sheds  
841 Light on flg22- and Chitin-Induced Transient [Ca(2+)]<sub>cyt</sub> Patterns in Arabidopsis. *Mol*  
842 *Plant* **8**, 1188-1200.
- 843 **Kelner, A., Leitão, N., Chabaud, M., Charpentier, M., and de Carvalho-Niebel, F.**  
844 (2018). Dual Color Sensors for Simultaneous Analysis of Calcium Signal Dynamics

- 845 in the Nuclear and Cytoplasmic Compartments of Plant Cells. *Front Plant Sci* **9**,  
846 245.
- 847 **Kim, J.H., Lee, S.R., Li, L.H., Park, H.J., Park, J.H., Lee, K.Y., Kim, M.K., Shin, B.A.,**  
848 **and Choi, S.Y.** (2011). High cleavage efficiency of a 2A peptide derived from  
849 porcine teschovirus-1 in human cell lines, zebrafish and mice. *PLoS One* **6**, e18556.
- 850 **Kimura, S., Waszczak, C., Hunter, K., and Wrzaczek, M.** (2017). Bound by Fate: The  
851 Role of Reactive Oxygen Species in Receptor-Like Kinase Signaling. *Plant Cell* **29**,  
852 638-654.
- 853 **Köhler, B., Hills, A., and Blatt, M.R.** (2003). Control of guard cell ion channels by  
854 hydrogen peroxide and abscisic acid indicates their action through alternate  
855 signaling pathways. *Plant Physiol* **131**, 385-388.
- 856 **Kostyuk, A.I., Panova, A.S., Bilan, D.S., and Belousov, V.V.** (2018). Redox  
857 biosensors in a context of multiparameter imaging. *Free Radic Biol Med* **128**, 23-39.
- 858 **Kudla, J., Batistic, O., and Hashimoto, K.** (2010). Calcium signals: the lead currency  
859 of plant information processing. *Plant Cell* **22**, 541-563.
- 860 **Kwak, J.M., Mori, I.C., Pei, Z.M., Leonhardt, N., Torres, M.A., Dangl, J.L., Bloom,**  
861 **R.E., Bodde, S., Jones, J.D., and Schroeder, J.I.** (2003). NADPH oxidase  
862 *AtrbohD* and *AtrbohF* genes function in ROS-dependent ABA signaling in  
863 *Arabidopsis*. *EMBO J* **22**, 2623-2633.
- 864 **Lampropoulos, A., Sutikovic, Z., Wenzl, C., Maegele, I., Lohmann, J.U., and**  
865 **Forner, J.** (2013). GreenGate---a novel, versatile, and efficient cloning system for  
866 plant transgenesis. *PLoS One* **8**, e83043.
- 867 **Li, L., Li, M., Yu, L., Zhou, Z., Liang, X., Liu, Z., Cai, G., Gao, L., Zhang, X., Wang,**  
868 **Y., Chen, S., and Zhou, J.M.** (2014). The FLS2-associated kinase BIK1 directly  
869 phosphorylates the NADPH oxidase RbohD to control plant immunity. *Cell Host*  
870 *Microbe* **15**, 329-338.
- 871 **Liu, Z., Wu, Y., Yang, F., Zhang, Y., Chen, S., Xie, Q., Tian, X., and Zhou, J.M.**  
872 (2013). BIK1 interacts with PEPRs to mediate ethylene-induced immunity. *Proc Natl*  
873 *Acad Sci U S A* **110**, 6205-6210.
- 874 **Loro, G., Drago, I., Pozzan, T., Schiavo, F.L., Zottini, M., and Costa, A.** (2012).  
875 Targeting of Cameleons to various subcellular compartments reveals a strict

- 876 cytoplasmic/mitochondrial Ca<sup>2+</sup> handling relationship in plant cells. *Plant J* **71**, 1-13.
- 877 **Ma, C., Guo, J., Kang, Y., Doman, K., Bryan, A.C., Tax, F.E., Yamaguchi, Y., and Qi,**  
878 **Z.** (2014). AtPEPTIDE RECEPTOR2 mediates the AtPEPTIDE1-induced cytosolic  
879 Ca(2+) rise, which is required for the suppression of Glutamine Dumper gene  
880 expression in Arabidopsis roots. *J Integr Plant Biol* **56**, 684-694.
- 881 **Mangano, S., Juárez, S.P., and Estevez, J.M.** (2016). ROS Regulation of Polar  
882 Growth in Plant Cells. *Plant Physiol* **171**, 1593-1605.
- 883 **Martynov, V.I., Pakhomov, A.A., Deyev, I.E., and Petrenko, A.G.** (2018). Genetically  
884 encoded fluorescent indicators for live cell pH imaging. *Biochim Biophys Acta Gen*  
885 *Subj* **1862**, 2924-2939.
- 886 **Michard, E., Simon, A.A., Tavares, B., Wudick, M.M., and Feijó, J.A.** (2017).  
887 Signaling with Ions: The Keystone for Apical Cell Growth and Morphogenesis in  
888 Pollen Tubes. *Plant Physiol* **173**, 91-111.
- 889 **Mishina, N.M., Bogeski, I., Bolotin, D.A., Hoth, M., Niemeyer, B.A., Schultz, C.,**  
890 **Zagaynova, E.V., Lukyanov, S., and Belousov, V.V.** (2012). Can we see PIP(3)  
891 and hydrogen peroxide with a single probe? *Antioxid Redox Signal* **17**, 505-512.
- 892 **Mittler, R.** (2017). ROS Are Good. *Trends Plant Sci* **22**, 11-19.
- 893 **Monshausen, G.B., Bibikova, T.N., Messerli, M.A., Shi, C., and Gilroy, S.** (2007).  
894 Oscillations in extracellular pH and reactive oxygen species modulate tip growth of  
895 Arabidopsis root hairs. *Proc Natl Acad Sci U S A* **104**, 20996-21001.
- 896 **Monshausen, G.B., Bibikova, T.N., Weisenseel, M.H., and Gilroy, S.** (2009). Ca<sup>2+</sup>  
897 regulates reactive oxygen species production and pH during mechanosensing in  
898 Arabidopsis roots. *Plant Cell* **21**, 2341-2356.
- 899 **Monshausen, G.B., Miller, N.D., Murphy, A.S., and Gilroy, S.** (2011). Dynamics of  
900 auxin-dependent Ca<sup>2+</sup> and pH signaling in root growth revealed by integrating high-  
901 resolution imaging with automated computer vision-based analysis. *Plant J* **65**, 309-  
902 318.
- 903 **Mori, I.C., Murata, Y., Yang, Y., Munemasa, S., Wang, Y.F., Andreoli, S., Tiriack, H.,**  
904 **Alonso, J.M., Harper, J.F., Ecker, J.R., Kwak, J.M., and Schroeder, J.I.** (2006).  
905 CDPKs CPK6 and CPK3 function in ABA regulation of guard cell S-type anion- and  
906 Ca(2+)-permeable channels and stomatal closure. *PLoS Biol* **4**, e327.



- 907 **Munemasa, S., Hauser, F., Park, J., Waadt, R., Brandt, B., and Schroeder, J.I.**  
908 (2015). Mechanisms of abscisic acid-mediated control of stomatal aperture. *Curr*  
909 *Opin Plant Biol* **28**, 154-162.
- 910 **Nagaya, S., Kawamura, K., Shinmyo, A., and Kato, K.** (2010). The HSP terminator of  
911 *Arabidopsis thaliana* increases gene expression in plant cells. *Plant Cell Physiol* **51**,  
912 328-332.
- 913 **Ngo, Q.A., Vogler, H., Lituiev, D.S., Nestorova, A., and Grossniklaus, U.** (2014). A  
914 calcium dialog mediated by the FERONIA signal transduction pathway controls  
915 plant sperm delivery. *Dev Cell* **29**, 491-500.
- 916 **Nietzel, T., Elsässer, M., Ruberti, C., Steinbeck, J., Ugalde, J.M., Fuchs, P.,**  
917 **Wagner, S., Ostermann, L., Moseler, A., Lemke, P., Fricker, M.D., Müller-**  
918 **Schüssele, S.J., Moerschbacher, B.M., Costa, A., Meyer, A.J., and**  
919 **Schwarzländer, M.** (2019). The fluorescent protein sensor roGFP2-Orp1 monitors  
920 *in vivo* H<sub>2</sub>O<sub>2</sub> and thiol redox integration and elucidates intracellular H<sub>2</sub>O<sub>2</sub> dynamics  
921 during elicitor-induced oxidative burst in *Arabidopsis*. *New Phytol* **221**, 1649-1664.
- 922 **Ogasawara, Y., Kaya, H., Hiraoka, G., Yumoto, F., Kimura, S., Kadota, Y.,**  
923 **Hishinuma, H., Senzaki, E., Yamagoe, S., Nagata, K., Nara, M., Suzuki, K.,**  
924 **Tanokura, M., and Kuchitsu, K.** (2008). Synergistic activation of the *Arabidopsis*  
925 NADPH oxidase AtrbohD by Ca<sup>2+</sup> and phosphorylation. *J Biol Chem* **283**, 8885-  
926 8892.
- 927 **Okumoto, S., Jones, A., and Frommer, W.B.** (2012). Quantitative imaging with  
928 fluorescent biosensors. *Annu Rev Plant Biol* **63**, 663-706.
- 929 **Peaucelle, A., Braybrook, S., and Höfte, H.** (2012). Cell wall mechanics and growth  
930 control in plants: the role of pectins revisited. *Front Plant Sci* **3**, 121.
- 931 **Pei, Z.M., Murata, Y., Benning, G., Thomine, S., Klüsener, B., Allen, G.J., Grill, E.,**  
932 **and Schroeder, J.I.** (2000). Calcium channels activated by hydrogen peroxide  
933 mediate abscisic acid signalling in guard cells. *Nature* **406**, 731-734.
- 934 **Pittman, J.K., and Hirschi, K.D.** (2016). CAX-ing a wide net: Cation/H(+) transporters  
935 in metal remediation and abiotic stress signalling. *Plant Biol (Stuttg)* **18**, 741-749.
- 936 **Schindelin, J., Arganda-Carreras, I., Frise, E., Kaynig, V., Longair, M., Pietzsch, T.,**  
937 **Preibisch, S., Rueden, C., Saalfeld, S., Schmid, B., Tinevez, J.Y., White, D.J.,**



- 938 **Hartenstein, V., Eliceiri, K., Tomancak, P., and Cardona, A.** (2012). Fiji: an open-  
939 source platform for biological-image analysis. *Nat Methods* **9**, 676-682.
- 940 **Schmidt, C., Schelle, I., Liao, Y.J., and Schroeder, J.I.** (1995). Strong regulation of  
941 slow anion channels and abscisic acid signaling in guard cells by phosphorylation  
942 and dephosphorylation events. *Proc Natl Acad Sci U S A* **92**, 9535-9539.
- 943 **Schumacher, K.** (2014). pH in the plant endomembrane system - an import and export  
944 business. *Curr Opin Plant Biol* **22**, 71-76.
- 945 **Schwarzländer, M., Logan, D.C., Johnston, I.G., Jones, N.S., Meyer, A.J., Fricker,  
946 M.D., and Sweetlove, L.J.** (2012). Pulsing of membrane potential in individual  
947 mitochondria: a stress-induced mechanism to regulate respiratory bioenergetics in  
948 *Arabidopsis*. *Plant Cell* **24**, 1188-1201.
- 949 **Seybold, H., Trempel, F., Ranf, S., Scheel, D., Romeis, T., and Lee, J.** (2014). Ca<sup>2+</sup>  
950 signalling in plant immune response: from pattern recognition receptors to Ca<sup>2+</sup>  
951 decoding mechanisms. *New Phytol* **204**, 782-790.
- 952 **Shan, X., Yan, J., and Xie, D.** (2012). Comparison of phytohormone signaling  
953 mechanisms. *Curr Opin Plant Biol* **15**, 84-91.
- 954 **Shavrukov, Y., and Hirai, Y.** (2016). Good and bad protons: genetic aspects of acidity  
955 stress responses in plants. *J Exp Bot* **67**, 15-30.
- 956 **Shen, Y., Rosendale, M., Campbell, R.E., and Perrais, D.** (2014). pHuji, a pH-  
957 sensitive red fluorescent protein for imaging of exo- and endocytosis. *J Cell Biol*  
958 **207**, 419-432.
- 959 **Shih, H.W., Miller, N.D., Dai, C., Spalding, E.P., and Monshausen, G.B.** (2014). The  
960 receptor-like kinase FERONIA is required for mechanical signal transduction in  
961 *Arabidopsis* seedlings. *Curr Biol* **24**, 1887-1892.
- 962 **Shih, H.W., DePew, C.L., Miller, N.D., and Monshausen, G.B.** (2015). The Cyclic  
963 Nucleotide-Gated Channel CNGC14 Regulates Root Gravitropism in *Arabidopsis*  
964 *thaliana*. *Curr Biol* **25**, 3119-3125.
- 965 **Smirnoff, N., and Arnaud, D.** (2019). Hydrogen peroxide metabolism and functions in  
966 plants. *New Phytol* **221**, 1197-1214.
- 967 **Song, C.J., Steinebrunner, I., Wang, X., Stout, S.C., and Roux, S.J.** (2006).  
968 Extracellular ATP induces the accumulation of superoxide via NADPH oxidases in

- 969 Arabidopsis. *Plant Physiol* **140**, 1222-1232.
- 970 **Stegmann, M., Monaghan, J., Smakowska-Luzan, E., Rovenich, H., Lehner, A.,**  
971 **Holton, N., Belkhadir, Y., and Zipfel, C.** (2017). The receptor kinase FER is a  
972 RALF-regulated scaffold controlling plant immune signaling. *Science* **355**, 287-289.
- 973 **Steinhorst, L., and Kudla, J.** (2014). Signaling in cells and organisms - calcium holds  
974 the line. *Curr Opin Plant Biol* **22**, 14-21.
- 975 **Sze, H., and Chanroj, S.** (2018). Plant Endomembrane Dynamics: Studies of K<sup>+</sup>/H<sup>+</sup>  
976 Antiporters Provide Insights on the Effects of pH and Ion Homeostasis. *Plant*  
977 *Physiol* **177**, 875-895.
- 978 **Takemoto, K., Ebine, K., Askani, J.C., Krüger, F., Gonzalez, Z.A., Ito, E., Goh, T.,**  
979 **Schumacher, K., Nakano, A., and Ueda, T.** (2018). Distinct sets of tethering  
980 complexes, SNARE complexes, and Rab GTPases mediate membrane fusion at  
981 the vacuole in Arabidopsis. *Proc Natl Acad Sci U S A* **115**, E2457-E2466.
- 982 **Tanaka, K., Swanson, S.J., Gilroy, S., and Stacey, G.** (2010). Extracellular  
983 nucleotides elicit cytosolic free calcium oscillations in Arabidopsis. *Plant Physiol*  
984 **154**, 705-719.
- 985 **Tian, L., Hires, S.A., Mao, T., Huber, D., Chiappe, M.E., Chalasani, S.H., Petreanu,**  
986 **L., Akerboom, J., McKinney, S.A., Schreiter, E.R., Bargmann, C.I., Jayaraman,**  
987 **V., Svoboda, K., and Looger, L.L.** (2009). Imaging neural activity in worms, flies  
988 and mice with improved GCaMP calcium indicators. *Nat Methods* **6**, 875-881.
- 989 **Tian, W., Hou, C., Ren, Z., Wang, C., Zhao, F., Dahlbeck, D., Hu, S., Zhang, L., Niu,**  
990 **Q., Li, L., Staskawicz, B.J., and Luan, S.** (2019). A calmodulin-gated calcium  
991 channel links pathogen patterns to plant immunity. *Nature* **572**, 131-135.
- 992 **Vanstraelen, M., and Benková, E.** (2012). Hormonal interactions in the regulation of  
993 plant development. *Annu Rev Cell Dev Biol* **28**, 463-487.
- 994 **Waadt, R., Hitomi, K., Nishimura, N., Hitomi, C., Adams, S.R., Getzoff, E.D., and**  
995 **Schroeder, J.I.** (2014). FRET-based reporters for the direct visualization of abscisic  
996 acid concentration changes and distribution in Arabidopsis. *Elife* **3**, e01739.
- 997 **Waadt, R., Hsu, P.K., and Schroeder, J.I.** (2015). Abscisic acid and other plant  
998 hormones: Methods to visualize distribution and signaling. *Bioessays* **37**, 1338-  
999 1349.

- 1000 **Waadt, R., Krebs, M., Kudla, J., and Schumacher, K.** (2017). Multiparameter imaging  
1001 of calcium and abscisic acid and high-resolution quantitative calcium measurements  
1002 using R-GECO1-mTurquoise in Arabidopsis. *New Phytol* **216**, 303-320.
- 1003 **Wagner, S., Steinbeck, J., Fuchs, P., Lichtenauer, S., Elsässer, M., Schippers,**  
1004 **J.H.M., Nietzel, T., Ruberti, C., Van Aken, O., Meyer, A.J., Van Dongen, J.T.,**  
1005 **Schmidt, R.R., and Schwarzländer, M.** (2019). Multiparametric real-time sensing  
1006 of cytosolic physiology links hypoxia responses to mitochondrial electron transport.  
1007 *New Phytol* **224**, 1668-1684.
- 1008 **Walia, A., Waadt, R., and Jones, A.M.** (2018). Genetically Encoded Biosensors in  
1009 Plants: Pathways to Discovery. *Annu Rev Plant Biol* **69**, 497-524.
- 1010 **Waszczak, C., Carmody, M., and Kangasjärvi, J.** (2018). Reactive Oxygen Species in  
1011 Plant Signaling. *Annu Rev Plant Biol* **69**, 209-236.
- 1012 **Yoshida, T., Christmann, A., Yamaguchi-Shinozaki, K., Grill, E., and Fernie, A.R.**  
1013 (2019). Revisiting the Basal Role of ABA - Roles Outside of Stress. *Trends Plant*  
1014 *Sci* **24**, 625-635.
- 1015 **Zhang, X., Köster, P., Schlücking, K., Balcerowicz, D., Hashimoto, K., Kuchitsu,**  
1016 **K., Vissenberg, K., and Kudla, J.** (2018). CBL1-CIPK26-mediated phosphorylation  
1017 enhances activity of the NADPH oxidase RBOHC, but is dispensable for root hair  
1018 growth. *FEBS Lett* **592**, 2582-2593.
- 1019 **Zhao, Y., Araki, S., Wu, J., Teramoto, T., Chang, Y.F., Nakano, M., Abdelfattah,**  
1020 **A.S., Fujiwara, M., Ishihara, T., Nagai, T., and Campbell, R.E.** (2011). An  
1021 expanded palette of genetically encoded Ca<sup>2+</sup> indicators. *Science* **333**, 1888-1891.
- 1022 **Zheng, X., Kang, S., Jing, Y., Ren, Z., Li, L., Zhou, J.M., Berkowitz, G., Shi, J., Fu,**  
1023 **A., Lan, W., Zhao, F., and Luan, S.** (2018). Danger-Associated Peptides Close  
1024 Stomata by OST1-Independent Activation of Anion Channels in Guard Cells. *Plant*  
1025 *Cell* **30**, 1132-1146.

1026

1027 **FIGURE LEGENDS**

1028 **Figure 1.** Development of ABAleonSD1-3L21. **(A)** FRET-pair and sensory domain, and  
1029 **(B)** linker screening of ABA indicator variants after expression in HEK293T cells. Shown  
1030 are emission ratio changes in response to 60 min treatments with 0 and 100  $\mu\text{M}$  ABA.  
1031 Reference indicators are shown in cyan and new candidates in red. Information on ABA  
1032 indicator topologies is given in Supplemental Figure 1. **(C to E)** Representative ABA-  
1033 dependent normalized in vitro emission spectra of ABAleons with indicated maximum  
1034 emission ratio change ( $\Delta R_{(\text{max})}/R_0$ ). **(F)** ABA-dependent in vitro emission ratios and  
1035 apparent ABA affinities ( $k'_d$ ) of ABAleons. **(G and H)** Comparison of ABA-dependent  
1036 ABAleon emission ratios: **(G)** in vitro and **(H)** in HEK293T cells. **(I)** In vitro and HEK293T  
1037 cell comparison of ABA-induced maximum emission ratio change. All data are shown as  
1038 mean  $\pm$  SD,  $n = 3$ .

1039 **Figure 2.** Comparison of ABA indicator ABA responses in Arabidopsis. Five-day-old  
1040 roots of Arabidopsis expressing **(A)** ABAleon2.15 ( $n = 9$ ), **(B)** ABAleonSD1-3L21 ( $n = 8$ )  
1041 and **(C)** ABACUS1-2 $\mu$  ( $n = 6$ ) were imaged for 64 min at a frame rate of  $10 \text{ min}^{-1}$  and  
1042 treated with  $10 \mu\text{M}$  ABA at  $t = 0 \text{ min}$ . Shown are average vertical response profiles of  
1043 (top) emission ratios ( $R$ ) and (middle) emission ratio changes ( $\Delta R/R_0$ ) normalized to 4  
1044 min average baseline recordings. An adjacent representative bright field (BF) root  
1045 image is shown for orientation. (bottom) Full image average emission ratio changes  
1046 (mean  $\pm$  SD) with indicated half response times ( $t_{1/2}$ ). A representative experiment is  
1047 provided as Supplemental Movie 1. Data of  $0 \mu\text{M}$  ABA control experiments are shown in  
1048 Supplemental Figure 2.

1049 **Figure 3.** Application of ABA does not trigger rapid changes of cytosolic  $\text{Ca}^{2+}$  or pH in  
1050 Arabidopsis roots. Analyses of five-day-old roots of Arabidopsis expressing **(A)**  
1051 ABAleonSD1-3L21-P2A-R-GECO1 (ABA and  $\text{Ca}^{2+}$ ;  $n = 5$ ) in response to  $10 \mu\text{M}$  ABA ( $t$   
1052 =  $0 \text{ min}$ ) and  $1 \mu\text{M}$  IAA ( $t = 30 \text{ min}$ ), and **(B)** PA-17-P2A-ABALEONSD1-3L21 (pH and  
1053 ABA;  $n = 8$ ) in response to  $10 \mu\text{M}$  ABA ( $t = 0 \text{ min}$ ) and  $1 \text{ mM}$  ATP ( $t = 30 \text{ min}$ ). Images  
1054 were acquired for 64 min at a frame rate of  $10 \text{ min}^{-1}$ . Shown are average vertical  
1055 response profiles of (top) emission ratios ( $R$ ) or fluorescence emissions ( $F$ ) and (middle)  
1056 signal changes ( $\Delta R/R_0$  or  $\Delta F/F_0$ ) normalized to 4 min average baseline recordings. An  
1057 adjacent representative bright field (BF) root image is shown for orientation. (bottom)

1058 Full image signal changes (mean  $\pm$  SD). Representative experiments are provided as  
1059 Supplemental Movies 2 and 3.

1060 **Figure 4.** Application of auxin and ATP triggers cytosolic  $\text{Ca}^{2+}$ ,  $\text{H}^+$  and  $\text{Cl}^-$  fluxes.  
1061 Analyses of five-day-old roots of Arabidopsis expressing R-GECO1-GSL-E<sup>2</sup>GFP ( $\text{Ca}^{2+}$ ,  
1062 pH and  $\text{Cl}^-$ ) in response to 1  $\mu\text{M}$  IAA (t = 0 min) and 1 mM ATP (t = 40 min; n = 6).  
1063 Images were acquired for 84 min at a frame rate of 10 min<sup>-1</sup>. **(A)** Average vertical  
1064 response profiles of (top) fluorescence emissions (F) or emission ratios (R), (middle)  
1065 signal changes ( $\Delta\text{F}/\text{F}_0$  or  $\Delta\text{R}/\text{R}_0$ ) normalized to 4 min average baseline recordings, and  
1066 (bottom) full image signal changes (mean  $\pm$  SD). **(B)** Spatiotemporal Pearson  
1067 correlation analyses (mean  $\pm$  SD) of indicated GEFI responses during the application of  
1068 IAA (t = -4-15 min). An adjacent representative bright field (BF) root image is shown for  
1069 orientation. A representative experiment is provided as Supplemental Movie 4.

1070 **Figure 5.** Application of glutamate triggers cytosolic  $\text{Ca}^{2+}$ ,  $\text{H}^+$  and  $\text{Cl}^-$  fluxes. Analyses of  
1071 five-day-old roots of Arabidopsis expressing R-GECO1-GSL-E<sup>2</sup>GFP ( $\text{Ca}^{2+}$ , pH and  $\text{Cl}^-$ )  
1072 in response to 1 mM glutamate (Glu; t = 0 min) and 1 mM ATP (t = 30 min; n = 7).  
1073 Images were acquired for 64 min at a frame rate of 10 min<sup>-1</sup>. **(A)** Average vertical  
1074 response profiles of (top) fluorescence emissions (F) or emission ratios (R), (middle)  
1075 signal changes ( $\Delta\text{F}/\text{F}_0$  or  $\Delta\text{R}/\text{R}_0$ ) normalized to 4 min average baseline recordings, and  
1076 (bottom) full image signal changes (mean  $\pm$  SD). **(B)** Spatiotemporal Pearson  
1077 correlation analyses (mean  $\pm$  SD) of indicated GEFI responses during the application of  
1078 glutamate (left; t = -4-10 min) or ATP (right; t = 26-60 min). An adjacent representative  
1079 bright field (BF) root image is shown for orientation. A representative experiment is  
1080 provided as Supplemental Movie 5. See also Supplemental Figures 3 and 4 for related  
1081 experiments.

1082 **Figure 6.** Application of Glutamate triggers a rapid cytosolic acidification without  
1083 noticeable impact on the cytosolic redox state. Analyses of five-day-old roots of  
1084 Arabidopsis expressing **(A)** PA-17-P2A-Grx1-roGFP2 (pH and  $E_{\text{GSH}}$ ; n = 6) and **(B)** PA-  
1085 17-P2A-roGFP2-Orp1 (pH and  $\text{H}_2\text{O}_2$ ; n = 8) in response to 1 mM glutamate (Glu; t = 0  
1086 min) and 100  $\mu\text{M}$   $\text{H}_2\text{O}_2$  (t = 30 min). Images were acquired for 64 min at a frame rate of

Rainer Waadt et al. – Coordination of signaling compound fluxes in roots

1087 10 min<sup>-1</sup>. Average vertical response profiles of (top) fluorescence emissions (F) or  
1088 emission ratios (R) and (middle) signal changes ( $\Delta F/F_0$  or  $\Delta R/R_0$ ) normalized to 4 min  
1089 average baseline recordings. An adjacent representative bright field (BF) root image is  
1090 shown for orientation. (bottom) Full image signal changes (mean  $\pm$  SD). Note that  
1091 experiments in **(A)** and **(B)** were acquired at different magnifications. Representative  
1092 experiments are provided as Supplemental Movies 6 and 7.

1093 **Figure 7.** Application of H<sub>2</sub>O<sub>2</sub> triggers overlapping but also distinct patterns of cytosolic  
1094 oxidation and Ca<sup>2+</sup> fluxes. Analyses of five-day-old roots of Arabidopsis expressing **(A)**  
1095 R-GECO1-P2A-Grx1-roGFP2 (Ca<sup>2+</sup> and E<sub>GSH</sub>; n = 8) and **(B)** R-GECO1-P2A-roGFP2-  
1096 Orp1 (Ca<sup>2+</sup> and H<sub>2</sub>O<sub>2</sub>; n = 8) in response to 20  $\mu$ M H<sub>2</sub>O<sub>2</sub> (t = 0 min) and 100  $\mu$ M H<sub>2</sub>O<sub>2</sub> (t  
1097 = 30 min). Images were acquired for 64 min at a frame rate of 10 min<sup>-1</sup>. Average vertical  
1098 response profiles of (top) fluorescence emissions (F) or emission ratios (R) and (middle)  
1099 signal changes ( $\Delta F/F_0$  or  $\Delta R/R_0$ ) normalized to 4 min average baseline recordings. An  
1100 adjacent representative bright field (BF) root image is shown for orientation. (bottom)  
1101 Full image signal changes (mean  $\pm$  SD). Representative experiments are provided as  
1102 Supplemental Movies 8 and 9.

1103 **Figure 8.** Cytosolic oxidation is only weakly affected by ATP and PEP1. Analyses of  
1104 five-day-old roots of Arabidopsis expressing **(A)** R-GECO1 and roGFP2-Orp1 (Ca<sup>2+</sup> and  
1105 H<sub>2</sub>O<sub>2</sub>; n = 7) in response to 1 mM ATP and 100  $\mu$ M H<sub>2</sub>O<sub>2</sub>, and **(B)** R-GECO1-P2A-  
1106 roGFP2-Orp1 (Ca<sup>2+</sup> and H<sub>2</sub>O<sub>2</sub>; n = 7) in response to 1  $\mu$ M PEP1 and 100  $\mu$ M H<sub>2</sub>O<sub>2</sub>.  
1107 Average vertical response profiles of (top) fluorescence emissions (F) or emission ratios  
1108 (R) and (middle) signal changes ( $\Delta F/F_0$  or  $\Delta R/R_0$ ) normalized to 4 min average baseline  
1109 recordings. An adjacent representative bright field (BF) root image is shown for  
1110 orientation. (bottom) Full image signal changes (mean  $\pm$  SD). Representative  
1111 experiments are provided as Supplemental Movies 10 and 11. See also Supplemental  
1112 Figures 6 and 7 for related experiments.

1113 **Figure 9.** Application of PEP1 triggers Ca<sup>2+</sup>, H<sup>+</sup> and Cl<sup>-</sup> fluxes with high spatiotemporal  
1114 overlap. **(A)** Analyses of five-day-old roots of Arabidopsis expressing R-GECO1-GSL-  
1115 E<sup>2</sup>GFP (Ca<sup>2+</sup>, pH and Cl<sup>-</sup>; n = 6) in response to 1  $\mu$ M PEP1 (t = 0 min) and 1 mM ATP (t



Rainer Waadt et al. – Coordination of signaling compound fluxes in roots

1116 = 30 min). Images were acquired for 64 min at a frame rate of 10 min<sup>-1</sup>. Average vertical  
1117 response profiles of (top) fluorescence emissions (F) or emission ratios (R) and (middle)  
1118 signal changes ( $\Delta F/F_0$  or  $\Delta R/R_0$ ) normalized to 4 min average baseline recordings. An  
1119 adjacent representative bright field (BF) root image is shown for orientation. (bottom)  
1120 Full image signal changes (mean  $\pm$  SD). **(B)** Spatiotemporal Pearson correlation  
1121 analyses (mean  $\pm$  SD) of indicated GEF1 responses during the application of PEP1 (t = -  
1122 4-20 min). A representative experiment is provided as Supplemental Movie 14.

1123 **Figure 10.** GSSG-triggered Ca<sup>2+</sup>-, H<sup>+</sup>- and Cl<sup>-</sup> influx precedes cytosolic oxidation.  
1124 Analyses of five-day-old roots of Arabidopsis expressing **(A)** R-GECO1-P2A-Grx1-  
1125 roGFP2 (Ca<sup>2+</sup> and  $E_{GSH}$ ; n = 5) and **(B)** R-GECO1-GSL-E<sup>2</sup>GFP (Ca<sup>2+</sup>, pH and Cl<sup>-</sup>; n = 6)  
1126 in response to 1 mM GSSG (t = 0 min). Images were acquired for 64 min at a frame rate  
1127 of 10 min<sup>-1</sup>. Average vertical response profiles of (top) fluorescence emissions (F) or  
1128 emission ratios (R) and (middle) signal changes ( $\Delta F/F_0$  or  $\Delta R/R_0$ ) normalized to 4 min  
1129 average baseline recordings. An adjacent representative bright field (BF) root image is  
1130 shown for orientation. (bottom) Full image signal changes (mean  $\pm$  SD). **(C)**  
1131 Spatiotemporal Pearson correlation analyses (mean  $\pm$  SD) of indicated GEF1 responses  
1132 during the application of GSSG (t = -4-20 min; data from **(B)**). Representative  
1133 experiments are provided as Supplemental Movies 15 and 16.

1134 **Figure 11.** Schematic model of observed ABA, Ca<sup>2+</sup>, H<sup>+</sup>, Cl<sup>-</sup> and redox changes in  
1135 roots. ABA treatment and uptake did not induce rapid fluxes of Ca<sup>2+</sup> or H<sup>+</sup>. Whereas,  
1136 IAA, glutamate (Glu), ATP, PEP1 and GSSG triggered Ca<sup>2+</sup>, H<sup>+</sup> and Cl<sup>-</sup> fluxes with high  
1137 spatiotemporal overlap. For comparison of the obtained data see also Supplemental  
1138 Figure 8. Compared to 20  $\mu$ M H<sub>2</sub>O<sub>2</sub> and 1 mM GSSG, redox changes in response to  
1139 glutamate, ATP and PEP1 were very low and below the threshold required to trigger  
1140 ROS-induced Ca<sup>2+</sup> signaling. Regions with highest response are color-coded according  
1141 to the adjacent flux curves that were taken from the corresponding main figures (ABA,  
1142 H<sub>2</sub>O<sub>2</sub> and  $E_{GSH}$ , black, Ca<sup>2+</sup>, magenta; H<sup>+</sup>, yellow; Cl<sup>-</sup>, cyan). For a better illustration of  
1143 H<sup>+</sup> and Cl<sup>-</sup> influx the PA-17 and E<sup>2</sup>GFP response curves were inverted. Arrows indicate  
1144 the direction of the corresponding fluxes. RC, root cap; MEZ, meristematic zone; EZ,  
1145 elongation zone; MZ, maturation zone.

Rainer Waadt et al. – Coordination of signaling compound fluxes in roots

1146

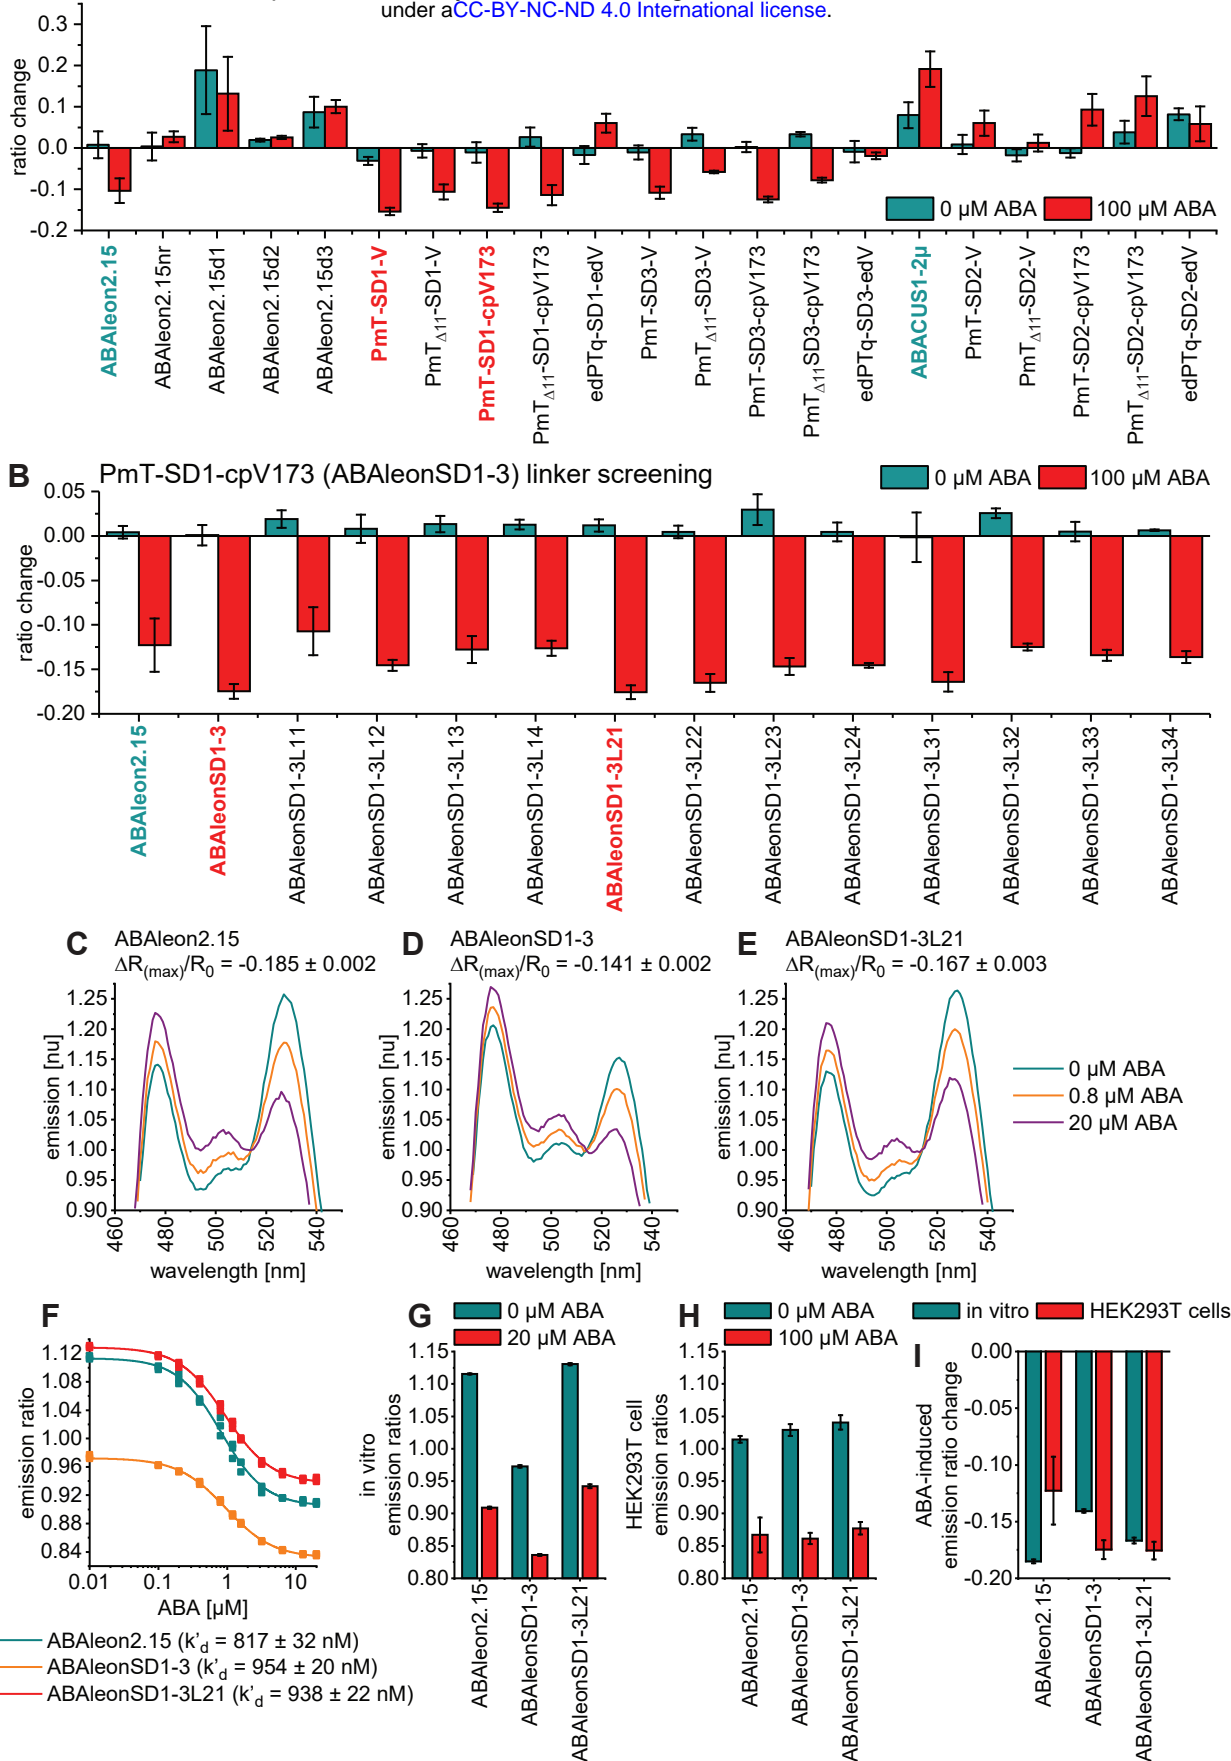

**Figure 1.** Development of ABAleonSD1-3L21. **(A)** FRET-pair and sensory domain, and **(B)** linker screening of ABA indicator variants after expression in HEK293T cells. Shown are emission ratio changes in response to 60 min treatments with 0 and 100  $\mu\text{M}$  ABA. Reference indicators are shown in cyan and new candidates in red. Information on ABA indicator topologies is given in Supplemental Figure 1. **(C to E)** Representative ABA-dependent normalized in vitro emission spectra of ABAleons with indicated maximum emission ratio change ( $\Delta R_{(max)}/R_0$ ). **(F)** ABA-dependent in vitro emission ratios and apparent ABA affinities ( $k'_d$ ) of ABAleons. **(G and H)** Comparison of ABA-dependent ABAleon emission ratios: **(G)** in vitro and **(H)** in HEK293T cells. **(I)** In vitro and HEK293T cell comparison of ABA-induced maximum emission ratio change. All data are shown as mean  $\pm$  SD,  $n = 3$ .

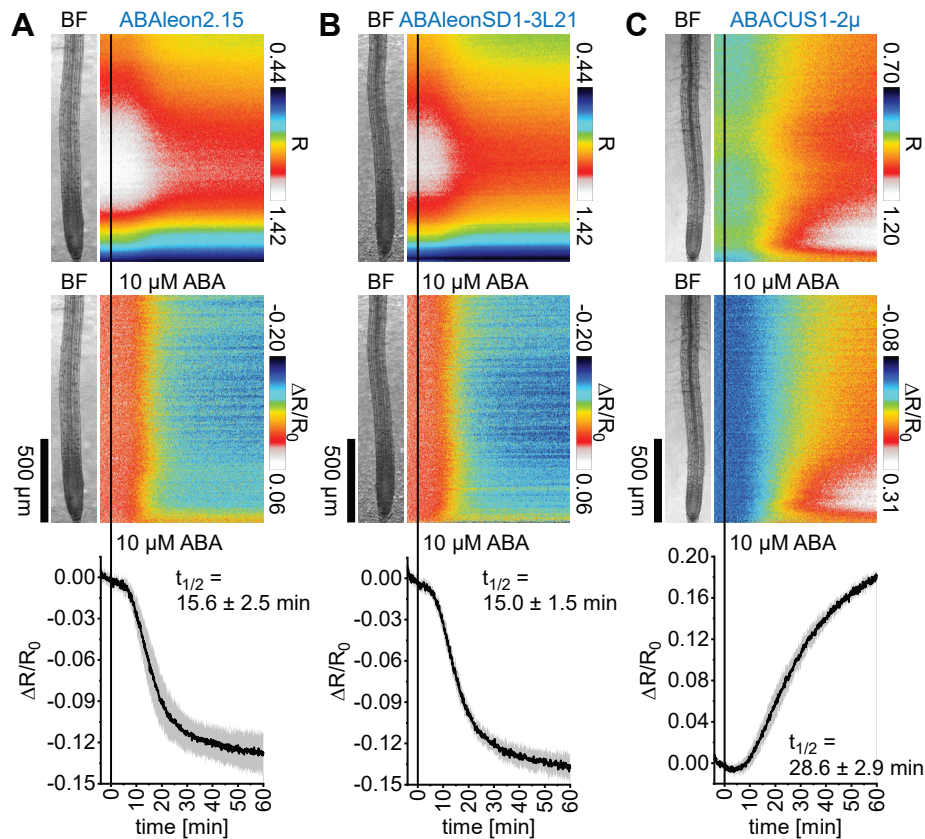

**Figure 2.** Comparison of ABA indicator ABA responses in Arabidopsis. Five-day-old roots of Arabidopsis expressing **(A)** ABAleon2.15 ( $n = 9$ ), **(B)** ABAleonSD1-3L21 ( $n = 8$ ) and **(C)** ABACUS1-2 $\mu$  ( $n = 6$ ) were imaged for 64 min at a frame rate of 10 min<sup>-1</sup> and treated with 10  $\mu$ M ABA at  $t = 0$  min. Shown are average vertical response profiles of (top) emission ratios ( $R$ ) and (middle) emission ratio changes ( $\Delta R/R_0$ ) normalized to 4 min average baseline recordings. An adjacent representative bright field (BF) root image is shown for orientation. (bottom) Full image average emission ratio changes (mean  $\pm$  SD) with indicated half response times ( $t_{1/2}$ ). A representative experiment is provided as Supplemental Movie 1. Data of 0  $\mu$ M ABA control experiments are shown in Supplemental Figure 2.

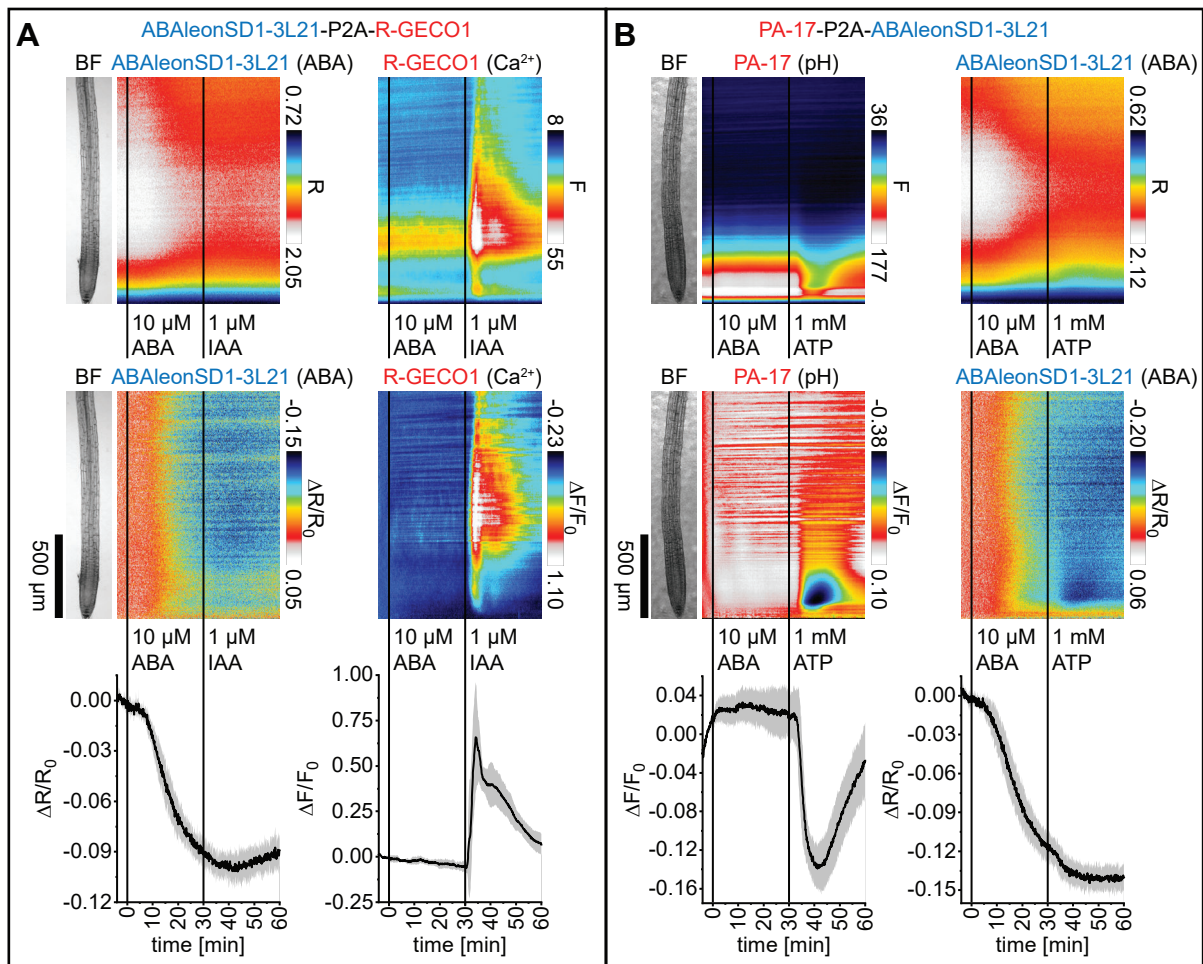

**Figure 3.** Application of ABA does not trigger rapid changes of cytosolic Ca<sup>2+</sup> or pH in Arabidopsis roots. Analyses of five-day-old roots of Arabidopsis expressing **(A)** ABAleonSD1-3L21-P2A-R-GECO1 (ABA and Ca<sup>2+</sup>; n = 5) in response to 10 μM ABA (t = 0 min) and 1 μM IAA (t = 30 min), and **(B)** PA-17-P2A-ABALEONSD1-3L21 (pH and ABA; n = 8) in response to 10 μM ABA (t = 0 min) and 1 mM ATP (t = 30 min). Images were acquired for 64 min at a frame rate of 10 min<sup>-1</sup>. Shown are average vertical response profiles of (top) emission ratios (R) or fluorescence emissions (F) and (middle) signal changes (ΔR/R<sub>0</sub> or ΔF/F<sub>0</sub>) normalized to 4 min average baseline recordings. An adjacent representative bright field (BF) root image is shown for orientation. (bottom) Full image signal changes (mean ± SD). Representative experiments are provided as Supplemental Movies 2 and 3.



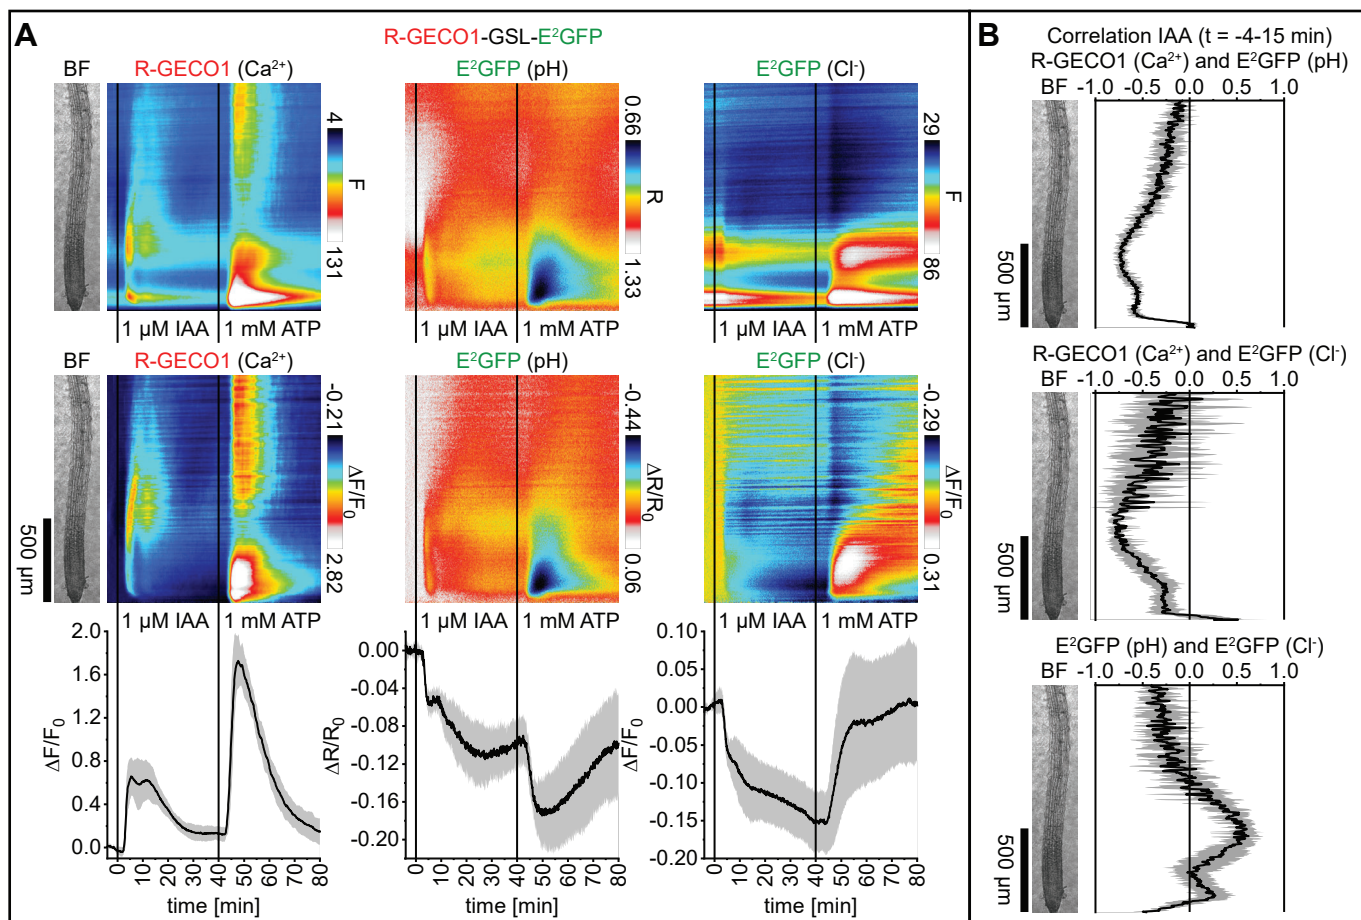

**Figure 4.** Application of auxin and ATP triggers cytosolic Ca<sup>2+</sup>, H<sup>+</sup> and Cl<sup>-</sup> fluxes. Analyses of five-day-old roots of *Arabidopsis* expressing R-GECO1-GSL-E<sup>2</sup>GFP (Ca<sup>2+</sup>, pH and Cl<sup>-</sup>) in response to 1 μM IAA (t = 0 min) and 1 mM ATP (t = 40 min; n = 6). Images were acquired for 84 min at a frame rate of 10 min<sup>-1</sup>. **(A)** Average vertical response profiles of (top) fluorescence emissions (F) or emission ratios (R), (middle) signal changes (ΔF/F<sub>0</sub> or ΔR/R<sub>0</sub>) normalized to 4 min average baseline recordings, and (bottom) full image signal changes (mean ± SD). **(B)** Spatiotemporal Pearson correlation analyses (mean ± SD) of indicated GEFI responses during the application of IAA (t = -4-15 min). An adjacent representative bright field (BF) root image is shown for orientation. A representative experiment is provided as Supplemental Movie 4.



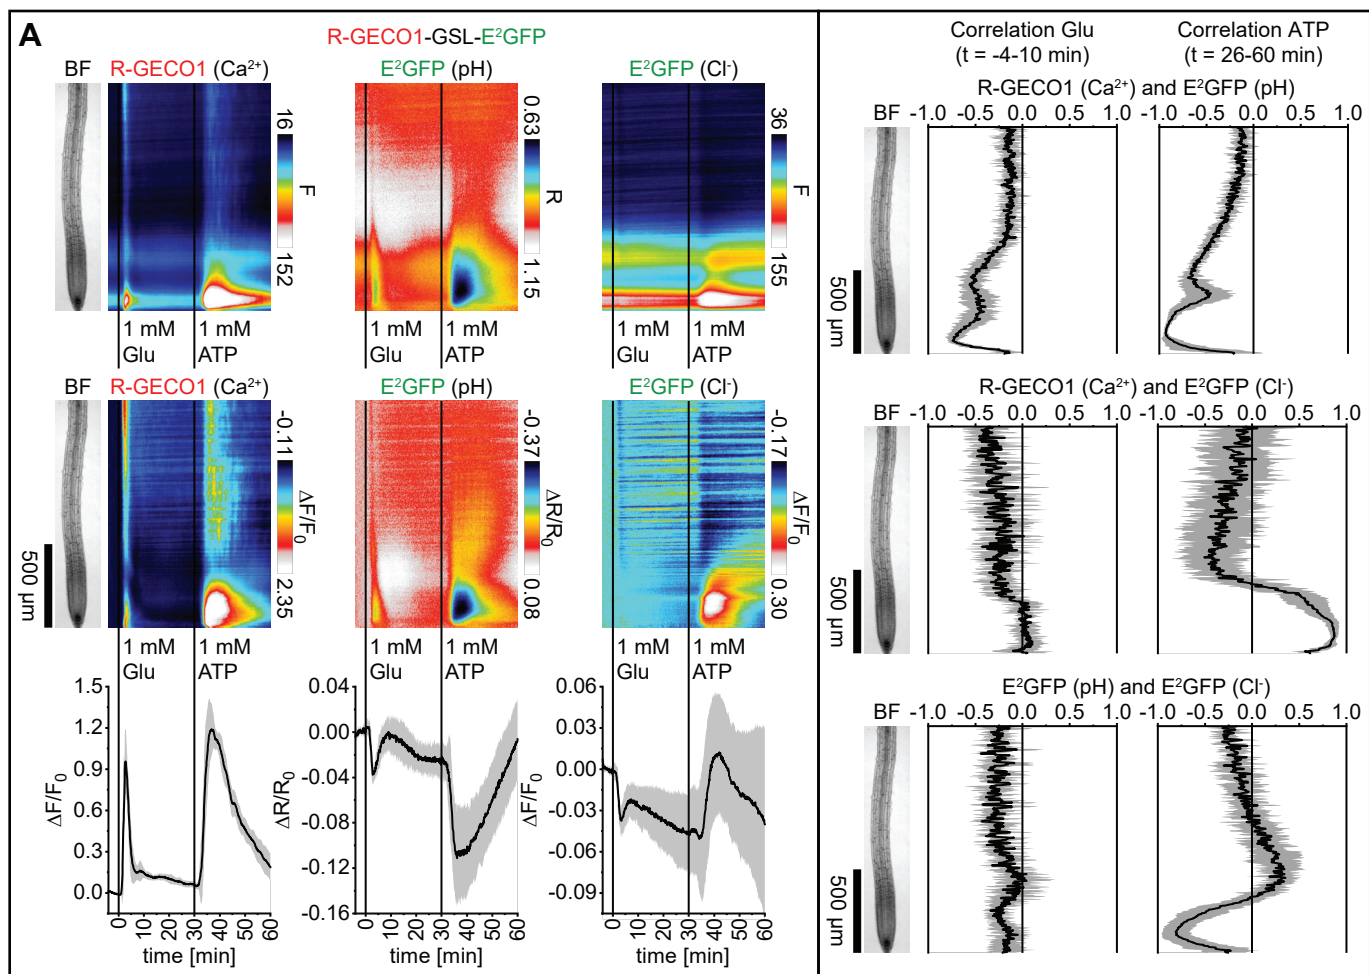

**Figure 5.** Application of glutamate triggers cytosolic Ca<sup>2+</sup>, H<sup>+</sup> and Cl<sup>-</sup> fluxes. Analyses of five-day-old roots of Arabidopsis expressing R-GECO1-GSL-E<sup>2</sup>GFP (Ca<sup>2+</sup>, pH and Cl<sup>-</sup>) in response to 1 mM glutamate (Glu; t = 0 min) and 1 mM ATP (t = 30 min; n = 7). Images were acquired for 64 min at a frame rate of 10 min<sup>-1</sup>. **(A)** Average vertical response profiles of (top) fluorescence emissions (F) or emission ratios (R), (middle) signal changes ( $\Delta F/F_0$  or  $\Delta R/R_0$ ) normalized to 4 min average baseline recordings, and (bottom) full image signal changes (mean  $\pm$  SD). **(B)** Spatiotemporal Pearson correlation analyses (mean  $\pm$  SD) of indicated GEFI responses during the application of glutamate (left; t = -4-10 min) or ATP (right; t = 26-60 min). An adjacent representative bright field (BF) root image is shown for orientation. A representative experiment is provided as Supplemental Movie 5. See also Supplemental Figures 3 and 4 for related experiments.

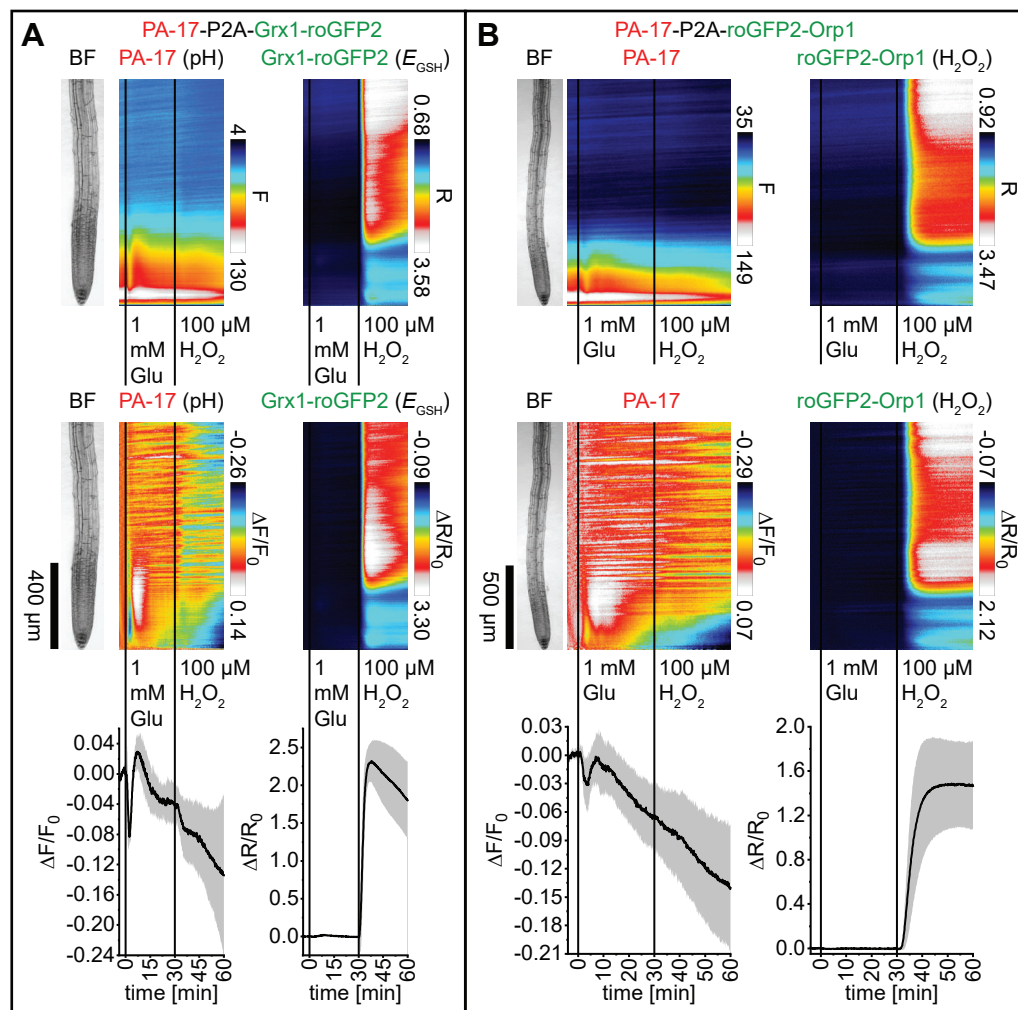

**Figure 6.** Application of Glutamate triggers a rapid cytosolic acidification without noticeable impact on the cytosolic redox state. Analyses of five-day-old roots of *Arabidopsis* expressing (A) PA-17-P2A-Grx1-roGFP2 (pH and  $E_{\text{GSH}}$ ;  $n = 6$ ) and (B) PA-17-P2A-roGFP2-Orp1 (pH and  $\text{H}_2\text{O}_2$ ;  $n = 8$ ) in response to 1 mM glutamate (Glu;  $t = 0$  min) and 100  $\mu\text{M}$   $\text{H}_2\text{O}_2$  ( $t = 30$  min). Images were acquired for 64 min at a frame rate of 10  $\text{min}^{-1}$ . Average vertical response profiles of (top) fluorescence emissions (F) or emission ratios (R) and (middle) signal changes ( $\Delta F/F_0$  or  $\Delta R/R_0$ ) normalized to 4 min average baseline recordings. An adjacent representative bright field (BF) root image is shown for orientation. (bottom) Full image signal changes (mean  $\pm$  SD). Note that experiments in (A) and (B) were acquired at different magnifications. Representative experiments are provided as Supplemental Movies 6 and 7.

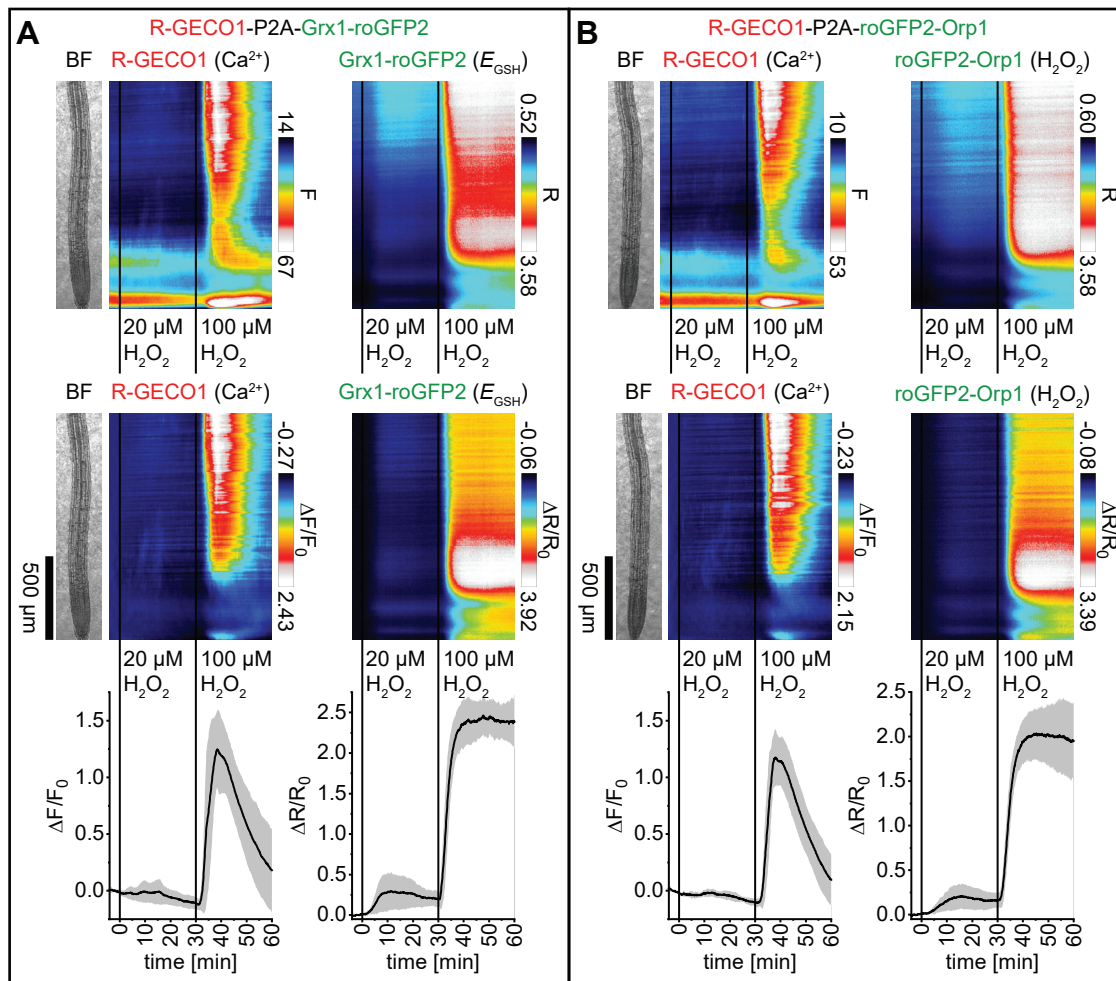

**Figure 7.** Application of  $\text{H}_2\text{O}_2$  triggers overlapping but also distinct patterns of cytosolic oxidation and  $\text{Ca}^{2+}$  fluxes. Analyses of five-day-old roots of *Arabidopsis* expressing (A) R-GECO1-P2A-Grx1-roGFP2 ( $\text{Ca}^{2+}$  and  $E_{\text{GSH}}$ ;  $n = 8$ ) and (B) R-GECO1-P2A-roGFP2-Orp1 ( $\text{Ca}^{2+}$  and  $\text{H}_2\text{O}_2$ ;  $n = 8$ ) in response to 20  $\mu\text{M}$   $\text{H}_2\text{O}_2$  ( $t = 0$  min) and 100  $\mu\text{M}$   $\text{H}_2\text{O}_2$  ( $t = 30$  min). Images were acquired for 64 min at a frame rate of 10  $\text{min}^{-1}$ . Average vertical response profiles of (top) fluorescence emissions (F) or emission ratios (R) and (middle) signal changes ( $\Delta F/F_0$  or  $\Delta R/R_0$ ) normalized to 4 min average baseline recordings. An adjacent representative bright field (BF) root image is shown for orientation. (bottom) Full image signal changes (mean  $\pm$  SD). Representative experiments are provided as Supplemental Movies 8 and 9.

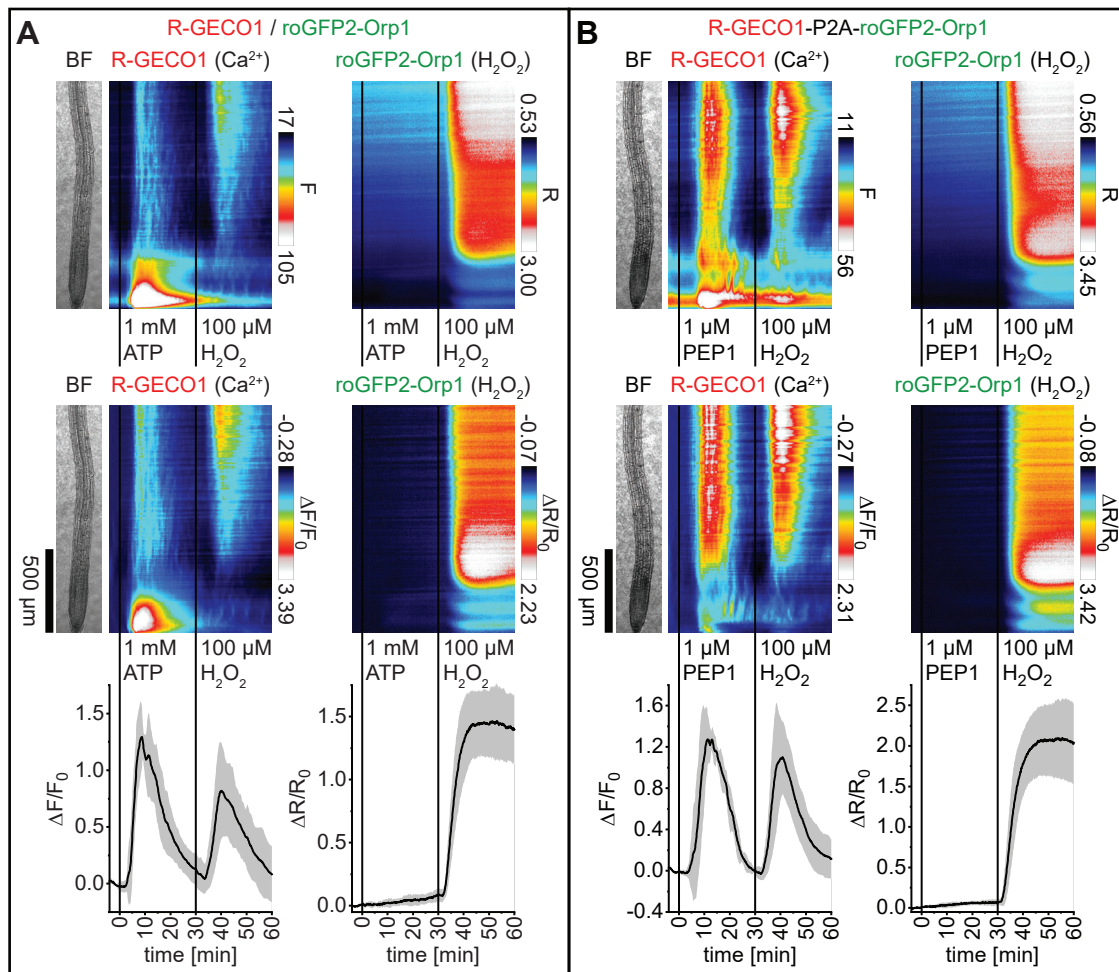

**Figure 8.** Cytosolic oxidation is only weakly affected by ATP and PEP1. Analyses of five-day-old roots of *Arabidopsis* expressing (A) R-GECO1 and roGFP2-Orp1 (Ca<sup>2+</sup> and H<sub>2</sub>O<sub>2</sub>; n = 7) in response to 1 mM ATP and 100 μM H<sub>2</sub>O<sub>2</sub> and (B) R-GECO1-P2A-roGFP2-Orp1 (Ca<sup>2+</sup> and H<sub>2</sub>O<sub>2</sub>; n = 7) in response to 1 μM PEP1 and 100 μM H<sub>2</sub>O<sub>2</sub>. Average vertical response profiles of (top) fluorescence emissions (F) or emission ratios (R) and (middle) signal changes (ΔF/F<sub>0</sub> or ΔR/R<sub>0</sub>) normalized to 4 min average baseline recordings. An adjacent representative bright field (BF) root image is shown for orientation. (bottom) Full image signal changes (mean ± SD). Representative experiments are provided as Supplemental Movies 10 and 11. See also Supplemental Figures 6 and 7 for related experiments.



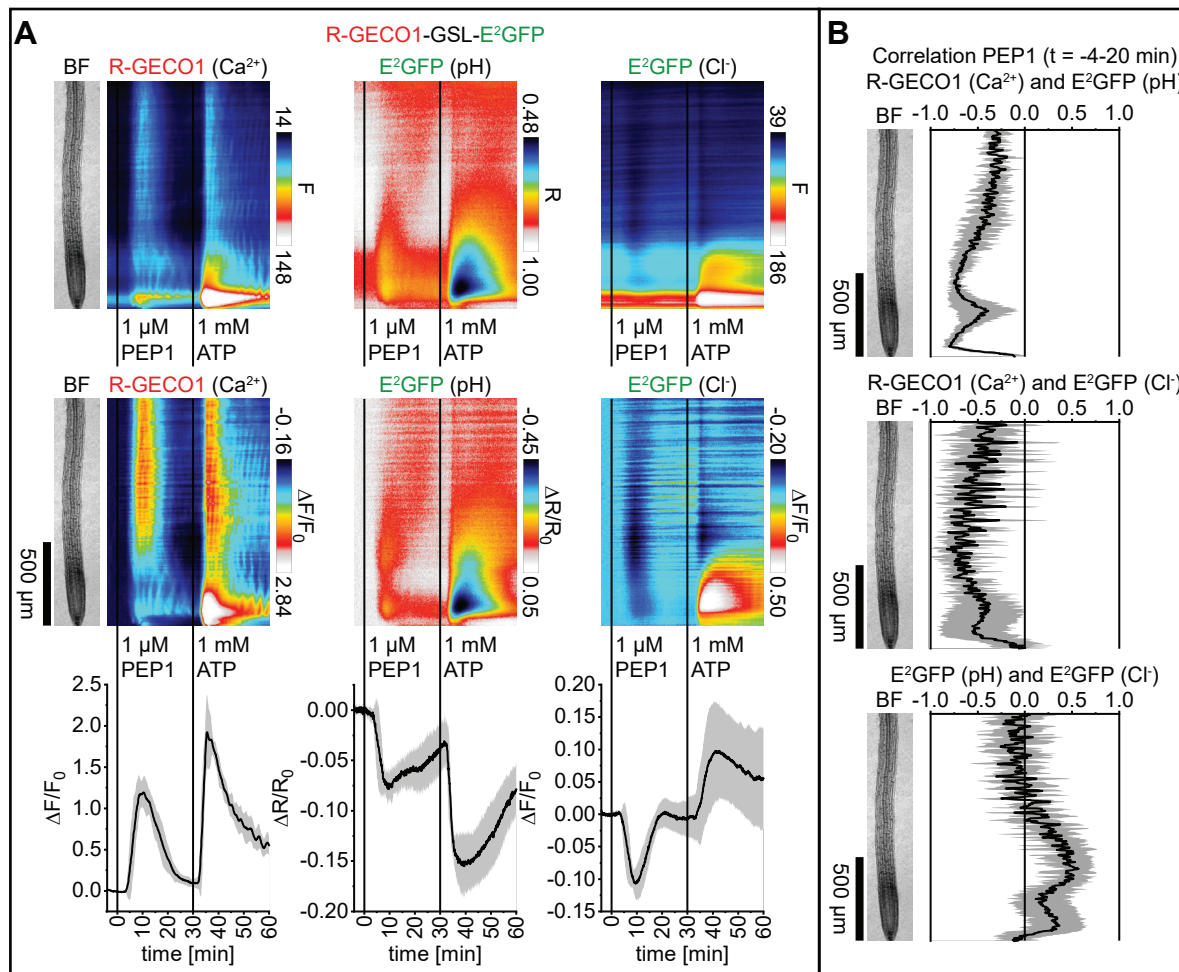

**Figure 9.** Application of PEP1 triggers Ca<sup>2+</sup>, H<sup>+</sup> and Cl<sup>-</sup> fluxes with high spatiotemporal overlap. **(A)** Analyses of five-day-old roots of Arabidopsis expressing R-GECO1-GSL-E<sup>2</sup>GFP (Ca<sup>2+</sup>, pH and Cl<sup>-</sup>; n = 6) in response to 1 μM PEP1 (t = 0 min) and 1 mM ATP (t = 30 min). Images were acquired for 64 min at a frame rate of 10 min<sup>-1</sup>. Average vertical response profiles of (top) fluorescence emissions (F) or emission ratios (R) and (middle) signal changes (ΔF/F<sub>0</sub> or ΔR/R<sub>0</sub>) normalized to 4 min average baseline recordings. An adjacent representative bright field (BF) root image is shown for orientation. (bottom) Full image signal changes (mean ± SD). **(B)** Spatiotemporal Pearson correlation analyses (mean ± SD) of indicated GEFI responses during the application of PEP1 (t = -4-20 min). A representative experiments is provided as Supplemental Movie 14.

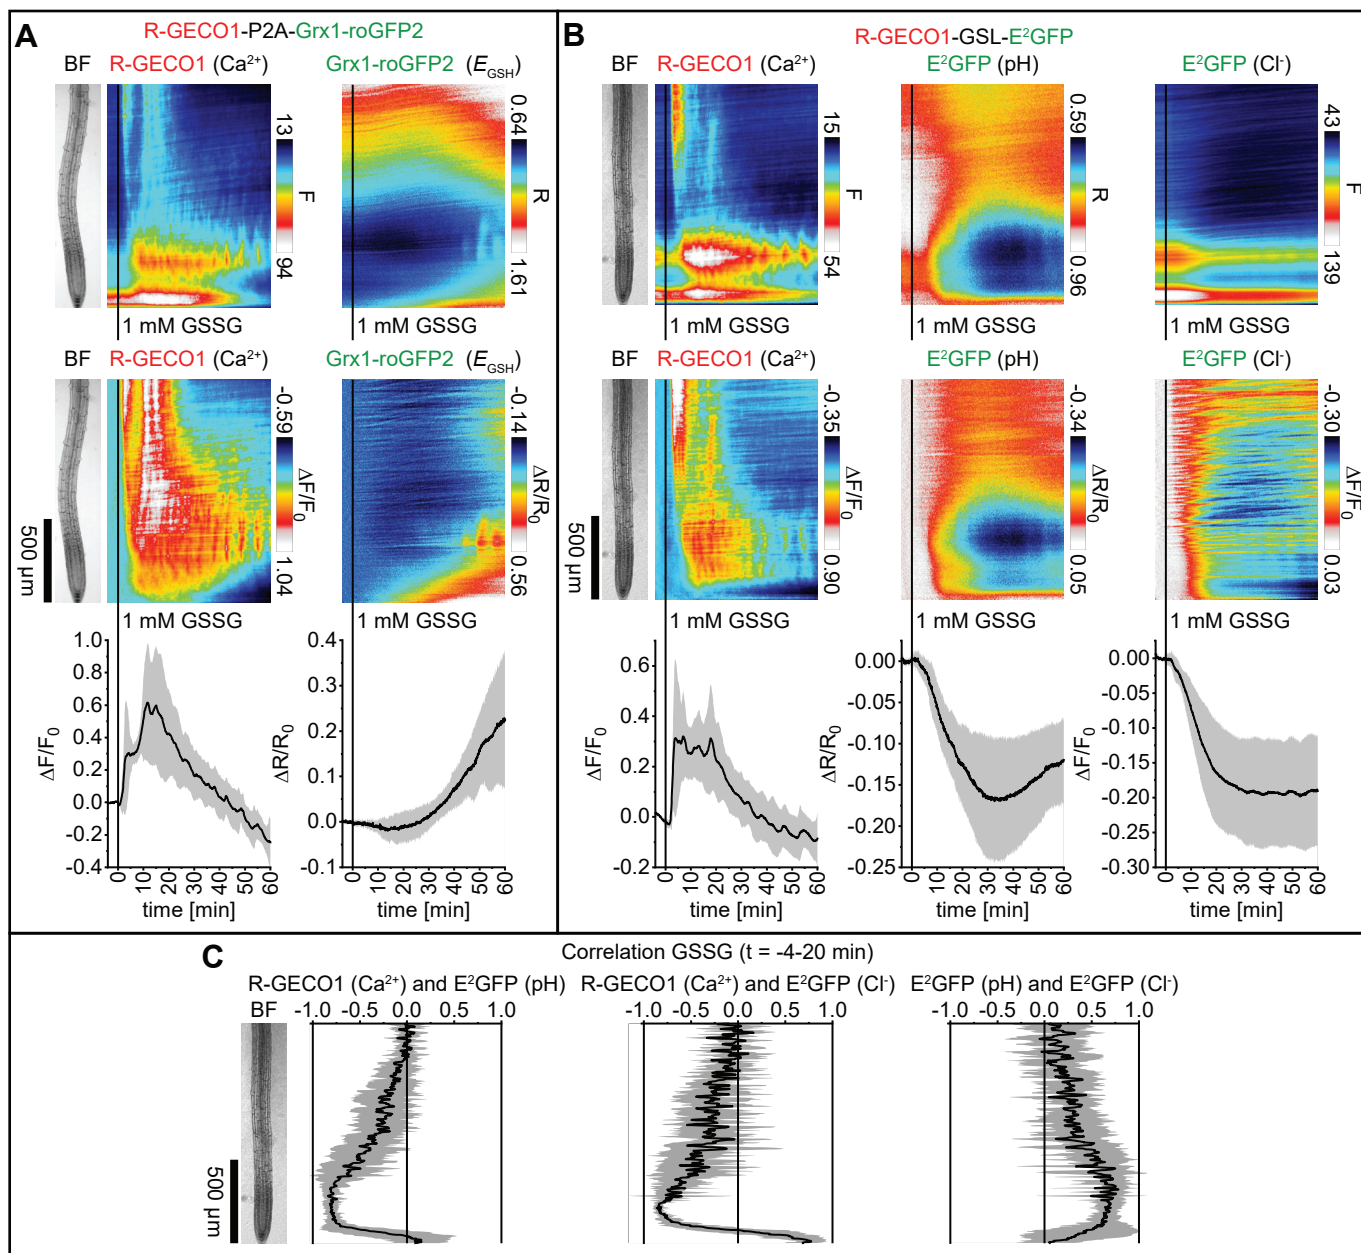

**Figure 10.** GSSG-triggered Ca<sup>2+</sup>-, H<sup>+</sup>- and Cl<sup>-</sup> influx precedes cytosolic oxidation. Analyses of five-day-old roots of *Arabidopsis* expressing **(A)** R-GECO1-P2A-Grx1-roGFP2 (Ca<sup>2+</sup> and  $E_{\text{GSH}}$ ; n = 5) and **(B)** R-GECO1-GSL-E<sup>2</sup>GFP (Ca<sup>2+</sup>, pH and Cl<sup>-</sup>; n = 6) in response to 1 mM GSSG (t = 0 min). Images were acquired for 64 min at a frame rate of 10 min<sup>-1</sup>. Average vertical response profiles of (top) fluorescence emissions (F) or emission ratios (R) and (middle) signal changes ( $\Delta F/F_0$  or  $\Delta R/R_0$ ) normalized to 4 min average baseline recordings. An adjacent representative bright field (BF) root image is shown for orientation. (bottom) Full image signal changes (mean  $\pm$  SD). **(C)** Spatiotemporal Pearson correlation analyses (mean  $\pm$  SD) of indicated GEFI responses during the application of GSSG (t = -4-20 min; data from **(B)**). Representative experiments are provided as Supplemental Movies 15 and 16.



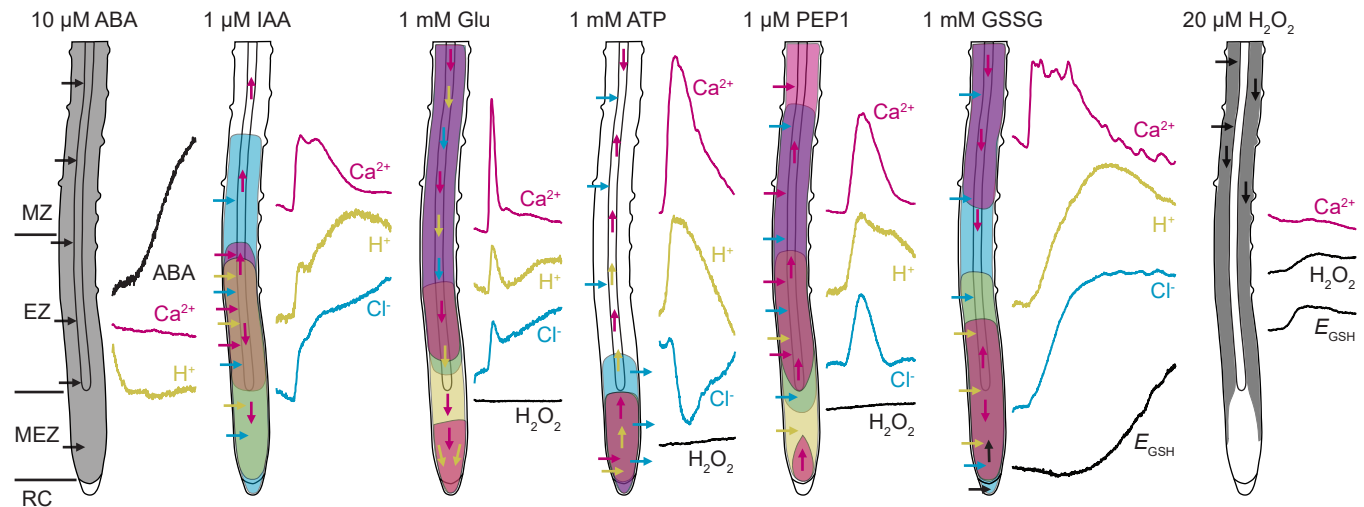

**Figure 11.** Schematic model of observed ABA,  $\text{Ca}^{2+}$ ,  $\text{H}^+$ ,  $\text{Cl}^-$  and redox changes in roots. ABA treatment and uptake did not induce rapid fluxes of  $\text{Ca}^{2+}$  or  $\text{H}^+$ . Whereas, IAA, glutamate (Glu), ATP, PEP1 and GSSG triggered  $\text{Ca}^{2+}$ ,  $\text{H}^+$  and  $\text{Cl}^-$  fluxes with high spatiotemporal overlap. For comparison of the obtained data see also Supplemental Figure 8. Compared to  $20 \mu\text{M H}_2\text{O}_2$  and  $1 \text{ mM GSSG}$ , redox changes in response to glutamate, ATP and PEP1 were very low and below the threshold required to trigger ROS-induced  $\text{Ca}^{2+}$  signaling. Regions with highest response are color-coded according to the adjacent flux curves that were taken from the corresponding main figures (ABA,  $\text{H}_2\text{O}_2$  and  $E_{\text{GSH}}$ , black;  $\text{Ca}^{2+}$ , magenta;  $\text{H}^+$ , yellow;  $\text{Cl}^-$ , cyan). For a better illustration of  $\text{H}^+$  and  $\text{Cl}^-$  influx the PA-17 and  $E^2\text{GFP}$  response curves were inverted. Arrows indicate the direction of the corresponding fluxes. RC, root cap; MEZ, meristematic zone; EZ, elongation zone; MZ, maturation zone.

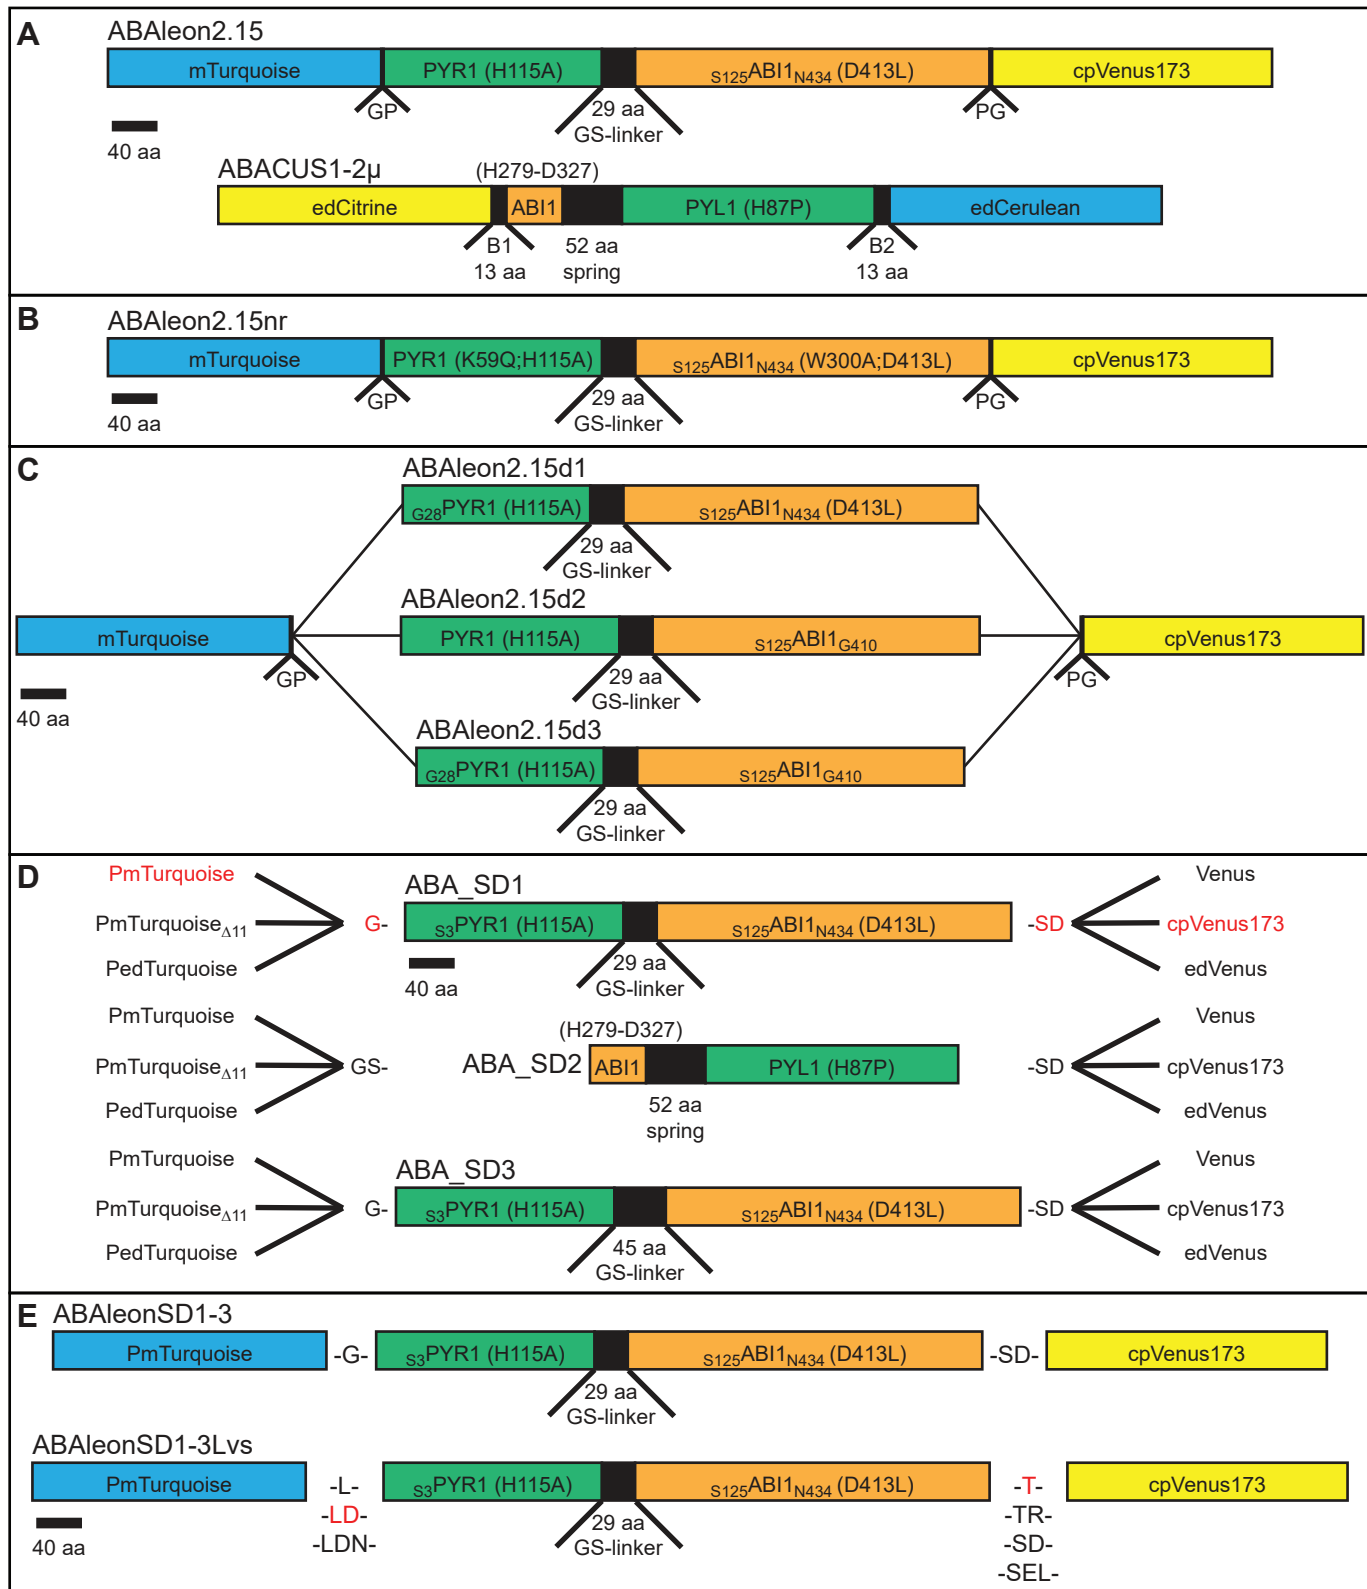

**Supplemental Figure 1.** Topologies of ABA indicators. Indicated are fluorescent protein FRET-pairs (cyan and yellow), linkers (black), PYR1 and PYL1 moieties (green) and ABI1 moieties (orange). Point mutations and incorporated amino acids are given. **(A)** ABAleon2.15 and ABACUS1-2μ. **(B)** Non-responsive ABAleon2.15nr that contains two mutations PYR1<sub>K59Q</sub> and ABI1<sub>W300A</sub> to prevent ABA-binding. **(C)** ABAleon2.15 deletion variants. **(D)** FRET-pair and sensory domain (SD) variants. Arabidopsis codon-optimized (P)mTurquoise, PmTurquoise<sub>Δ11</sub> with a C-terminal deletion of 11 amino acids or enhanced dimeric PedTurquoise were used as FRET donor. Venus, circularly permuted Venus (cpVenus173) or enhanced dimeric (ed)Venus were used as FRET acceptor. The sensory domains SD1 and SD3 derived from ABAleon2.15, with SD3 harboring a longer linker between the PYR1 and ABI1 moieties. SD2 derived from ABACUS1-2μ. **(E)** ABAleonSD1-3 linker variants. **(D and E)** Red color indicates the topology of ABAleonSD1-3 **(D)** and the linkers in ABAleonSD1-3L21 **(E)**.

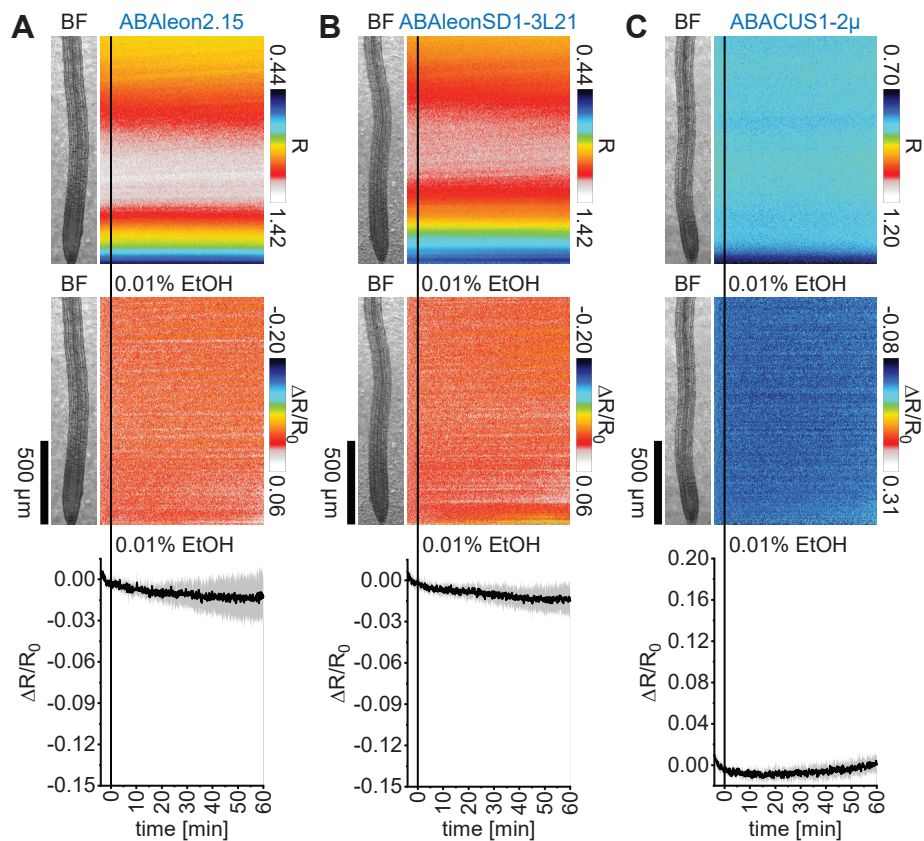

**Supplemental Figure 2.** Solvent control experiments of ABA indicators in Arabidopsis. Five-day-old roots of Arabidopsis expressing (A) ABAlleon2.15 ( $n = 6$ ), (B) ABAlleonSD1-3L21 ( $n = 7$ ) and (C) ABACUS1-2 $\mu$  ( $n = 6$ ) were imaged for 64 min at a frame rate of 10 min<sup>-1</sup> and treated with 0.01 % EtOH (solvent control for ABA) at  $t = 0$  min. Shown are average vertical response profiles of (top) emission ratios ( $R$ ) and (middle) emission ratio changes ( $\Delta R/R_0$ ) normalized to 4 min average baseline recordings. An adjacent representative bright field (BF) root image is shown for orientation. (bottom) Full image average emission ratio changes (mean  $\pm$  SD). Color scales of response profiles are identical to the scales in Figure 2.

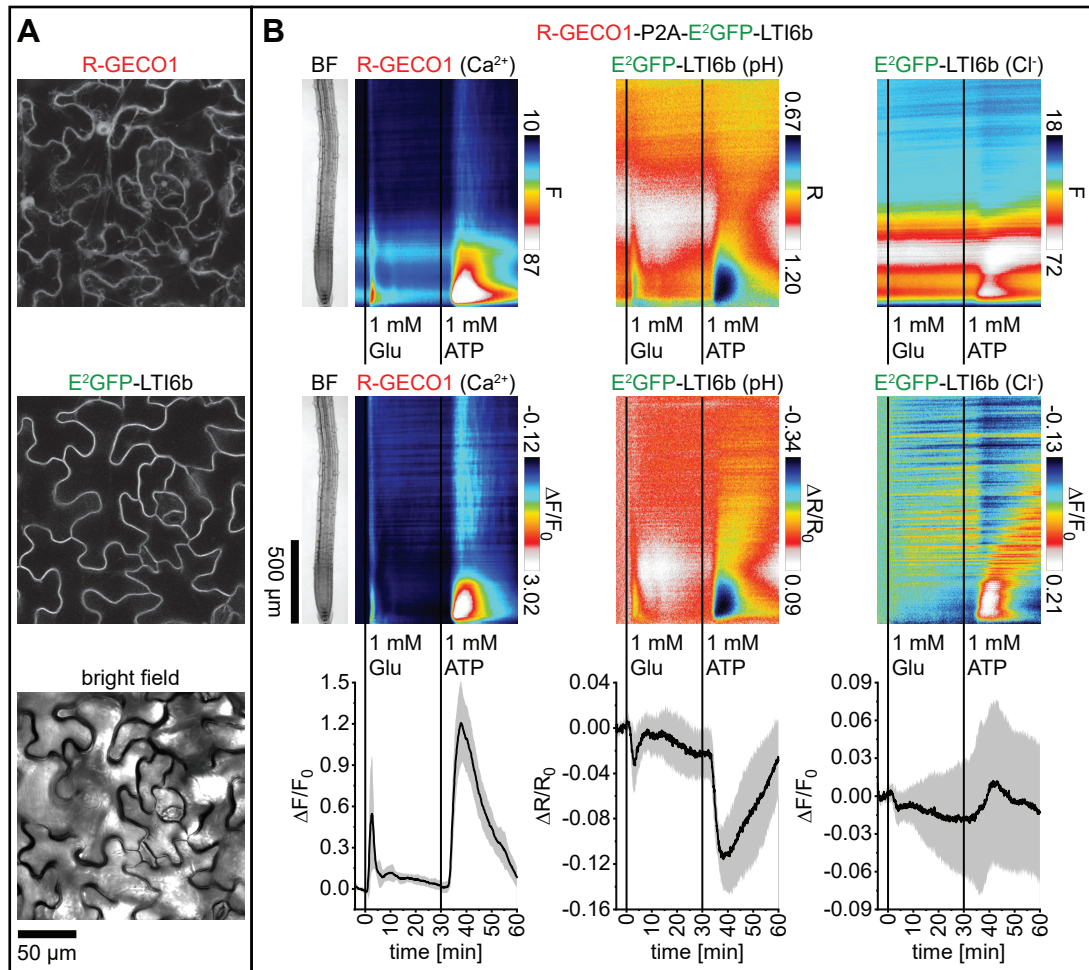

**Supplemental Figure 3.** Targeting of E<sup>2</sup>GFP to the plasma membrane. **(A)** Subcellular localization of R-GECO1-P2A-E<sup>2</sup>GFP-LTI6b fluorescence emission in epidermis cells of three-week-old Arabidopsis leaves. **(B)** Analyses of five-day-old roots of Arabidopsis expressing R-GECO1-P2A-E<sup>2</sup>GFP-LTI6b in response to 1 mM glutamate (Glu; t = 0 min) and 1 mM ATP (t = 30 min; n = 8). Images were acquired for 64 min at a frame rate of 10 min<sup>-1</sup>. Average vertical response profiles of (top) fluorescence emissions (F) or emission ratios (R) and (middle) signal changes ( $\Delta F/F_0$  or  $\Delta R/R_0$ ) normalized to 4 min average baseline recordings. An adjacent representative bright field (BF) root image is shown for orientation. (bottom) Full image signal changes (mean  $\pm$  SD). These data are related to experiments presented in Figure 5.



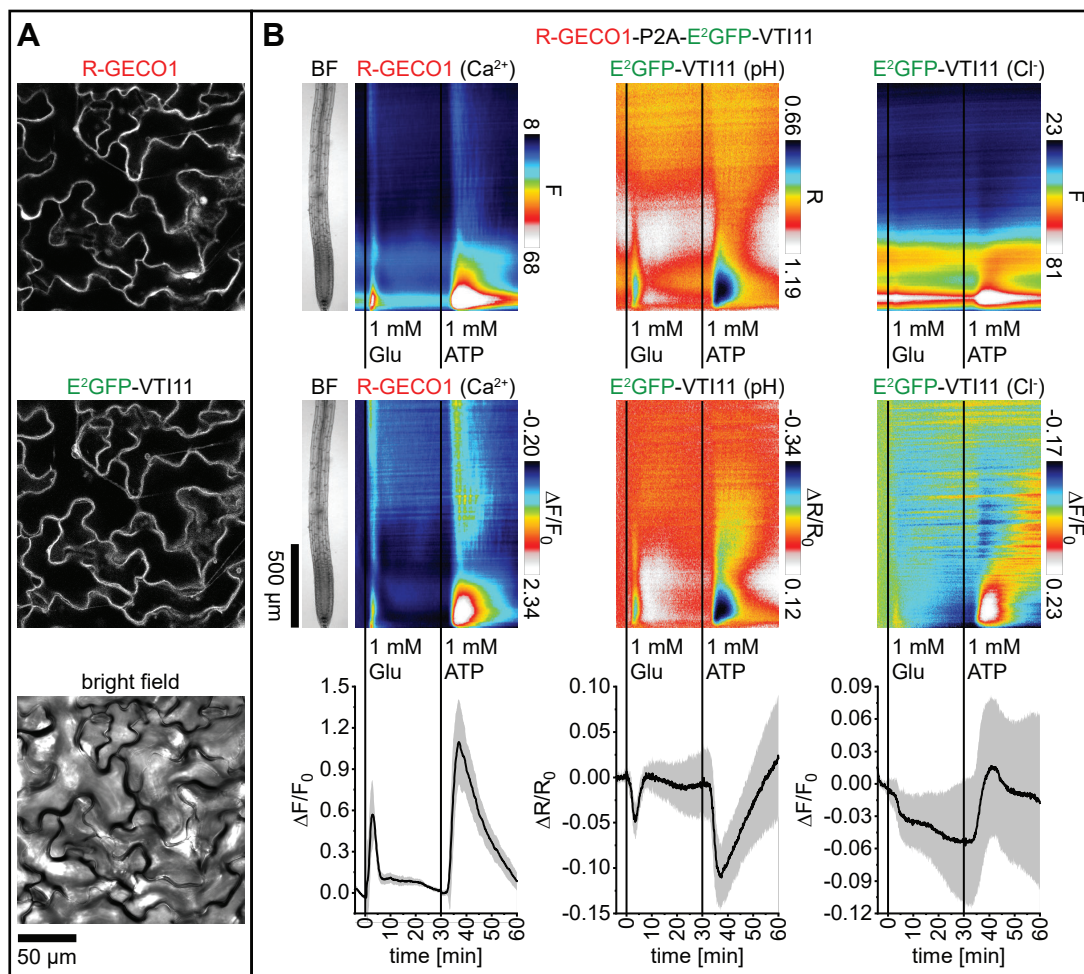

**Supplemental Figure 4.** Targeting of E<sup>2</sup>GFP to the tonoplast. **(A)** Subcellular localization of R-GECO1-P2A-E<sup>2</sup>GFP-VT11 fluorescence emission in epidermis cells of three-week-old Arabidopsis leaves. **(B)** Analyses of five-day-old roots of Arabidopsis expressing R-GECO1-P2A-E<sup>2</sup>GFP-VT11 in response to 1 mM glutamate (Glu; t = 0 min) and 1 mM ATP (t = 30 min; n = 8). Images were acquired for 64 min at a frame rate of 10 min<sup>-1</sup>. Average vertical response profiles of (top) fluorescence emissions (F) or emission ratios (R) and (middle) signal changes ( $\Delta F/F_0$  or  $\Delta R/R_0$ ) normalized to 4 min average baseline recordings. An adjacent representative bright field (BF) root image is shown for orientation. (bottom) Full image signal changes (mean  $\pm$  SD). These data are related to experiments presented in Figure 5.

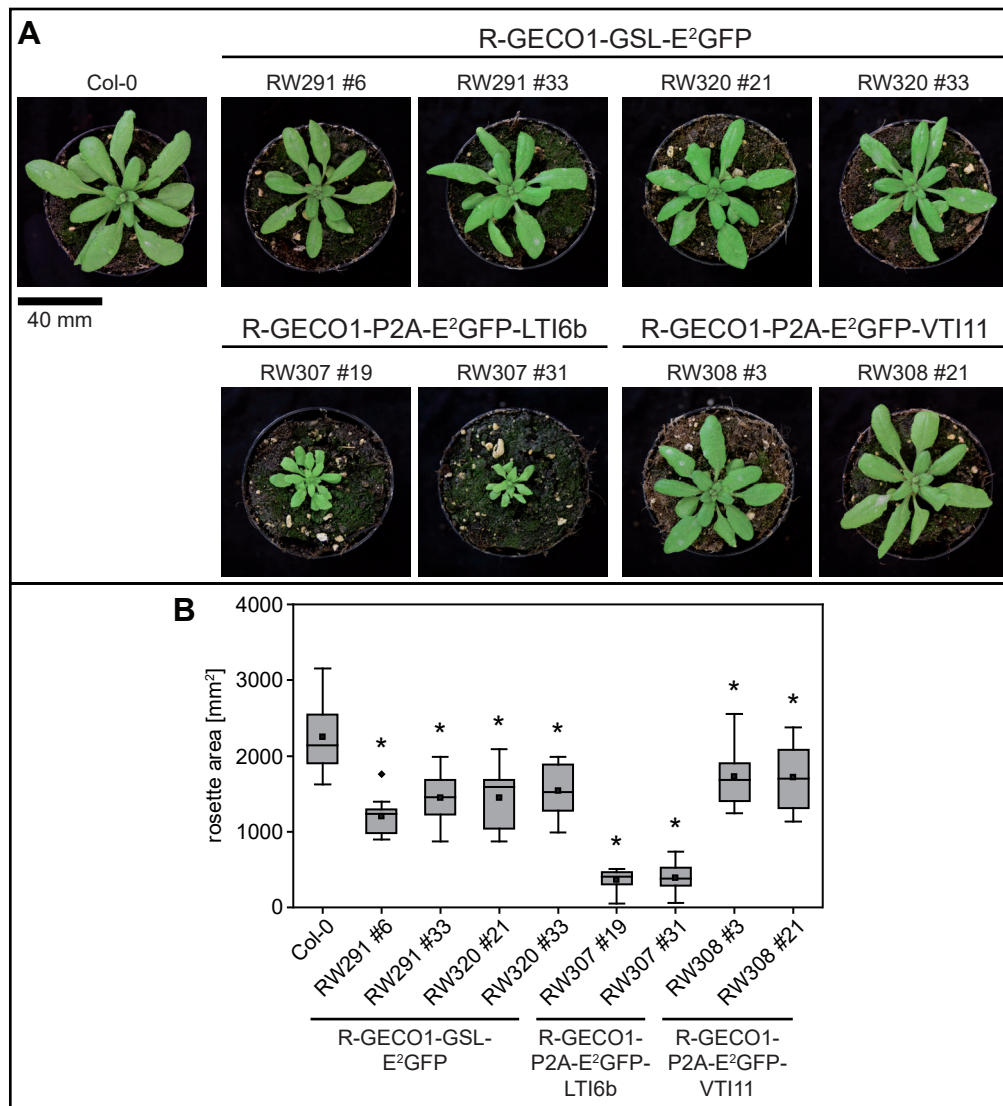

**Supplemental Figure 5.** Targeting of E<sup>2</sup>GFP to the plasma membrane induces plant growth defects. **(A)** Representative images of 28-day-old Arabidopsis lines expressing the indicated 2-In-1-GEFIs. **(B)** Rosette area quantification of 28-day-old 2-In-1-GEFI lines (square dots, mean; central lines in boxes, median; boxes, 25<sup>th</sup> and 75<sup>th</sup> percentiles, whiskers,  $\pm$  1.5 interquartile range; diamond dots, outliers). Asterisks indicate statistically significant differences relative to Col-0 wild type in pairwise Tukey test comparisons ( $p < 0.05$ ;  $n = 9-12$ ). These data are related to Figure 5 and Supplemental Figures 3 and 4.



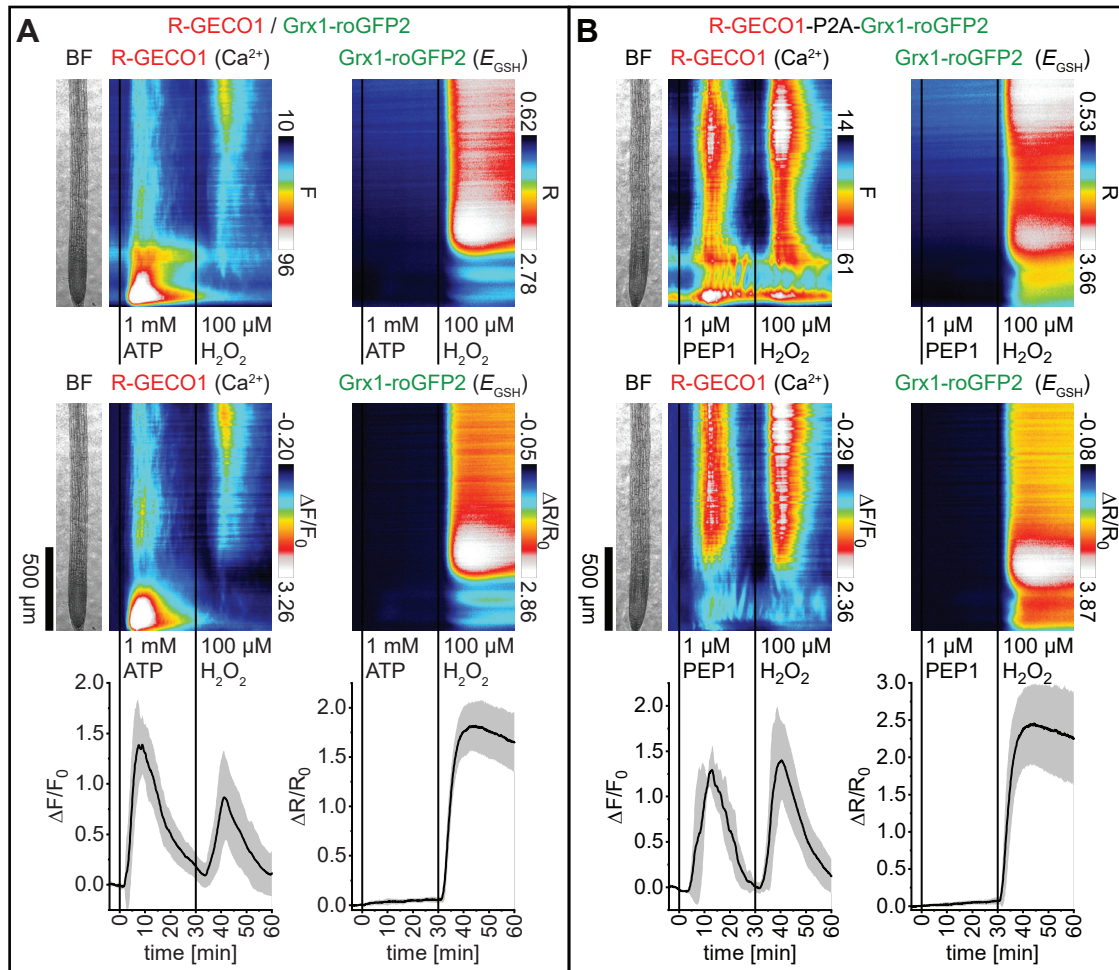

**Supplemental Figure 6.** Cytosolic  $E_{\text{GSH}}$  is only weakly affected by ATP and PEP1 treatments. Analyses of five-day-old roots of Arabidopsis expressing **(A)** R-GECO1 and Grx1-roGFP2 ( $\text{Ca}^{2+}$  and  $E_{\text{GSH}}$ ;  $n = 8$ ) in response to 1 mM ATP and 100  $\mu\text{M}$   $\text{H}_2\text{O}_2$ , and **(B)** R-GECO1-P2A-Grx1-roGFP2 ( $\text{Ca}^{2+}$  and  $E_{\text{GSH}}$ ;  $n = 7$ ) in response to 1  $\mu\text{M}$  PEP1 and 100  $\mu\text{M}$   $\text{H}_2\text{O}_2$ . Average vertical response profiles of (top) fluorescence emissions (F) or emission ratios (R) and (middle) signal changes ( $\Delta F/F_0$  or  $\Delta R/R_0$ ) normalized to 4 min average baseline recordings. An adjacent representative bright field (BF) root image is shown for orientation. (bottom) Full image signal changes (mean  $\pm$  SD). Representative experiments are provided as Supplemental Movies 12 and 13. These data are related to experiments presented in Figure 8.

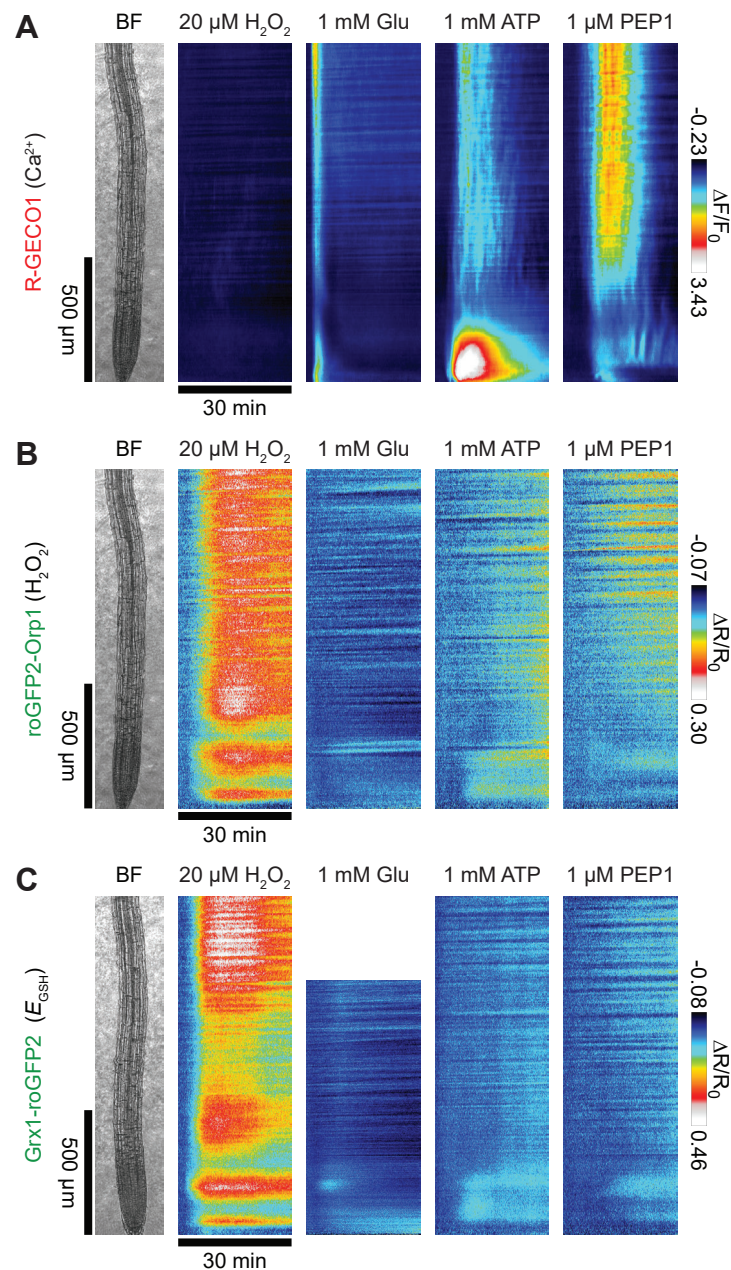

**Supplemental Figure 7.** Glutamate-, ATP- and PEP1-dependent cytosolic oxidation is below the threshold of ROS-induced  $\text{Ca}^{2+}$  signaling. 30 min signal change ( $\Delta F/F_0$  or  $\Delta R/R_0$ ) vertical response profiles of **(A)** R-GECO1 ( $\text{Ca}^{2+}$ ), **(B)** roGFP2-Orp1 ( $\text{H}_2\text{O}_2$ ) and **(C)** Grx1-roGFP2 ( $E_{\text{GSH}}$ ) after treatments with 20  $\mu\text{M}$   $\text{H}_2\text{O}_2$ , 1 mM glutamate (Glu), 1 mM ATP and 1  $\mu\text{M}$  PEP1. These data were taken from analyses presented in Figure 7 ( $\text{H}_2\text{O}_2$ ), Figures 5A and 6B (Glu) and Figure 8 and Supplemental Figure 6 (ATP and PEP1) and scaled to the adjacent color scale.

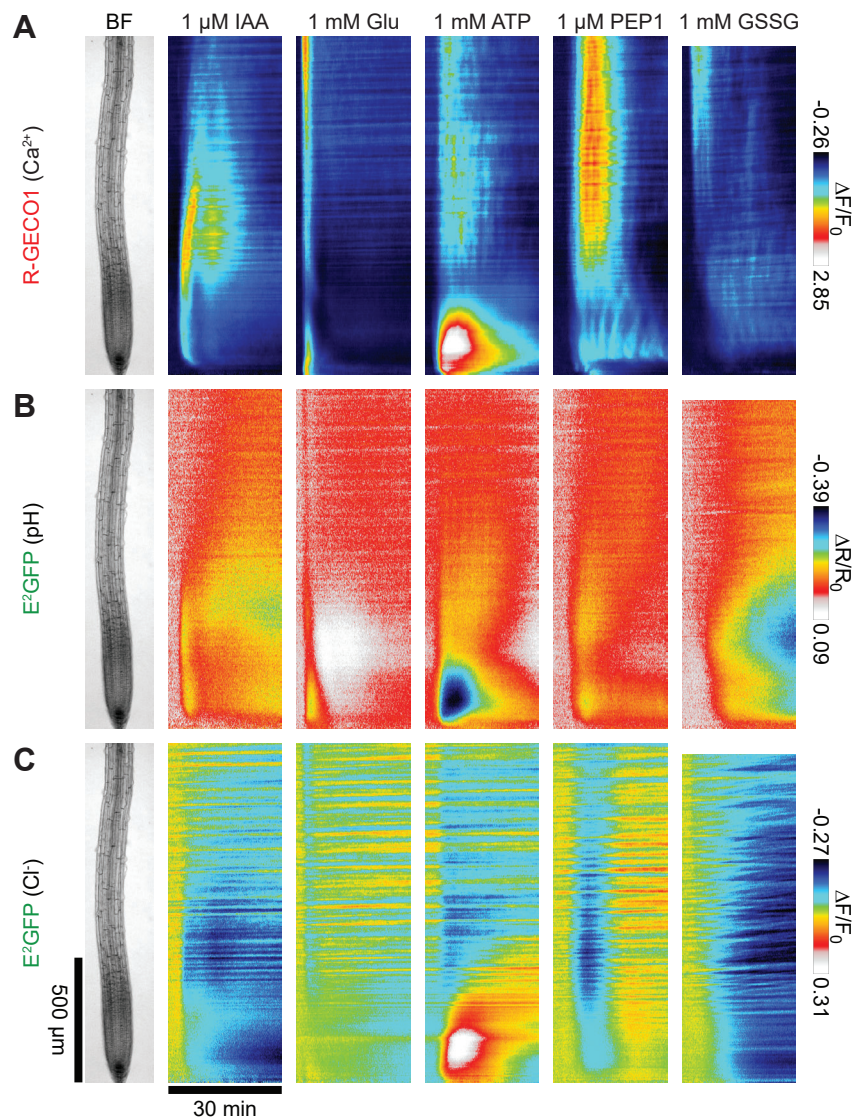

**Supplemental Figure 8.**  $\text{Ca}^{2+}$ ,  $\text{H}^+$  and anion fluxes exhibit a high spatiotemporal overlap. 30 min signal change ( $\Delta F/F_0$  or  $\Delta R/R_0$ ) vertical response profiles of **(A)** R-GECO1 ( $\text{Ca}^{2+}$ ), **(B)** E<sup>2</sup>GFP ( $\text{H}^+$ ) and **(C)** E<sup>2</sup>GFP (Cl<sup>-</sup>/anions) after treatments with 1  $\mu$ M IAA, 1 mM glutamate (Glu), 1 mM ATP, 1  $\mu$ M PEP1 and 1 mM GSSG. These data were taken from analyses presented in Figure 4 (IAA), Figure 5 (Glu and ATP) Figure 9 (PEP1) and Figure 10 (GSSG) and scaled to the adjacent color scale.



## Parsed Citations

- Allen, G.J., Chu, S.P., Harrington, C.L., Schumacher, K., Hoffmann, T., Tang, Y.Y., Grill, E., and Schroeder, J.I. (2001). A defined range of guard cell calcium oscillation parameters encodes stomatal movements. *Nature* 411, 1053-1057.**  
Pubmed: [Author and Title](#)  
Google Scholar: [Author Only Title Only Author and Title](#)
- Arosio, D., Ricci, F., Marchetti, L., Galdani, R., Albertazzi, L., and Beltram, F. (2010). Simultaneous intracellular chloride and pH measurements using a GFP-based sensor. *Nat Methods* 7, 516-518.**  
Pubmed: [Author and Title](#)  
Google Scholar: [Author Only Title Only Author and Title](#)
- Barragán, V., Leidi, E.O., Andrés, Z., Rubio, L., De Luca, A., Fernández, J.A., Cubero, B., and Pardo, J.M. (2012). Ion exchangers NHX1 and NHX2 mediate active potassium uptake into vacuoles to regulate cell turgor and stomatal function in *Arabidopsis*. *Plant Cell* 24, 1127-1142.**  
Pubmed: [Author and Title](#)  
Google Scholar: [Author Only Title Only Author and Title](#)
- Behera, S., Zhaolong, X., Luoni, L., Bonza, M.C., Doccuola, F.G., De Michelis, M.I., Morris, R.J., Schwarzländer, M., and Costa, A. (2018). Cellular Ca<sup>2+</sup> Signals Generate Defined pH Signatures in Plants. *Plant Cell* 30, 2704-2719.**  
Pubmed: [Author and Title](#)  
Google Scholar: [Author Only Title Only Author and Title](#)
- Bilan, D.S., and Belousov, V.V. (2017). New tools for redox biology: From imaging to manipulation. *Free Radic Biol Med* 109, 167-188.**  
Pubmed: [Author and Title](#)  
Google Scholar: [Author Only Title Only Author and Title](#)
- Bizzarri, R., Arcangeli, C., Arosio, D., Ricci, F., Faraci, P., Cardarelli, F., and Beltram, F. (2006). Development of a novel GFP-based ratiometric excitation and emission pH indicator for intracellular studies. *Biophys J* 90, 3300-3314.**  
Pubmed: [Author and Title](#)  
Google Scholar: [Author Only Title Only Author and Title](#)
- Bonza, M.C., and De Michelis, M.I. (2011). The plant Ca<sup>2+</sup>-ATPase repertoire: biochemical features and physiological functions. *Plant Biol (Stuttg)* 13, 421-430.**  
Pubmed: [Author and Title](#)  
Google Scholar: [Author Only Title Only Author and Title](#)
- Burén, S., Ortega-Villasante, C., Otvös, K., Samuelsson, G., Bakó, L., and Villarejo, A. (2012). Use of the foot-and-mouth disease virus 2A peptide co-expression system to study intracellular protein trafficking in *Arabidopsis*. *PLoS One* 7, e51973.**  
Pubmed: [Author and Title](#)  
Google Scholar: [Author Only Title Only Author and Title](#)
- Chen, D., Cao, Y., Li, H., Kim, D., Ahsan, N., Thelen, J., and Stacey, G. (2017). Extracellular ATP elicits DORN1-mediated RBOHD phosphorylation to regulate stomatal aperture. *Nat Commun* 8, 2265.**  
Pubmed: [Author and Title](#)  
Google Scholar: [Author Only Title Only Author and Title](#)
- Choi, J., Tanaka, K., Cao, Y., Qi, Y., Qiu, J., Liang, Y., Lee, S.Y., and Stacey, G. (2014). Identification of a plant receptor for extracellular ATP. *Science* 343, 290-294.**  
Pubmed: [Author and Title](#)  
Google Scholar: [Author Only Title Only Author and Title](#)
- Choi, W.G., Hilleary, R., Swanson, S.J., Kim, S.H., and Gilroy, S. (2016). Rapid, Long-Distance Electrical and Calcium Signaling in Plants. *Annu Rev Plant Biol* 67, 287-307.**  
Pubmed: [Author and Title](#)  
Google Scholar: [Author Only Title Only Author and Title](#)
- Clough, S.J., and Bent, A.F. (1998). Floral dip: a simplified method for *Agrobacterium*-mediated transformation of *Arabidopsis thaliana*. *Plant J* 16, 735-743.**  
Pubmed: [Author and Title](#)  
Google Scholar: [Author Only Title Only Author and Title](#)
- Cutler, S.R., Rodriguez, P.L., Finkelstein, R.R., and Abrams, S.R. (2010). Abscisic acid: emergence of a core signaling network. *Annu Rev Plant Biol* 61, 651-679.**  
Pubmed: [Author and Title](#)  
Google Scholar: [Author Only Title Only Author and Title](#)
- De Vylder, J., Vandebussche, F., Hu, Y., Philips, W., and Van Der Straeten, D. (2012). Rosette tracker: an open source image analysis tool for automatic quantification of genotype effects. *Plant Physiol* 160, 1149-1159.**  
Pubmed: [Author and Title](#)  
Google Scholar: [Author Only Title Only Author and Title](#)
- Demidchik, V., Shabala, S.N., and Davies, J.M. (2007). Spatial variation in H<sub>2</sub>O<sub>2</sub> response of *Arabidopsis thaliana* root epidermal Ca<sup>2+</sup> flux and plasma membrane Ca<sup>2+</sup> channels. *Plant J* 49, 377-386.**

Pubmed: [Author and Title](#)

Google Scholar: [Author Only Title Only Author and Title](#)

**Demidchik, V., Shang, Z., Shin, R., Thompson, E., Rubio, L., Laohavisit, A., Mortimer, J.C., Chivasa, S., Slabas, A.R., Glover, B.J., Schachtman, D.P., Shabala, S.N., and Davies, J.M. (2009). Plant extracellular ATP signalling by plasma membrane NADPH oxidase and Ca<sup>2+</sup> channels. *Plant J* 58, 903-913.**

Pubmed: [Author and Title](#)

Google Scholar: [Author Only Title Only Author and Title](#)

**Dindas, J., Scherzer, S., Roelfsema, M.R.G., von Meyer, K., Müller, H.M., Al-Rasheid, K.A.S., Palme, K., Dietrich, P., Becker, D., Bennett, M.J., and Hedrich, R. (2018). AUX1-mediated root hair auxin influx governs SCFTIR1/AFB-type Ca<sup>2+</sup> signaling. *Nat Commun* 9, 1174.**

Pubmed: [Author and Title](#)

Google Scholar: [Author Only Title Only Author and Title](#)

**Dodd, A.N., Kudla, J., and Sanders, D. (2010). The language of calcium signaling. *Annu Rev Plant Biol* 61, 593-620.**

Pubmed: [Author and Title](#)

Google Scholar: [Author Only Title Only Author and Title](#)

**Edel, K.H., and Kudla, J. (2016). Integration of calcium and ABA signaling. *Curr Opin Plant Biol* 33, 83-91.**

Pubmed: [Author and Title](#)

Google Scholar: [Author Only Title Only Author and Title](#)

**Evans, M.J., Choi, W.G., Gilroy, S., and Morris, R.J. (2016). A ROS-Assisted Calcium Wave Dependent on the AtRBOHD NADPH Oxidase and TPC1 Cation Channel Propagates the Systemic Response to Salt Stress. *Plant Physiol* 171, 1771-1784.**

Pubmed: [Author and Title](#)

Google Scholar: [Author Only Title Only Author and Title](#)

**Fendrych, M., Leung, J., and Friml, J. (2016). TIR1/AFB-Aux/IAA auxin perception mediates rapid cell wall acidification and growth of *Arabidopsis hypocotyls*. *Elife* 5, e19048.**

Pubmed: [Author and Title](#)

Google Scholar: [Author Only Title Only Author and Title](#)

**Finkelstein, R. (2013). Abscisic Acid synthesis and response. *Arabidopsis Book* 11, e0166.**

Pubmed: [Author and Title](#)

Google Scholar: [Author Only Title Only Author and Title](#)

**Gao, Q.F., Gu, L.L., Wang, H.Q., Fei, C.F., Fang, X., Hussain, J., Sun, S.J., Dong, J.Y., Liu, H., and Wang, Y.F. (2016). Cyclic nucleotide-gated channel 18 is an essential Ca<sup>2+</sup> channel in pollen tube tips for pollen tube guidance to ovules in *Arabidopsis*. *Proc Natl Acad Sci U S A* 113, 3096-3101.**

Pubmed: [Author and Title](#)

Google Scholar: [Author Only Title Only Author and Title](#)

**Gilroy, S., Suzuki, N., Miller, G., Choi, W.G., Toyota, M., Devireddy, A.R., and Mittler, R. (2014). A tidal wave of signals: calcium and ROS at the forefront of rapid systemic signaling. *Trends Plant Sci* 19, 623-630.**

Pubmed: [Author and Title](#)

Google Scholar: [Author Only Title Only Author and Title](#)

**Gomez, L.D., Noctor, G., Knight, M.R., and Foyer, C.H. (2004). Regulation of calcium signalling and gene expression by glutathione. *J Exp Bot* 55, 1851-1859.**

Pubmed: [Author and Title](#)

Google Scholar: [Author Only Title Only Author and Title](#)

**Grossmann, G., Krebs, M., Maizel, A., Stahl, Y., Vermeer, J.E.M., and Ott, T. (2018). Green light for quantitative live-cell imaging in plants. *J Cell Sci* 131.**

Pubmed: [Author and Title](#)

Google Scholar: [Author Only Title Only Author and Title](#)

**Gutscher, M., Pauleau, A.L., Marty, L., Brach, T., Wabnitz, G.H., Samstag, Y., Meyer, A.J., and Dick, T.P. (2008). Real-time imaging of the intracellular glutathione redox potential. *Nat Methods* 5, 553-559.**

Pubmed: [Author and Title](#)

Google Scholar: [Author Only Title Only Author and Title](#)

**Gutscher, M., Sobotta, M.C., Wabnitz, G.H., Ballikaya, S., Meyer, A.J., Samstag, Y., and Dick, T.P. (2009). Proximity-based protein thiol oxidation by H<sub>2</sub>O<sub>2</sub>-scavenging peroxidases. *J Biol Chem* 284, 31532-31540.**

Pubmed: [Author and Title](#)

Google Scholar: [Author Only Title Only Author and Title](#)

**Han, J.P., Köster, P., Drerup, M.M., Scholz, M., Li, S., Edel, K.H., Hashimoto, K., Kuchitsu, K., Hippler, M., and Kudla, J. (2019). Fine tuning of RBOHF activity is achieved by differential phosphorylation and Ca<sup>2+</sup> binding. *New Phytol* 221, 1935-1949.**

Pubmed: [Author and Title](#)

Google Scholar: [Author Only Title Only Author and Title](#)

**Haruta, M., Sabat, G., Stecker, K., Minkoff, B.B., and Sussman, M.R. (2014). A peptide hormone and its receptor protein kinase regulate plant cell expansion. *Science* 343, 408-411.**

Pubmed: [Author and Title](#)

Google Scholar: [Author Only](#) [Title Only](#) [Author and Title](#)

**Haruta, M., Gray, W.M., and Sussman, M.R. (2015). Regulation of the plasma membrane proton pump (H(+)-ATPase) by phosphorylation. *Curr Opin Plant Biol* 28, 68-75.**

Pubmed: [Author and Title](#)

Google Scholar: [Author Only](#) [Title Only](#) [Author and Title](#)

**Hauser, F., Waadt, R., and Schroeder, J.I. (2011). Evolution of abscisic acid synthesis and signaling mechanisms. *Curr Biol* 21, R346-355.**

Pubmed: [Author and Title](#)

Google Scholar: [Author Only](#) [Title Only](#) [Author and Title](#)

**Hauser, F., Li, Z, Waadt, R., and Schroeder, J.I. (2017). SnapShot: Abscisic Acid Signaling. *Cell* 171, 1708-1708.e1700.**

Pubmed: [Author and Title](#)

Google Scholar: [Author Only](#) [Title Only](#) [Author and Title](#)

**Hedrich, R., Busch, H., and Raschke, K. (1990). Ca<sup>2+</sup> and nucleotide dependent regulation of voltage dependent anion channels in the plasma membrane of guard cells. *EMBO J* 9, 3889-3892.**

Pubmed: [Author and Title](#)

Google Scholar: [Author Only](#) [Title Only](#) [Author and Title](#)

**Heppler, P.K., and Winship, L.J. (2010). Calcium at the cell wall-cytoplasm interface. *J Integr Plant Biol* 52, 147-160.**

Pubmed: [Author and Title](#)

Google Scholar: [Author Only](#) [Title Only](#) [Author and Title](#)

**Hilleary, R., Choi, W.G., Kim, S.H., Lim, S.D., and Gilroy, S. (2018). Sense and sensibility: the use of fluorescent protein-based genetically encoded biosensors in plants. *Curr Opin Plant Biol* 46, 32-38.**

Pubmed: [Author and Title](#)

Google Scholar: [Author Only](#) [Title Only](#) [Author and Title](#)

**Hochreiter, B., Garcia, A.P., and Schmid, J.A. (2015). Fluorescent proteins as genetically encoded FRET biosensors in life sciences. *Sensors (Basel)* 15, 26281-26314.**

Pubmed: [Author and Title](#)

Google Scholar: [Author Only](#) [Title Only](#) [Author and Title](#)

**Hruz, T., Laule, O., Szabo, G., Wessendorp, F., Bleuler, S., Oertle, L., Widmayer, P., Gruissem, W., and Zimmermann, P. (2008). Geneinvestigator v3: a reference expression database for the meta-analysis of transcriptomes. *Adv Bioinformatics* 2008, 420747.**

Pubmed: [Author and Title](#)

Google Scholar: [Author Only](#) [Title Only](#) [Author and Title](#)

**Inoue, S.I., Takahashi, K., Okumura-Noda, H., and Kinoshita, T. (2016). Auxin Influx Carrier AUX1 Confers Acid Resistance for Arabidopsis Root Elongation Through the Regulation of Plasma Membrane H<sup>+</sup>-ATPase. *Plant Cell Physiol* 57, 2194-2201.**

Pubmed: [Author and Title](#)

Google Scholar: [Author Only](#) [Title Only](#) [Author and Title](#)

**Jones, A.M., Danielson, J.A., Manojkumar, S.N., Lanquar, V., Grossmann, G., and Frommer, W.B. (2014). Abscisic acid dynamics in roots detected with genetically encoded FRET sensors. *Elife* 3, e01741.**

Pubmed: [Author and Title](#)

Google Scholar: [Author Only](#) [Title Only](#) [Author and Title](#)

**Kadota, Y., Sklenar, J., Derbyshire, P., Stransfeld, L., Asai, S., Ntoukakis, V., Jones, J.D., Shirasu, K., Menke, F., Jones, A., and Zipfel, C. (2014). Direct regulation of the NADPH oxidase RBOHD by the PRR-associated kinase BIK1 during plant immunity. *Mol Cell* 54, 43-55.**

Pubmed: [Author and Title](#)

Google Scholar: [Author Only](#) [Title Only](#) [Author and Title](#)

**Kadota, Y., Shirasu, K., and Zipfel, C. (2015). Regulation of the NADPH Oxidase RBOHD During Plant Immunity. *Plant Cell Physiol* 56, 1472-1480.**

Pubmed: [Author and Title](#)

Google Scholar: [Author Only](#) [Title Only](#) [Author and Title](#)

**Kärkönen, A., and Kuchitsu, K. (2015). Reactive oxygen species in cell wall metabolism and development in plants. *Phytochemistry* 112, 22-32.**

Pubmed: [Author and Title](#)

Google Scholar: [Author Only](#) [Title Only](#) [Author and Title](#)

**Keinath, N.F., Waadt, R., Brugman, R., Schroeder, J.I., Grossmann, G., Schumacher, K., and Krebs, M. (2015). Live Cell Imaging with R-GECO1 Sheds Light on flg22- and Chitin-Induced Transient [Ca<sup>2+</sup>]<sub>cyt</sub> Patterns in Arabidopsis. *Mol Plant* 8, 1188-1200.**

Pubmed: [Author and Title](#)

Google Scholar: [Author Only](#) [Title Only](#) [Author and Title](#)

**Kelner, A., Leitão, N., Chabaud, M., Charpentier, M., and de Carvalho-Niebel, F. (2018). Dual Color Sensors for Simultaneous Analysis of Calcium Signal Dynamics in the Nuclear and Cytoplasmic Compartments of Plant Cells. *Front Plant Sci* 9, 245.**

Pubmed: [Author and Title](#)

Google Scholar: [Author Only](#) [Title Only](#) [Author and Title](#)



Kim, J.H., Lee, S.R., Li, L.H., Park, H.J., Park, J.H., Lee, K.Y., Kim, M.K., Shin, B.A., and Choi, S.Y. (2011). High cleavage efficiency of a 2A peptide derived from porcine teschovirus-1 in human cell lines, zebrafish and mice. *PLoS One* 6, e18556.

Pubmed: [Author and Title](#)

Google Scholar: [Author Only](#) [Title Only](#) [Author and Title](#)

Kimura, S., Waszczak, C., Hunter, K., and Wrzaczek, M. (2017). Bound by Fate: The Role of Reactive Oxygen Species in Receptor-Like Kinase Signaling. *Plant Cell* 29, 638-654.

Pubmed: [Author and Title](#)

Google Scholar: [Author Only](#) [Title Only](#) [Author and Title](#)

Köhler, B., Hills, A., and Blatt, M.R. (2003). Control of guard cell ion channels by hydrogen peroxide and abscisic acid indicates their action through alternate signaling pathways. *Plant Physiol* 131, 385-388.

Pubmed: [Author and Title](#)

Google Scholar: [Author Only](#) [Title Only](#) [Author and Title](#)

Kostyuk, A.I., Panova, A.S., Bilan, D.S., and Belousov, V.V. (2018). Redox biosensors in a context of multiparameter imaging. *Free Radic Biol Med* 128, 23-39.

Pubmed: [Author and Title](#)

Google Scholar: [Author Only](#) [Title Only](#) [Author and Title](#)

Kudla, J., Batistic, O., and Hashimoto, K. (2010). Calcium signals: the lead currency of plant information processing. *Plant Cell* 22, 541-563.

Pubmed: [Author and Title](#)

Google Scholar: [Author Only](#) [Title Only](#) [Author and Title](#)

Kwak, J.M., Mori, I.C., Pei, Z.M., Leonhardt, N., Torres, M.A., Dangl, J.L., Bloom, R.E., Bodde, S., Jones, J.D., and Schroeder, J.I. (2003). NADPH oxidase *AtrbohD* and *AtrbohF* genes function in ROS-dependent ABA signaling in Arabidopsis. *EMBO J* 22, 2623-2633.

Pubmed: [Author and Title](#)

Google Scholar: [Author Only](#) [Title Only](#) [Author and Title](#)

Lampropoulos, A., Sutikovic, Z., Wenzl, C., Maegle, I., Lohmann, J.U., and Forner, J. (2013). GreenGate—a novel, versatile, and efficient cloning system for plant transgenesis. *PLoS One* 8, e83043.

Pubmed: [Author and Title](#)

Google Scholar: [Author Only](#) [Title Only](#) [Author and Title](#)

Li, L., Li, M., Yu, L., Zhou, Z., Liang, X., Liu, Z., Cai, G., Gao, L., Zhang, X., Wang, Y., Chen, S., and Zhou, J.M. (2014). The FLS2-associated kinase BIK1 directly phosphorylates the NADPH oxidase *RbohD* to control plant immunity. *Cell Host Microbe* 15, 329-338.

Pubmed: [Author and Title](#)

Google Scholar: [Author Only](#) [Title Only](#) [Author and Title](#)

Liu, Z., Wu, Y., Yang, F., Zhang, Y., Chen, S., Xie, Q., Tian, X., and Zhou, J.M. (2013). BIK1 interacts with PEPRs to mediate ethylene-induced immunity. *Proc Natl Acad Sci U S A* 110, 6205-6210.

Pubmed: [Author and Title](#)

Google Scholar: [Author Only](#) [Title Only](#) [Author and Title](#)

Loro, G., Drago, I., Pozzan, T., Schiavo, F.L., Zottini, M., and Costa, A. (2012). Targeting of Cameleons to various subcellular compartments reveals a strict cytoplasmic/mitochondrial Ca<sup>2+</sup> handling relationship in plant cells. *Plant J* 71, 1-13.

Pubmed: [Author and Title](#)

Google Scholar: [Author Only](#) [Title Only](#) [Author and Title](#)

Ma, C., Guo, J., Kang, Y., Doman, K., Bryan, A.C., Tax, F.E., Yamaguchi, Y., and Qi, Z. (2014). *At*PEPTIDE RECEPTOR2 mediates the *At*PEPTIDE1-induced cytosolic Ca<sup>2+</sup> rise, which is required for the suppression of Glutamine Dumper gene expression in Arabidopsis roots. *J Integr Plant Biol* 56, 684-694.

Pubmed: [Author and Title](#)

Google Scholar: [Author Only](#) [Title Only](#) [Author and Title](#)

Mangano, S., Juárez, S.P., and Estevez, J.M. (2016). ROS Regulation of Polar Growth in Plant Cells. *Plant Physiol* 171, 1593-1605.

Pubmed: [Author and Title](#)

Google Scholar: [Author Only](#) [Title Only](#) [Author and Title](#)

Martynov, V.I., Pakhomov, A.A., Deyev, I.E., and Petrenko, A.G. (2018). Genetically encoded fluorescent indicators for live cell pH imaging. *Biochim Biophys Acta Gen Subj* 1862, 2924-2939.

Pubmed: [Author and Title](#)

Google Scholar: [Author Only](#) [Title Only](#) [Author and Title](#)

Michard, E., Simon, A.A., Tavares, B., Wudick, M.M., and Feijó, J.A. (2017). Signaling with Ions: The Keystone for Apical Cell Growth and Morphogenesis in Pollen Tubes. *Plant Physiol* 173, 91-111.

Pubmed: [Author and Title](#)

Google Scholar: [Author Only](#) [Title Only](#) [Author and Title](#)

Mishina, N.M., Bogeski, I., Bolotin, D.A., Hoth, M., Niemeyer, B.A., Schultz, C., Zagaynova, E.V., Lukyanov, S., and Belousov, V.V. (2012). Can we see PIP(3) and hydrogen peroxide with a single probe? *Antioxid Redox Signal* 17, 505-512.

Pubmed: [Author and Title](#)

Google Scholar: [Author Only](#) [Title Only](#) [Author and Title](#)

Mittler, R. (2017). ROS Are Good. *Trends Plant Sci* 22, 11-19.

Pubmed: [Author and Title](#)

Google Scholar: [Author Only Title Only Author and Title](#)

Monshausen, G.B., Bibikova, T.N., Messerli, M.A., Shi, C., and Gilroy, S. (2007). Oscillations in extracellular pH and reactive oxygen species modulate tip growth of Arabidopsis root hairs. *Proc Natl Acad Sci U S A* 104, 20996-21001.

Pubmed: [Author and Title](#)

Google Scholar: [Author Only Title Only Author and Title](#)

Monshausen, G.B., Bibikova, T.N., Weisenseel, M.H., and Gilroy, S. (2009). Ca<sup>2+</sup> regulates reactive oxygen species production and pH during mechanosensing in Arabidopsis roots. *Plant Cell* 21, 2341-2356.

Pubmed: [Author and Title](#)

Google Scholar: [Author Only Title Only Author and Title](#)

Monshausen, G.B., Miller, N.D., Murphy, A.S., and Gilroy, S. (2011). Dynamics of auxin-dependent Ca<sup>2+</sup> and pH signaling in root growth revealed by integrating high-resolution imaging with automated computer vision-based analysis. *Plant J* 65, 309-318.

Pubmed: [Author and Title](#)

Google Scholar: [Author Only Title Only Author and Title](#)

Mori, I.C., Murata, Y., Yang, Y., Munemasa, S., Wang, Y.F., Andreoli, S., Tiriach, H., Alonso, J.M., Harper, J.F., Ecker, J.R., Kwak, J.M., and Schroeder, J.I. (2006). CDPKs CPK6 and CPK3 function in ABA regulation of guard cell S-type anion- and Ca(2+)-permeable channels and stomatal closure. *PLoS Biol* 4, e327.

Pubmed: [Author and Title](#)

Google Scholar: [Author Only Title Only Author and Title](#)

Munemasa, S., Hauser, F., Park, J., Waadt, R., Brandt, B., and Schroeder, J.I. (2015). Mechanisms of abscisic acid-mediated control of stomatal aperture. *Curr Opin Plant Biol* 28, 154-162.

Pubmed: [Author and Title](#)

Google Scholar: [Author Only Title Only Author and Title](#)

Nagaya, S., Kawamura, K., Shinmyo, A., and Kato, K. (2010). The HSP terminator of Arabidopsis thaliana increases gene expression in plant cells. *Plant Cell Physiol* 51, 328-332.

Pubmed: [Author and Title](#)

Google Scholar: [Author Only Title Only Author and Title](#)

Ngo, Q.A., Vogler, H., Lituiev, D.S., Nestorova, A., and Grossniklaus, U. (2014). A calcium dialog mediated by the FERONIA signal transduction pathway controls plant sperm delivery. *Dev Cell* 29, 491-500.

Pubmed: [Author and Title](#)

Google Scholar: [Author Only Title Only Author and Title](#)

Nietzel, T., Elsässer, M., Ruberti, C., Steinbeck, J., Ugalde, J.M., Fuchs, P., Wagner, S., Ostermann, L., Moseler, A., Lemke, P., Fricker, M.D., Müller-Schüssele, S.J., Moerschbacher, B.M., Costa, A., Meyer, A.J., and Schwarzländer, M. (2019). The fluorescent protein sensor roGFP2-Orp1 monitors in vivo H<sub>2</sub>O<sub>2</sub> and thiol redox integration and elucidates intracellular H<sub>2</sub>O<sub>2</sub> dynamics during elicitor-induced oxidative burst in Arabidopsis. *New Phytol* 221, 1649-1664.

Pubmed: [Author and Title](#)

Google Scholar: [Author Only Title Only Author and Title](#)

Ogasawara, Y., Kaya, H., Hiraoka, G., Yumoto, F., Kimura, S., Kadota, Y., Hishinuma, H., Senzaki, E., Yamagoe, S., Nagata, K., Nara, M., Suzuki, K., Tanokura, M., and Kuchitsu, K. (2008). Synergistic activation of the Arabidopsis NADPH oxidase AtrbohD by Ca<sup>2+</sup> and phosphorylation. *J Biol Chem* 283, 8885-8892.

Pubmed: [Author and Title](#)

Google Scholar: [Author Only Title Only Author and Title](#)

Okumoto, S., Jones, A., and Frommer, W.B. (2012). Quantitative imaging with fluorescent biosensors. *Annu Rev Plant Biol* 63, 663-706.

Pubmed: [Author and Title](#)

Google Scholar: [Author Only Title Only Author and Title](#)

Peaucelle, A., Braybrook, S., and Höfte, H. (2012). Cell wall mechanics and growth control in plants: the role of pectins revisited. *Front Plant Sci* 3, 121.

Pubmed: [Author and Title](#)

Google Scholar: [Author Only Title Only Author and Title](#)

Pei, Z.M., Murata, Y., Benning, G., Thomine, S., Klüsener, B., Allen, G.J., Grill, E., and Schroeder, J.I. (2000). Calcium channels activated by hydrogen peroxide mediate abscisic acid signalling in guard cells. *Nature* 406, 731-734.

Pubmed: [Author and Title](#)

Google Scholar: [Author Only Title Only Author and Title](#)

Pittman, J.K., and Hirschi, K.D. (2016). CAX-ing a wide net: Cation/H(+) transporters in metal remediation and abiotic stress signalling. *Plant Biol (Stuttg)* 18, 741-749.

Pubmed: [Author and Title](#)

Google Scholar: [Author Only Title Only Author and Title](#)

Schindelin, J., Arganda-Carreras, I., Frise, E., Kaynig, V., Longair, M., Pietzsch, T., Preibisch, S., Rueden, C., Saalfeld, S., Schmid, B., Tinevez, J.Y., White, D.J., Hartenstein, V., Eliceiri, K., Tomancak, P., and Cardona, A. (2012). Fiji: an open-source platform for biological-

**image analysis. Nat Methods 9, 676-682.**

Pubmed: [Author and Title](#)

Google Scholar: [Author Only Title Only Author and Title](#)

**Schmidt, C., Schelle, I., Liao, Y.J., and Schroeder, J.I. (1995). Strong regulation of slow anion channels and abscisic acid signaling in guard cells by phosphorylation and dephosphorylation events. Proc Natl Acad Sci U S A 92, 9535-9539.**

Pubmed: [Author and Title](#)

Google Scholar: [Author Only Title Only Author and Title](#)

**Schumacher, K. (2014). pH in the plant endomembrane system - an import and export business. Curr Opin Plant Biol 22, 71-76.**

Pubmed: [Author and Title](#)

Google Scholar: [Author Only Title Only Author and Title](#)

**Schwarzländer, M., Logan, D.C., Johnston, I.G., Jones, N.S., Meyer, A.J., Fricker, M.D., and Sweetlove, L.J. (2012). Pulsing of membrane potential in individual mitochondria: a stress-induced mechanism to regulate respiratory bioenergetics in Arabidopsis. Plant Cell 24, 1188-1201.**

Pubmed: [Author and Title](#)

Google Scholar: [Author Only Title Only Author and Title](#)

**Seybold, H., Trempe, F., Ranf, S., Scheel, D., Romeis, T., and Lee, J. (2014). Ca<sup>2+</sup> signalling in plant immune response: from pattern recognition receptors to Ca<sup>2+</sup> decoding mechanisms. New Phytol 204, 782-790.**

Pubmed: [Author and Title](#)

Google Scholar: [Author Only Title Only Author and Title](#)

**Shan, X., Yan, J., and Xie, D. (2012). Comparison of phytohormone signaling mechanisms. Curr Opin Plant Biol 15, 84-91.**

Pubmed: [Author and Title](#)

Google Scholar: [Author Only Title Only Author and Title](#)

**Shavruk, Y., and Hirai, Y. (2016). Good and bad protons: genetic aspects of acidity stress responses in plants. J Exp Bot 67, 15-30.**

Pubmed: [Author and Title](#)

Google Scholar: [Author Only Title Only Author and Title](#)

**Shen, Y., Rosendale, M., Campbell, R.E., and Perrais, D. (2014). pHuji, a pH-sensitive red fluorescent protein for imaging of exo- and endocytosis. J Cell Biol 207, 419-432.**

Pubmed: [Author and Title](#)

Google Scholar: [Author Only Title Only Author and Title](#)

**Shih, H.W., Miller, N.D., Dai, C., Spalding, E.P., and Monshausen, G.B. (2014). The receptor-like kinase FERONIA is required for mechanical signal transduction in Arabidopsis seedlings. Curr Biol 24, 1887-1892.**

Pubmed: [Author and Title](#)

Google Scholar: [Author Only Title Only Author and Title](#)

**Shih, H.W., DePew, C.L., Miller, N.D., and Monshausen, G.B. (2015). The Cyclic Nucleotide-Gated Channel CNGC14 Regulates Root Gravitropism in Arabidopsis thaliana. Curr Biol 25, 3119-3125.**

Pubmed: [Author and Title](#)

Google Scholar: [Author Only Title Only Author and Title](#)

**Smirnoff, N., and Arnaud, D. (2019). Hydrogen peroxide metabolism and functions in plants. New Phytol 221, 1197-1214.**

Pubmed: [Author and Title](#)

Google Scholar: [Author Only Title Only Author and Title](#)

**Song, C.J., Steinebrunner, I., Wang, X., Stout, S.C., and Roux, S.J. (2006). Extracellular ATP induces the accumulation of superoxide via NADPH oxidases in Arabidopsis. Plant Physiol 140, 1222-1232.**

Pubmed: [Author and Title](#)

Google Scholar: [Author Only Title Only Author and Title](#)

**Stegmann, M., Monaghan, J., Smakowska-Luzan, E., Rovenich, H., Lehner, A., Holton, N., Belkhadir, Y., and Zipfel, C. (2017). The receptor kinase FER is a RALF-regulated scaffold controlling plant immune signaling. Science 355, 287-289.**

Pubmed: [Author and Title](#)

Google Scholar: [Author Only Title Only Author and Title](#)

**Steinhorst, L., and Kudla, J. (2014). Signaling in cells and organisms - calcium holds the line. Curr Opin Plant Biol 22, 14-21.**

Pubmed: [Author and Title](#)

Google Scholar: [Author Only Title Only Author and Title](#)

**Sze, H., and Chanroj, S. (2018). Plant Endomembrane Dynamics: Studies of K<sup>+</sup>/H<sup>+</sup> Antiporters Provide Insights on the Effects of pH and Ion Homeostasis. Plant Physiol 177, 875-895.**

Pubmed: [Author and Title](#)

Google Scholar: [Author Only Title Only Author and Title](#)

**Takemoto, K., Ebine, K., Askani, J.C., Krüger, F., Gonzalez, Z.A., Ito, E., Goh, T., Schumacher, K., Nakano, A., and Ueda, T. (2018). Distinct sets of tethering complexes, SNARE complexes, and Rab GTPases mediate membrane fusion at the vacuole in Arabidopsis. Proc Natl Acad Sci U S A 115, E2457-E2466.**

Pubmed: [Author and Title](#)

Google Scholar: [Author Only Title Only Author and Title](#)

**Tanaka, K., Swanson, S.J., Gilroy, S., and Stacey, G. (2010). Extracellular nucleotides elicit cytosolic free calcium oscillations in Arabidopsis. Plant Physiol 154, 705-719.**

Pubmed: [Author and Title](#)

Google Scholar: [Author Only Title Only Author and Title](#)

**Tian, L., Hires, S.A., Mao, T., Huber, D., Chiappe, M.E., Chalasani, S.H., Petreanu, L., Akerboom, J., McKinney, S.A., Schreiter, E.R., Bargmann, C.I., Jayaraman, V., Svoboda, K., and Looger, L.L. (2009). Imaging neural activity in worms, flies and mice with improved GCaMP calcium indicators. Nat Methods 6, 875-881.**

Pubmed: [Author and Title](#)

Google Scholar: [Author Only Title Only Author and Title](#)

**Tian, W., Hou, C., Ren, Z., Wang, C., Zhao, F., Dahlbeck, D., Hu, S., Zhang, L., Niu, Q., Li, L., Staskawicz, B.J., and Luan, S. (2019). A calmodulin-gated calcium channel links pathogen patterns to plant immunity. Nature 572, 131-135.**

Pubmed: [Author and Title](#)

Google Scholar: [Author Only Title Only Author and Title](#)

**Vanstraelen, M., and Benková, E. (2012). Hormonal interactions in the regulation of plant development. Annu Rev Cell Dev Biol 28, 463-487.**

Pubmed: [Author and Title](#)

Google Scholar: [Author Only Title Only Author and Title](#)

**Waadt, R., Hitomi, K., Nishimura, N., Hitomi, C., Adams, S.R., Getzoff, E.D., and Schroeder, J.I. (2014). FRET-based reporters for the direct visualization of abscisic acid concentration changes and distribution in Arabidopsis. Elife 3, e01739.**

Pubmed: [Author and Title](#)

Google Scholar: [Author Only Title Only Author and Title](#)

**Waadt, R., Hsu, P.K., and Schroeder, J.I. (2015). Abscisic acid and other plant hormones: Methods to visualize distribution and signaling. Bioessays 37, 1338-1349.**

Pubmed: [Author and Title](#)

Google Scholar: [Author Only Title Only Author and Title](#)

**Waadt, R., Krebs, M., Kudla, J., and Schumacher, K. (2017). Multiparameter imaging of calcium and abscisic acid and high-resolution quantitative calcium measurements using R-GECO1-mTurquoise in Arabidopsis. New Phytol 216, 303-320.**

Pubmed: [Author and Title](#)

Google Scholar: [Author Only Title Only Author and Title](#)

**Wagner, S., Steinbeck, J., Fuchs, P., Lichtenauer, S., Elsässer, M., Schippers, J.H.M., Nietzel, T., Ruberti, C., Van Aken, O., Meyer, A.J., Van Dongen, J.T., Schmidt, R.R., and Schwarzländer, M. (2019). Multiparametric real-time sensing of cytosolic physiology links hypoxia responses to mitochondrial electron transport. New Phytol 224, 1668-1684.**

Pubmed: [Author and Title](#)

Google Scholar: [Author Only Title Only Author and Title](#)

**Walia, A., Waadt, R., and Jones, A.M. (2018). Genetically Encoded Biosensors in Plants: Pathways to Discovery. Annu Rev Plant Biol 69, 497-524.**

Pubmed: [Author and Title](#)

Google Scholar: [Author Only Title Only Author and Title](#)

**Waszczak, C., Carmody, M., and Kangasjärvi, J. (2018). Reactive Oxygen Species in Plant Signaling. Annu Rev Plant Biol 69, 209-236.**

Pubmed: [Author and Title](#)

Google Scholar: [Author Only Title Only Author and Title](#)

**Yoshida, T., Christmann, A., Yamaguchi-Shinozaki, K., Grill, E., and Fernie, A.R. (2019). Revisiting the Basal Role of ABA - Roles Outside of Stress. Trends Plant Sci 24, 625-635.**

Pubmed: [Author and Title](#)

Google Scholar: [Author Only Title Only Author and Title](#)

**Zhang, X., Köster, P., Schlücking, K., Balcerowicz, D., Hashimoto, K., Kuchitsu, K., Vissenberg, K., and Kudla, J. (2018). CBL1-CIPK26-mediated phosphorylation enhances activity of the NADPH oxidase RBOHC, but is dispensable for root hair growth. FEBS Lett 592, 2582-2593.**

Pubmed: [Author and Title](#)

Google Scholar: [Author Only Title Only Author and Title](#)

**Zhao, Y., Araki, S., Wu, J., Teramoto, T., Chang, Y.F., Nakano, M., Abdelfattah, A.S., Fujiwara, M., Ishihara, T., Nagai, T., and Campbell, R.E. (2011). An expanded palette of genetically encoded Ca<sup>2+</sup> indicators. Science 333, 1888-1891.**

Pubmed: [Author and Title](#)

Google Scholar: [Author Only Title Only Author and Title](#)

**Zheng, X., Kang, S., Jing, Y., Ren, Z., Li, L., Zhou, J.M., Berkowitz, G., Shi, J., Fu, A., Lan, W., Zhao, F., and Luan, S. (2018). Danger-Associated Peptides Close Stomata by OST1-Independent Activation of Anion Channels in Guard Cells. Plant Cell 30, 1132-1146.**

Pubmed: [Author and Title](#)

Google Scholar: [Author Only Title Only Author and Title](#)
